# Supplementary material for: Investigating the roles of hyperglycaemia, hyperinsulinaemia and elevated free fatty acids in cardiac function in patients with type 2 diabetes via treatment with insulin compared with empagliflozin: protocol for the HyperCarD2 randomised, crossover trial
Source: PubMed Central journal article supplement — BMJ Open. 2022 Aug 11;12(8):e054100. doi: 10.1136/bmjopen-2021-054100 (PMC9379482; doi:10.1136/bmjopen-2021-054100), 2022-08-11
Supplement: bmjopen-2021-054100.draft_revisions.pdf [file bmjopen-2021-054100.draft_revisions.pdf]

# BMJ Open

BMJ Open is committed to open peer review. As part of this commitment we make the peer review history of every article we publish publicly available.

When an article is published we post the peer reviewers' comments and the authors' responses online. We also post the versions of the paper that were used during peer review. These are the versions that the peer review comments apply to.

The versions of the paper that follow are the versions that were submitted during the peer review process. They are not the versions of record or the final published versions. They should not be cited or distributed as the published version of this manuscript.

BMJ Open is an open access journal and the full, final, typeset and author-corrected version of record of the manuscript is available on our site with no access controls, subscription charges or pay-per-view fees (<http://bmjopen.bmj.com>).

If you have any questions on BMJ Open's open peer review process please email [info.bmjopen@bmj.com](mailto:info.bmjopen@bmj.com)

# BMJ Open

## THE ROLE OF HYPERGLYCEMIA, HYPERINSULINEMIA AND ELEVATED FREE FATTY ACIDS FOR CARDIAC FUNCTION IN PATIENTS WITH TYPE 2 DIABETES - THE HYPERCARD2 STUDY

|                               |                                                                                                                                                                                                                                                                                                                                                                                                                                                                                                                                                                                                                                                                                                                                                                                                                                                                                                                                                                                                                                                                                                           |
|-------------------------------|-----------------------------------------------------------------------------------------------------------------------------------------------------------------------------------------------------------------------------------------------------------------------------------------------------------------------------------------------------------------------------------------------------------------------------------------------------------------------------------------------------------------------------------------------------------------------------------------------------------------------------------------------------------------------------------------------------------------------------------------------------------------------------------------------------------------------------------------------------------------------------------------------------------------------------------------------------------------------------------------------------------------------------------------------------------------------------------------------------------|
| Journal:                      | <i>BMJ Open</i>                                                                                                                                                                                                                                                                                                                                                                                                                                                                                                                                                                                                                                                                                                                                                                                                                                                                                                                                                                                                                                                                                           |
| Manuscript ID                 | bmjopen-2021-054100                                                                                                                                                                                                                                                                                                                                                                                                                                                                                                                                                                                                                                                                                                                                                                                                                                                                                                                                                                                                                                                                                       |
| Article Type:                 | Protocol                                                                                                                                                                                                                                                                                                                                                                                                                                                                                                                                                                                                                                                                                                                                                                                                                                                                                                                                                                                                                                                                                                  |
| Date Submitted by the Author: | 04-Jun-2021                                                                                                                                                                                                                                                                                                                                                                                                                                                                                                                                                                                                                                                                                                                                                                                                                                                                                                                                                                                                                                                                                               |
| Complete List of Authors:     | Thirumathyam, Roopameera; Hvidovre Hospital, Department of Endocrinology<br>Richter, Erik; University of Copenhagen, Department of Nutrition, Exercise and Sports, Section of Molecular Physiology, Faculty of Science<br>Goetze, Jens; University of Copenhagen, Department of Clinical Biochemistry, Rigshospitalet<br>Fenger, Mogens; Hvidovre Hospital, Department of Clinical Biochemistry<br>Van Hall, Gerrit; Rigshospitalet, Clinical Metabolomics Core Facility, Clinical Biochemistr; University of Copenhagen, Department of Biomedical Sciences, Faculty of Health Sciences<br>Dixen, Ulrik; Hvidovre Hospital, Department of Cardiology<br>Holst, Jens; University of Copenhagen, NovoNordisk Center for Basic Metabolic Research; University of Copenhagen, Department of Biomedical Sciences, Faculty of Health Sciences<br>Madsbad, Sten; Hvidovre Hospital, Department of Endocrinology<br>Vejlstrup, Niels; Rigshospitalet, Department of Cardiology<br>Madsen, Per; Herlev Hospital, Department of Cardiology<br>Jørgensen, Nils Bruun; Hvidovre Hospital, Department of Endocrinology |
| Keywords:                     | Coronary heart disease < CARDIOLOGY, Ischaemic heart disease < CARDIOLOGY, Myocardial infarction < CARDIOLOGY, Diabetic nephropathy & vascular disease < DIABETES & ENDOCRINOLOGY, DIABETES & ENDOCRINOLOGY                                                                                                                                                                                                                                                                                                                                                                                                                                                                                                                                                                                                                                                                                                                                                                                                                                                                                               |
|                               |                                                                                                                                                                                                                                                                                                                                                                                                                                                                                                                                                                                                                                                                                                                                                                                                                                                                                                                                                                                                                                                                                                           |

SCHOLARONE™  
Manuscripts

**TITLE**

PROTOCOL: THE ROLE OF HYPERGLYCEMIA, HYPERINSULINEMIA AND ELEVATED FREE FATTY ACIDS FOR CARDIAC FUNCTION IN PATIENTS WITH TYPE 2 DIABETES - THE HYPERCARD2 STUDY

Short title: The HyperCarD2 study

**AUTHORS:**

Roopameera Thirumathyam<sup>1</sup>, Erik A. Richter<sup>2</sup>, Jens P. Goetze<sup>3</sup>, Mogens Fenger<sup>4</sup>, Gerrit van Hall<sup>5,8</sup>, Ulrik Dixen<sup>6</sup>, Jens Juul Holst<sup>7,8</sup>, Sten Madsbad<sup>1</sup>, Niels Vejstrup<sup>9</sup>, Per Lav Madsen<sup>10</sup>, Nils Bruun Jørgensen<sup>1</sup>

**AUTHOR AFILIATIONS:**

1. Department of Endocrinology, Hvidovre Hospital, Hvidovre, Denmark
2. Department of Nutrition, Exercise and Sports, Section of Molecular Physiology, Faculty of Science, Copenhagen, Denmark.
3. Department of Clinical Biochemistry, Rigshospitalet, University of Copenhagen, Denmark.
4. Department of Clinical Biochemistry, Hvidovre Hospital, Denmark
5. Clinical Metabolomics Core Facility, Clinical Biochemistry, Rigshospitalet, Denmark
6. Department of Cardiology. Hvidovre Hospital, Denmark
7. Novo Nordisk Center for Basic Metabolic Research
8. Department of Biomedical Sciences, Faculty of Health Sciences, University of Copenhagen, Denmark
9. Department of Cardiology, Rigshospitalet, Copenhagen, Denmark
10. Department of Cardiology, Herlev Hospital, Herlev, Denmark

CORRESPONDING AUTHOR: Nils Bruun Jørgensen – email: [nilsbuun.joergensen@regionh.dk](mailto:nilsbuun.joergensen@regionh.dk)

WORD COUNT: Max 4000 words

## ABSTRACT

**Introduction:** Type 2 diabetes (T2D) is characterised by elevated plasma glucose, free fatty acid (FFA) and insulin concentrations, and this metabolic profile is linked to diabetic cardiomyopathy, a diastolic dysfunction at first, and increased cardiovascular disease (CVD) risk. Shifting cardiac metabolism towards glucose utilisation has been suggested to improve cardiovascular function and CVD risk, but insulin treatment increases overall glucose oxidation and lowers lipid oxidation, without reducing CVD risk, whereas SGLT-2 inhibitors (SGLT-2i) increase FFA, ketone body concentrations and lipid oxidation while decreasing insulin concentrations and CVD risk. The aim of the present study is to elucidate the importance of different metabolic profiles obtained during treatment with an SGLT2i versus insulin for myocardial function in patients with T2D.

**Methods and analyses:** Randomised, cross-over study, where 20 patients with T2D and BMI >28 kg/m<sup>2</sup> receive 25 mg empagliflozin qd or NPH insulin bid first for 5 weeks followed by a 3-week washout before crossing over to the remaining treatment. Insulin treatment is titrated to achieve similar glycaemic control as with empagliflozin. In those randomised to insulin first, glycaemia during an initial empagliflozin run-in period prior to randomisation serves as target glucose. Metabolic and cardiac evaluation is performed before and at the end of each treatment period.

The primary endpoint is change (treatment – washout) in left ventricular peak filling rate, as assessed by cardiac MR (CMR) with and without acute lowering of plasma FFAs with acipimox. Secondary and explorative endpoints are changes in left atrial passive emptying fraction, left ventricular ejection fraction, central blood volume and metabolic parameters.

**Ethics and dissemination:** This study is approved by the Danish Medicines Agency, the Danish Data Protection Agency and the Capital Region Ethics Committee. The trial is conducted in accordance with ICH-GCP guidelines and the Helsinki Declaration. Trial registration number: EudraCT: 2017-002101

## STRENGTHS AND LIMITATIONS

- Comparison with NPH Insulin, which has opposite metabolic effects to empagliflozin, provides a strong basis for detecting metabolic effects on cardiac function.
- Repeated CMR, during depletion of plasma FFAs with acipimox during treatments and washouts allows for dissection of the individual roles of hyperglycaemia, hyperinsulinemia and elevated free fatty acids on cardiac function in T2D.
- Cross-over over design is more difficult to perform, but provides greater statistical power
- Effects of metabolic changes on cardiac function are limited to the 5-week intervention period, which excludes effects arising from longer-term treatment.

## INTRODUCTION

Type 2 diabetes (T2D) is characterised by hyperglycaemia, hyperinsulinemia, increased free fatty acids and impaired tissue glucose uptake and oxidation [1]. T2D is associated with an increased cardiovascular morbidity, and the more dysregulated the metabolic state, the greater the cardiovascular risk [2–5]. T2D develops when insulin secretion can no longer compensate for the ambient insulin resistance, and therefore previous treatments has focused on increasing insulin signalling by either exogenous insulin administration, stimulation of endogenous insulin secretion or enhancing insulin sensitivity [1].

Diabetic cardiomyopathy (DCM), is an early “silent” complication to T2D, independent of hypertension and/or coronary heart disease. It is characterised by left ventricular (LV) hypertrophy and diastolic dysfunction [6] and has been linked to the increased cardiovascular risk in T2D [7]. DCM may be accurately described by measuring left ventricular peak filling rate (LVPFR) and left ventricular ejection fraction (LVEF) using cardiac magnetic resonance imaging (CMR) [8,9]. Both diastole and systole are energy requiring processes and sensitive to changes in energy availability [10,11]. Interestingly, cardiac metabolism in patients with T2D is altered and depends more on lipid oxidation and less on glucose oxidation compared to non-diabetic controls [12,13]. It has been argued that glucose oxidation is a better source of energy for the heart than lipid oxidation, especially during stress such as myocardial ischemia, because this yields more ATP pr. unit oxygen [14]. However, manipulating cardiac metabolism towards glucose oxidation, by administering glucose-insulin (-potassium) infusions in patients with hyperglycaemia and myocardial infarction has been attempted, but did not improve survival in neither diabetic nor non-diabetic patients [15–17]. In intensive care unit patients, strict glycaemic control using insulin has been associated with increased mortality [18], and in patients with T2D and increased CVD risk, intensive glycaemic control has not reduced CVD risk compared to conventional glycaemic control [19–22] and in the ACCORD study, which involved aggressive insulin treatment resulted in excess mortality [23]. Thus, insulin treatment does not prevent cardiovascular events in patients with T2D nor improve prognosis when such occur [24].

SGLT2-inhibition (SGLT2i), on the other hand, is a newer treatment principle in T2D, which has proven effective in attenuating the risk of myocardial infarctions, worsening of heart failure, cardiovascular mortality and all-cause mortality in patients with T2D [25–27]

SGLT2i increases renal glucose excretion thereby lowering plasma glucose and insulin levels and increasing glucagon release, lipolysis and ketogenesis [28,29]. Additionally, tissue glucose uptake and oxidation is reduced and hepatic glucose production increased [30]. The exact cardioprotective mechanisms of SGLT2i are not yet understood, but has been proposed to be linked to improved haemodynamics [31], inhibition of myocardial  $\text{Na}^+/\text{H}^+$  exchange [32,33] or reductions in inflammatory activity [34,35].

An early and interesting hypothesis proposed that changes in cardiac metabolism may be responsible for the cardioprotective effect of SGLT2i. The lowered glucose and insulin

1  
2  
3  
4 concentrations, persistent hyperketonaemia and elevated free fatty acids, caused by SGLT2i  
5 treatment, leads to reduced glucose uptake, increased ketone body uptake and oxidation and  
6 unchanged uptake of free fatty acids in the heart while overall lipid oxidation is increased [36,37].  
7 This altered energy metabolism may improve myocardial function, especially during myocardial  
8 stress [38–40]. The SGLT2i induced myocardial fuel switch from glucose to fatty acids and ketone  
9 bodies, has been suggested to ameliorate adverse cardiac remodelling and heart failure in  
10 nondiabetic porcine models [41], and it is noteworthy that eliminating the availability of free fatty  
11 acids to insulin resistant hearts can lead to cardiac dysfunction in rodents and in humans, suggesting  
12 an important role for lipid metabolism in cardiac function [42–45]. Cardiovascular endpoint trials  
13 with SGLT2 inhibitors have shown effects within weeks after initiation of treatment, coinciding  
14 with the metabolic effects of the treatment [25,37]

15  
16  
17  
18  
19  
20 Altogether, SGLT2 inhibitors “amplify” some components of the dysmetabolic profile of T2D and  
21 works opposite the metabolic effects of insulin. This raises the question of how cardiac function in  
22 patients with T2D depends on lipid and glucose oxidation in the resting state and during stress, and  
23 how increasing or lowering blood glucose, free fatty acids, ketone bodies and insulin concentrations  
24 influence cardiac function.

### 25 26 27 28 Objective

29 The primary objective of the present study is to evaluate myocardial function in patients with T2D  
30 and high risk of CV events using advanced cardiac magnetic resonance imaging (CMR) scans  
31 during rest, chronotropic stress and under depletion of plasma free fatty acids before and after 5  
32 weeks of empagliflozin treatment (high free fatty acid and ketone body concentrations, high lipid  
33 oxidation and low insulin concentrations) and before and after 5 weeks of human insulin treatment  
34 titrated to yield glycaemic control similar to the empagliflozin treatment period (low free fatty acid  
35 and ketone body concentrations, high insulin concentrations and glucose oxidation).

### 36 37 38 39 40 Hypothesis

41 We hypothesise that hyperinsulinemia and hyperglycaemia are conditions that negatively affect  
42 cardiac function in T2D, while the availability of free fatty acids and ketone bodies and switching  
43 metabolism towards lipid oxidation improves cardiac diastolic and systolic function. Thus, we  
44 expect that lowering plasma glucose insulin-independently, and increasing fatty acid  
45 concentrations, lipid oxidation and ketone body availability with empagliflozin treatment, improves  
46 myocardial function in patients with T2D, and that depleting plasma of free fatty acids during  
47 empagliflozin treatment will impair cardiac function.

## 48 49 50 51 52 53 METHODS AND ANALYSES

### 54 Design

55 This is a 20-week prospective, investigator-initiated, comparator controlled, open label, 2-arm  
56 cross-over, human study where subjects are randomised in blocks of 3-5 to NPH insulin or  
57 Empagliflozin treatment (25 mg once daily) for 5±1 weeks, followed by 3±1 weeks wash-out and  
58  
59  
60

1  
2  
3  
4 cross-over of treatment for  $5\pm 1$  weeks (figure 1). For 7 weeks preceding randomisation, but after  
5 inclusion, patients undergo a program of 2 weeks of washout of pre-existing antiglycaemic  
6 treatment (except metformin), 2 weeks of empagliflozin run-in (used for glycaemic target and  
7 titration of treatment in participants randomised to insulin first, see below) followed by 3 weeks of  
8 wash-out. During run-in and treatment periods, participants measure blood glucose twice daily  
9 (fasting and before evening meal), and during washouts patients measure fasting blood glucose.  
10 After the screening visit (V0) there are four study visits (V1-4) – before and at the end of each  
11 treatment period. Each visit consists of three study days – a metabolic study day (MET) and two  
12 CMR study days. Randomisation is performed at V1 after the metabolic study day.  
13  
14  
15

### 16 Participants

17  
18 Twenty subjects older than 18 years diagnosed with T2D, a BMI  $\geq 28$  kg/m<sup>2</sup>, HbA1c  $\leq 9\%$ , fasting  
19 C-peptide  $>500$  pmol/L and unchanged antiglycaemic treatment for 12 weeks prior to screening,  
20 and who are at a risk of cardiovascular disease (CVD), are eligible for the study. High CVD risk is  
21 modified from the EMPA-REG protocol [46]. Inclusion, exclusion and withdrawal criteria are listed  
22 in Box 1.  
23  
24

### 25 Recruitment

26  
27 Participants are recruited from the Department of Endocrinology and Cardiology at Hvidovre  
28 Hospital and are identified by reviewing laboratory results and patient files. Potential participants  
29 will be contacted by means of a recruitment letter, in which they are informed of the opportunity to  
30 participate in a scientific research project. We also will advertise for participant in local newspapers  
31 and on the internet as well as social media (e.g. [www.forsogsperson.dk](http://www.forsogsperson.dk); [www.sundhed.dk](http://www.sundhed.dk) and  
32 [www.facebook.com](http://www.facebook.com)).  
33  
34  
35

### 36 Outcomes

37  
38 The primary outcome is change in myocardial diastolic function. This was chosen because firstly,  
39 diastole is a highly energy requiring process [10,11], and secondly, because diastolic dysfunction  
40 (with or without LV hypertrophy) is the notable early manifestation of diabetic cardiomyopathy [6].  
41 Thus, if changes in overall energy metabolism are to affect cardiac function in patients with T2D, it  
42 may well occur in diastole at the earliest. Diastolic cardiac function can be accurately assessed  
43 using CMR by measuring left ventricular peak filling rate (LVPFR) and left atrial passive emptying  
44 fraction (LAPEF) [47]. Our primary outcome measure is change ( $LVPFR_{\text{treatment}} - LVPFR_{\text{wash-out}}$ ) in  
45 LVPFR ( $\Delta LVPFR$ ). All endpoints are listed in Box 2.  
46  
47  
48  
49

### 50 Randomisation and intervention

51  
52 Participants are randomised consecutively by lottery in blocks of 3-5 to treatment with either  
53 subcutaneous NPH insulin (Insulatard®) twice daily or oral empagliflozin (Jardiance®) 25 mg once  
54 daily first. All patient will receive both treatments during the trial. Randomisation is performed at  
55 V1. NPH insulin is initiated at a dose of 0.2 IU/kg body weight/day and is titrated daily over phone  
56 (phone contacts, figure 1) by 0.05 IU/kg body weight/day until average blood glucose over three  
57 consecutive days is within  $\pm 1$  mmol/L of the individual glycaemic target. In participants  
58  
59  
60



1  
2  
3  
4 randomised to insulin first, the glycaemic target is average fasting and evening glucose  
5 concentrations during the second week of empagliflozin run-in. In patients randomised to insulin  
6 second, the glycaemic target is average fasting and pre-prandial evening BG values of week 3 and 4  
7 during the first (empagliflozin) treatment period.

8  
9 As previously discussed, insulin and empagliflozin represents two metabolically opposing methods  
10 for lowering plasma glucose concentrations. By titrating insulin treatment to match the glycaemic  
11 control found with empagliflozin in the same participants, the result is two distinct metabolic  
12 phenotypes: one with hyperinsulinemia and suppressed levels of FFAs (NPH insulin treatment), and  
13 one with reduced insulin levels and increased levels of FFAs (empagliflozin treatment) - but both  
14 with the same levels of glycaemic control (Figure 2). NPH Insulin has been chosen over more  
15 modern human insulin analogues, as it is not albumin bound and can be measured in an ordinary  
16 insulin assay.  
17  
18  
19

### 20 Safety considerations

21 During washout periods blood glucose concentrations will increase – that is a separate point of the  
22 study, but severely dysregulated diabetes is an exclusion criterium to ensure participant safety. The  
23 risk of severe hyperglycaemia is reduced in several ways in the study:  
24

- 25 • Existing metformin treatment is continued throughout the whole study as background  
26 antiglycaemic treatment.
- 27 • In case of fasting BG concentrations of more than 13 mmol/L, patients are instructed to  
28 contact study personnel.
- 29 • Phone contacts by study investigator are planned in the second week of washout periods to  
30 follow up on the patient and enquire to hyperglycaemic events or other adverse events.
- 31 • As soon as the final day (CMR with acipimox) of a washout visit (visit 1 or 3) is completed,  
32 antiglycaemic treatment according to study drug sequence is commenced to minimise time  
33 spent in hyperglycaemia.  
34  
35  
36  
37

38 In case of fasting BG > 13 mmol/L, the patient will be contacted daily for two additional days. If  
39 average fasting BG over the 3 days > 13 mmol/L that triggers an extra safety visit, where fasting  
40 plasma glucose (PG) is measured. If PG > 13 mmol/L on the day of the extra visit, then the patient  
41 is withdrawn from the study and antihyperglycaemic treatment is initiated.  
42  
43

### 44 Screening visit (V0)

45 Once oral and written informed consent is obtained by the study investigator, the screening  
46 procedure follows. Medical history is recorded, screening blood samples drawn, and an ECG,  
47 recording of blood pressure, pulse rate and registration of anthropometric data are performed, and  
48 patients are screened according to in- and exclusion criteria. A standard transthoracic  
49 echocardiography is performed, and VO<sub>2</sub>max is estimated (Box 3).  
50  
51  
52  
53  
54  
55

### 56 Study visits

57 All study visits consist of three study days – a metabolic study day and two CMR study days (Box  
58 4).  
59  
60



### The metabolic study day

The metabolic study is conducted at the Department of Endocrinology, Hvidovre Hospital, to document the metabolic effects of each study drug.

Participants meet in the morning after an overnight fast. Anthropometric data, blood pressure, pulse rate and an ECG are recorded, and two catheters, one in each arm are inserted for infusion of tracers and for repeated drawing of arterialised blood samples respectively. Baseline and safety blood samples are taken (Box 5), the participant empties bladder and the investigational drug (V2, V4) and the participants usual medications are administered at 0800h. Body composition is determined by Dual energy x-ray absorptiometry scan (DXA).

### Basal metabolism

Primed infusions of stable glucose ([6,6-D<sub>2</sub>]-glucose) and glycerol ([1,1,2,3,3-D<sub>5</sub>]-glycerol) tracers are initiated (T=-180 min). Blood is sampled at -30, -15 and -2 min to characterise glucose, lipid and amino acid metabolism. The patient empties bladder, urine is weighed, and samples are taken for determination of tracer concentrations and urinary nitrogen excretion, and the 5h-OGTT is initiated.

### 5h-OGTT

The patient ingests anhydrous glucose (72 g) with added [U-13C6]-glucose tracer (3 g) dissolved in 250 mL of water over 5 minutes (T=0 min). Intravenous tracer infusions continue unchanged. Blood is sampled regularly for 5 hours for characterisation of postprandial glucose, lipid and amino acid metabolism (Box 4 and 5). The patient empties bladder regularly during and at the end of the OGTT. Urine is sampled for nitrogen excretion and tracers/tracees.

Fat and muscle biopsies: Biopsies are obtained during the basal (T=-60 min) and the maximally insulin stimulated (T=60 min) state. Muscle biopsies are considered proxies for cardiomyocyte metabolic status. 30 min ventilated hood indirect calorimetry (Vyair Vyntus® CPX) is performed during the basal period (prior to biopsies) t= -90 min and postprandially at t=60 min for determination of fasting and postprandial energy expenditure and respiratory quotient.

### Exercise test (50% VO<sub>2</sub>max)

At T=300 min, the participant is exercised at 60 W for 4 minutes after which work load is increased until oxygen consumption is 50% of estimated VO<sub>2</sub>max. Pulse rate is recorded with a chest mounted pulse rate monitor and oxygen consumption with a mask mounted indirect calorimeter. Blood is sampled to characterise glucose, lipid and amino acid metabolism (Box 4 and 5). After 30 min, VO<sub>2</sub>max is estimated by increasing workload by 50W until a pulse rate increase of 30. When pulse is steady for 2 min, oxygen consumption and pulse rate are recorded, and the test is stopped. VO<sub>2</sub>max is estimated by linear extrapolation to the theoretical maximum pulse rate (220-age).

### Ad libitum meal test

SGLT2 inhibition is associated with a lower weight reduction than predicted from the urinary energy loss. SGLT2 inhibition does not change resting energy expenditure or blunt the thermogenic

1  
2  
3  
4 effect of feeding, suggesting that energy intake is increased [37]. Therefore, the metabolic study day  
5 is ended with an *ad libitum meal*, consisting of thoroughly mixed pasta bolognese (fixed nutrient  
6 composition and energy content). Patients are placed in a quiet corner and instructed to eat until  
7 full. Two glasses of water (total 300 mL) are allowed with the meal. The meal is weighed before  
8 and after serving and *ad libitum meal* intake defined as the difference. Throughout the day patients  
9 are asked to score their hunger, satiety and sensation of fullness on a visual analogue scale [48].  
10  
11  
12

### 13 Cardiac evaluation

14 Two CMR days are performed during each visit (V1-V4). In addition, diurnal blood pressure and  
15 Holter monitoring are performed. CMR is conducted at the Department of Cardiology,  
16 Rigshospitalet, Copenhagen, whereas Holter monitoring and diurnal blood pressure monitoring are  
17 performed at the Department of Cardiology, Hvidovre Hospital.  
18  
19

20 Participants meet fasting and morning medication, including investigational medicinal product (V2  
21 and V4), is administered. Anthropometric data are recorded, and two intravenous catheters are  
22 inserted into an antecubital and the contralateral dorsal hand vein for infusion of adenosine,  
23 gadolinium contrast and glycopyrrolate and for blood sampling respectively (Box 5). Prior to CMR  
24 a transthoracic echocardiography is performed (Box 3)  
25  
26  
27

28 CMR is performed on a 1.5 Tesla scanner (Siemens Aera; Siemens; Erlangen; Germany) with the  
29 patient lying supine on the back, using an 18-channel cardiac coil with continuous ECG gating.  
30  
31

32 Cine 2-, 3- and 4-chamber images, complete transverse and short axis cine stacks covering the  
33 whole heart are acquired. All images are obtained during end-expiratory breath-holds.  
34 Myocardial perfusion images during rest and stress are obtained at the basal, mid-ventricular and  
35 apical cardiac short-axis level. Rest perfusion images of the myocardium is acquired using an  
36 intravenous bolus of gadolinium contrast (Gadovist®, Bayer AG, Germany) 0.075 mmol/kg  
37 bodyweight. The time of gadolinium contrast entry into the right and the left ventricle is accurately  
38 determined, and this transit time of gadovist multiplied by cardiac output is used to calculate the  
39 pulmonary and central (pulmonary + cardiac) blood volume.  
40  
41  
42  
43

44 Myocardial stress perfusion images are obtained with an i.v dose of 0.075 mmol/kg of gadovist  
45 during and 10 min after an intravenous adenosine (140 µg/min) administered for maximum 4  
46 minutes). This is followed by evaluation of cardiac function during chronotropic stress, where short  
47 axis cine stack will be reacquired 10 minutes after the administration of intravenous glycopyrrolate  
48 (4 µg/kg, max. 400µg, given as a bolus). This approach has been shown to unmasque subclinical  
49 diastolic dysfunction as has been demonstrated in normal healthy elderly [47].  
50  
51  
52  
53  
54  
55

### 56 Cardiac MRI, Acipimox

57 CMR scans will follow the same procedure as described above, but participants are instructed to  
58 ingest 250 mg acipimox p.o. twice, 4 hours before and right before the scan, to determine  
59  
60

1  
2  
3  
4 myocardial function. This repeated administration of acipimox is required for adequate suppression  
5 of hormone sensitive lipase activity and depletion of plasma FFAs (28). This has been shown to  
6 gradually impair cardiac function [49], and is done to disclose any coupling between FFA  
7 availability and cardiac function.  
8  
9

### 10 CMR image analysis

11 Is performed using Circle42 (Circle Cardiovascular Imaging Inc., Calgary Canada, v5.5.1). LV  
12 volumes, LV mass, LV ejection fraction (LVEF) and LV peak filling rate are determined by tracing  
13 of the endo- and epicardial contours in end-diastolic and end-systolic phases. The papillary muscles  
14 are excluded from the myocardium. On native and post-contrast T1-mappings, endocardial and  
15 epicardial borders are traced, and the mean extra cellular volume (ECV) is calculated from areas  
16 outside late gadolinium enhancement (LGE) lesions. For determination of the ECV within an LGE  
17 lesion, myocardium without LGE in the segment is excluded. Myocardial perfusion scans are  
18 inspected for perfusion defects. Regions with infarctions, sub-endocardial perfusion defects or dark-  
19 rim artefacts will be excluded. Blinded to clinical data, the analyses will be reviewed and finalised  
20 by two CMR specialist.  
21  
22  
23  
24

### 25 Diurnal blood pressure and Holter monitoring

26 Between study days during each visit, diurnal blood pressure is recorded (ScottCare, ABP 320,  
27 Cleveland, OH)) for 24 hours with 15 minutes intervals between 6.00 to 22.00- and 60-min  
28 intervals during night-time. Cardiac rhythm is evaluated with Holter monitoring (SCOTTCARE,  
29 CHROMA, model RZ153C, Cleveland, OH) for 48 hours.  
30  
31  
32

### 33 Patient and public involvement

34 No patient involved.  
35  
36  
37

## 38 ANALYSES

### 39 Blood and tissue samples

40 Subcutaneous fat- and muscle biopsies: Local analgesia is applied before sampling with a  
41 Bergströms cannula. Samples are immediately frozen in liquid nitrogen and stored at -80°C. Blood  
42 and urine samples: Samples are spun, aliquoted and stored at -20°C (GLP-1, PYY, Glucagon) or -  
43 80°C for later analysis. Bedside plasma glucose measurements are performed using the glucose  
44 oxidase technique (YSI model 2300 STAT Plus; YSI, Yellow Springs, OH). Home blood glucose  
45 measurements are carried out on Contour XT (Ascensia Diabetes Care Holdings AG, Basel,  
46 Switzerland). Safety blood- and urine samples are analysed on the same day at the Department of  
47 Clinical Biochemistry, Hvidovre Hospital.  
48  
49  
50  
51  
52

### 53 Statistical methods

#### 54 Sample size calculation

55 Measures of myocardial function are highly reproducible when assessed using CMR, and interstudy  
56 and cohort coefficients of variation are in the range of 3-5% [50–52]  
57 Using the same CMR protocol as the present, Ahtarovski et al found a mean difference of 92 ml/s in  
58 Left Ventricular Peak Filling Rate between healthy young (585±62 ml/s) and healthy elderly  
59  
60

1  
2  
3  
4 subjects (493±55 ml/s) [52]. We assume that T2D patients have LVPFR corresponding to healthy  
5 elderly subjects, and we assume that empagliflozin treatment improves LVPFR by 30 ml/s  
6 ( $\Delta$ LVPFR=30 ml/s) from baseline and that insulin treatment does not improve LVPFR ( $\Delta$ LVPFR=0  
7 ml/s).  
8

9 Conservatively setting the standard deviation of between treatment differences of  $\Delta$ LVPFR at 30  
10 ml/s, a number of 20 patients would be adequate to determine a 30 ml/s difference between the two  
11 treatments with a power of 93% and a two-sided significance level of 0.01, when evaluating data  
12 with the paired student's t-test.  
13

### 14 15 Statistical analysis plan

16 The primary and secondary endpoints are analysed assuming no period effect or treatment-period  
17 interaction. This assumption is reasonable, given results from similar studies, where no such  
18 interactions or effects have been reported [53]. Normally distributed data are presented using  
19 standard descriptive statistics, and reported as mean (SD) for normally distributed and median  
20 (Q1;Q3) for non-normally distributed data. Likewise, comparisons of normally distributed data is  
21 done using the paired Student's t-test for all completers, whereas Wilcoxon's paired signed rank test  
22 will be used if data is non-normally distributed.  
23  
24

### 25 26 Ethics and dissemination

27 The study is conducted according to ICH GCP guidelines E6 (R2) and registered with the Danish  
28 Medicines Agency (EudraCT no. 2017-002101-35, The Capital Region Ethical Committee (H-  
29 17018846) and the Danish Data Protection Agency (2012-58-0004; AHH-2017-093, I-Suite nr.:  
30 06012). Our results, regardless of outcome, will be published in relevant scientific journals. In  
31 addition, we will seek to disseminate results through presentations at scientific meetings.  
32 Publication will take place as soon as scientifically feasible. No later than 12 months after  
33 unregistering of the study, will results be made available at [www.clinicalregister.eu](http://www.clinicalregister.eu).  
34  
35  
36

### 37 38 Timeframe

39 Screenings are performed from January 2018. Last patient, last visit is expected second half of 2021  
40 after which the study will be unregistered with the Danish Medicines Agency and the Capital  
41 Region Municipal Ethical Committee within 90 days. Data analyses are expected to be completed  
42 by Winter 2022.  
43

## 44 45 DISCUSSION

46 The profound and swift benefits of SGLT2i on cardiovascular risk in T2D have inspired the  
47 discussion of metabolism and its importance for cardiac function in patients with T2D [54–58].  
48 Especially since, SGLT2 inhibitors have metabolic effects that by and large are opposite to those of  
49 insulin treatment. Thus, insulin treatment is associated with increased tissue glucose uptake and  
50 utilisation, but suppression of lipid mobilisation and oxidation as well as lowering of plasma  
51 concentrations of ketone bodies [59]. SGLT2 inhibitors increase lipid mobilisation and oxidation,  
52 increase plasma ketone body concentrations and reduce tissue glucose uptake [37,60]. Both  
53 treatments lower plasma glucose, but insulin treatment increases whereas SGLT2i treatment  
54 decreases plasma insulin concentrations. Whether such changes in metabolism affect cardiac  
55 function, is still unsettled, but forcing cardiac glucose uptake and utilisation through insulin  
56 treatment has been suggested by some to benefit and by others to impair cardiac function [45,61–  
57  
58  
59  
60

64], while yet others have suggested increased lipid and ketone body oxidation to be important for proper cardiac function in T2D [44,55,64]. Studies on SGLT2i treatments and the effects on cardiac function are beginning to emerge. In a recent study, 42 patients with T2D were randomised to 12 weeks of empagliflozin 10 mg or placebo once daily. SGLT2 inhibition was shown to rapidly improve diastolic cardiac function as evaluated with echocardiography [65]. In a placebo controlled cross-over design, after 4 weeks of empagliflozin treatment in patients with T2D, myocardial glucose uptake was reduced and fatty acid oxidation unaltered, but this did not significantly change myocardial oxygen consumption or cardiac efficiency, nor any measure of cardiac function [66]. In a Swedish study, 6 weeks dapagliflozin treatment showed unchanged cardiac fatty acid uptake, a trend toward reduced left atrial maximal volume, and reduced LV oxygen consumption and external work compared to placebo [67], and in the only study found, where an active comparator was used, 10 mg empagliflozin once daily for 12 weeks did not change cardiac lipid accumulation (as measured by MR spectrometry), cardiac function or cardiac metabolism compared to sitagliptin 50 mg daily [68].

In conclusion, existing studies in humans have shown divergent results regarding changes in cardiac diastolic function with little changes in cardiac metabolism. However, most studies have compared cardiac effects of SGLT2i to placebo, thus not accounting for the circumstances that characterised the EMPA-REG trial, where anti glycaemic treatment was intensified in the placebo group concurrently [25]. Thus, the CVD risk benefits of the study may have arisen from unfavourable metabolic consequences of the treatment in the placebo arm. In the one study with an active comparator empagliflozin was compared to sitagliptin, which not only affects the incretin system but also has less specific metabolic effect [69]. Therefore, to date our study, is the one to most directly pursue the coupling between metabolism and cardiac function, by choosing insulin as the comparator, and by including the effects of acute lowering of free fatty acid concentrations in plasma on cardiac function.

### Disclosure summary

All authors have completed the ICMJE uniform disclosure form and declare: no support from any organisations for the submitted work; SM and NBJ have received research grants from Boehringer Ingelheim and JJH serves on advisory boards for Novo Nordisk, no other relationships or activities that could appear to have influenced the submitted work.

### Funding

The study is funded by an investigator-initiated study grant from Boehringer Ingelheim. Additional funding comes from Grosserer L. F. Foghts Fond, Charlottenlund, Denmark. Grant numbers not applicable.

### Contributions Author contributions

1  
2  
3  
4  
5  
6  
7  
8  
9  
10  
11  
12  
13  
14  
15  
16  
17  
18  
19  
20  
21  
22  
23  
24  
25  
26  
27  
28  
29  
30  
31  
32  
33  
34  
35  
36  
37  
38  
39  
40  
41  
42  
43  
44  
45  
46  
47  
48  
49  
50  
51  
52  
53  
54  
55  
56  
57  
58  
59  
60

| Box 1: Eligibility criteria                                                                                                                                                                                                                                                                                                                                                                                                                                                                                                                                                                                                                                                                                                                                                                                                                                                                                                                                                                                                                                                                                                                                                                                                                                                                                                                                                                                            |
|------------------------------------------------------------------------------------------------------------------------------------------------------------------------------------------------------------------------------------------------------------------------------------------------------------------------------------------------------------------------------------------------------------------------------------------------------------------------------------------------------------------------------------------------------------------------------------------------------------------------------------------------------------------------------------------------------------------------------------------------------------------------------------------------------------------------------------------------------------------------------------------------------------------------------------------------------------------------------------------------------------------------------------------------------------------------------------------------------------------------------------------------------------------------------------------------------------------------------------------------------------------------------------------------------------------------------------------------------------------------------------------------------------------------|
| <b>Inclusion criteria</b>                                                                                                                                                                                                                                                                                                                                                                                                                                                                                                                                                                                                                                                                                                                                                                                                                                                                                                                                                                                                                                                                                                                                                                                                                                                                                                                                                                                              |
| <p>Age <math>\geq 18</math> years</p> <p>BMI <math>\geq 28</math> kg/m<sup>2</sup></p> <p>HbA1c <math>\leq 9\%</math> (<math>\leq 10\%</math> in diet or metformin treated only)</p> <p>Fasting C-peptide <math>\geq 500</math> pmol/L</p> <p>Unchanged glycaemic treatment for 3 months prior to inclusion</p> <p>High cardiovascular risk as one of the following:</p> <ul style="list-style-type: none"> <li>• Previous myocardial infarction, stroke or peripheral arterial disease more than 2 months prior to informed consent</li> <li>• Evidence of multi-vessel coronary arterial disease (CAD) but without prior myocardial infarction, if more than 50% stenosis is present, if revascularised (CABG or PCI) more than 2 months prior or if 1 vessel is vascularised and the other with 50% stenosis.</li> <li>• Single vessel CAD without prior myocardial infarction if more than 50% stenosis is present, not revascularised and positive stress test for ischemia.</li> </ul>                                                                                                                                                                                                                                                                                                                                                                                                                           |
| <b>Exclusion criteria</b>                                                                                                                                                                                                                                                                                                                                                                                                                                                                                                                                                                                                                                                                                                                                                                                                                                                                                                                                                                                                                                                                                                                                                                                                                                                                                                                                                                                              |
| <p>Insulin treatment within 3 months from informed consent</p> <p>Type 1 diabetes</p> <p>Psychiatric disorder or mental retardation</p> <p>Drug or alcohol abuse within 3 months from informed consent</p> <p>Poor compliance</p> <p>Anaemia (Hb <math>&lt; 6.4</math> mmol/L) or other blood dyscrasias causing haemolysis or unstable erythrocytes.</p> <p>Indication of liver disease (ALT or Alkaline phosphatase elevation above 3x upper normal limit)</p> <p>Impaired renal function (eGFR <math>&lt; 45</math> ml/min/1.73 m<sup>2</sup>)</p> <p>Anti-obesity medication within 3 months from informed consent</p> <p>Systemic steroid treatment within 6 weeks from informed consent.</p> <p>Any uncontrolled endocrine disorder except T2D</p> <p>Bariatric surgery or other gastrointestinal conditions that may compromise gastrointestinal absorption</p> <p>Peptic ulcer – verified endoscopically</p> <p>Any form of surgery within 3 months of informed consent</p> <p>Acute myocardial infarction, stroke or peripheral arterial disease within 2 months of informed consent.</p> <p>Persistent or permanent atrial fibrillation</p> <p>Inability to undergo experimental procedures including exclusion criteria for CMR scanning:</p> <p>Implantable cardioverter defibrillator/pacemaker</p> <p>Ferromagnetic clips</p> <p>Claustrophobia.</p> <p>Contraindication to glycopyrrolate infusion:</p> |



1  
2  
3  
4  
5  
6  
7  
8  
9  
10  
11  
12  
13  
14  
15  
16  
17  
18  
19  
20  
21  
22  
23  
24  
25  
26  
27  
28  
29  
30  
31  
32  
33  
34  
35  
36  
37  
38  
39  
40  
41  
42  
43  
44  
45  
46  
47  
48  
49  
50  
51  
52  
53  
54  
55  
56  
57  
58  
59  
60

|                                                                                                                                                                                                                                                                                                                                                                                                                                                                                                                                                                                                                                                                                                                                                                                                                                                                                                                                                                                                               |
|---------------------------------------------------------------------------------------------------------------------------------------------------------------------------------------------------------------------------------------------------------------------------------------------------------------------------------------------------------------------------------------------------------------------------------------------------------------------------------------------------------------------------------------------------------------------------------------------------------------------------------------------------------------------------------------------------------------------------------------------------------------------------------------------------------------------------------------------------------------------------------------------------------------------------------------------------------------------------------------------------------------|
| <p>Known closed-angle glaucoma<br/>         known severe prostate hyperplasia<br/>         Tachycardia (HR &gt; 100 at rest)<br/>         Known bladder atony<br/>         Cardia insufficiency or non-congenital pylorus stenosis –verified endoscopically<br/>         Known gastroparesis</p> <p>Contraindications to adenosine:<br/>         2nd or 3rd degree atrioventricular block<br/>         Severe hypotension (BP ≤ 90/50 mmHg)<br/>         Long QT syndrome<br/>         Unstable angina pectoris<br/>         Decompensated heart failure<br/>         Sinus node dysfunction<br/>         Chronic obstructive pulmonary disease or asthma bronchiale (FEV1 ≤ 50% of expected)</p> <p>Allergy towards any of the drugs or diagnostics used in the protocol (insulin, empagliflozin, acipimox, glycopyrrolate, adenosine, gadolinium contrast enhancer).<br/>         Any condition which in the opinion of the investigator may jeopardize subject safety or compliance with the protocol.</p> |
| <p>Withdrawal criteria</p>                                                                                                                                                                                                                                                                                                                                                                                                                                                                                                                                                                                                                                                                                                                                                                                                                                                                                                                                                                                    |
| <p>Subjects may withdraw from the study without any notice or reason<br/>         Pregnancy discovered during the experiment<br/>         Unacceptable adverse reactions or reactions associated with the planned experiments, including severe glycaemic dysregulation during washout periods.</p>                                                                                                                                                                                                                                                                                                                                                                                                                                                                                                                                                                                                                                                                                                           |

|                               |                                                                                                                                                                                                                                                                                           |
|-------------------------------|-------------------------------------------------------------------------------------------------------------------------------------------------------------------------------------------------------------------------------------------------------------------------------------------|
| Box 2: Endpoints              |                                                                                                                                                                                                                                                                                           |
| Primary end point             | Change in left ventricular peak filling rate (ΔLVPFR)                                                                                                                                                                                                                                     |
| Secondary endpoints           | Change in left atrial passive emptying fraction (ΔLAPEF)<br>Change in left ventricular ejection fraction (ΔLVEF)                                                                                                                                                                          |
| Explorative endpoints include | <p>Cardiovascular:<br/>           Change in VO<sub>2</sub>max and exercise tolerance test variables<br/>           Change in central blood volume and haematocrite<br/>           Change in heart rate variability<br/>           Change in left ventricular volume</p> <p>Metabolic:</p> |



|  |                                                                                                                                                                                                                                                                                                                                                                                                                                                                            |
|--|----------------------------------------------------------------------------------------------------------------------------------------------------------------------------------------------------------------------------------------------------------------------------------------------------------------------------------------------------------------------------------------------------------------------------------------------------------------------------|
|  | <p>Basal and postprandial AUC Free Fatty Acids and glycerol turnover</p> <p>Endogenous glucose production and tissue glucose disposal (metabolic clearance of glucose)</p> <p>Fasting and postprandial energy expenditure and respiratory quotient</p> <p>Glucagon-Insulin ratio</p> <p>Insulin sensitivity (AUC glucose metabolic clearance / AUC insulin concentration)</p> <p>Beta-cell function (prehepatic insulin secretion rate, correlated to ambient glucose)</p> |
|--|----------------------------------------------------------------------------------------------------------------------------------------------------------------------------------------------------------------------------------------------------------------------------------------------------------------------------------------------------------------------------------------------------------------------------------------------------------------------------|

|                                    |                                                                                                                                                                                                                                                                                                                                                                              |
|------------------------------------|------------------------------------------------------------------------------------------------------------------------------------------------------------------------------------------------------------------------------------------------------------------------------------------------------------------------------------------------------------------------------|
| <b>Box 3: Screening procedures</b> |                                                                                                                                                                                                                                                                                                                                                                              |
| Blood samples                      | Haematology (haemoglobin, thrombocytes, haematocrit, leukocytes), liver and renal function tests (creatinine, eGFR (Cockcroft-Gault formula), alkaline phosphatases, alanine aminotransferases, lactate dehydrogenase, bilirubin, amylase, sodium, potassium), fasting P-glucose, C-peptide, HbA1c, TSH, Urinary Albumin/creatinine mass ratio, and in fertile women, U-hCG. |
| Echocardiography                   | Parasternal long axis view, parasternal short axis view at aortic, mitral and apex levels, apical 4-chamber view, LVEF, E/E', E', LVEDV/BSA.                                                                                                                                                                                                                                 |
| Estimation of VO <sub>2</sub> max  | Maximum oxygen uptake is estimated using Åström's two-point test performed on a cycle ergometer during indirect calorimetry. From measurements of VO <sub>2</sub> at two sub-maximal pulse rates VO <sub>2</sub> max is estimated by linear extrapolation to the theoretical maximal pulse rate (220-age) [70].                                                              |

1  
2  
3  
4  
5  
6  
7  
8  
9  
10  
11  
12  
13  
14  
15  
16  
17  
18  
19  
20  
21  
22  
23  
24  
25  
26  
27  
28  
29  
30  
31  
32  
33  
34  
35  
36  
37  
38  
39  
40  
41  
42  
43  
44  
45  
46  
47  
48  
49  
50  
51  
52  
53  
54  
55  
56  
57  
58  
59  
60

| Box 4: Visit overview                                                                                                                                                                                                                                                                                                                                                                                                                                                                                                                                                                                                                        |                                                                                                                                                                                                                                                                                                                                                                                                            |                                                                                                                                                                                                                                            |
|----------------------------------------------------------------------------------------------------------------------------------------------------------------------------------------------------------------------------------------------------------------------------------------------------------------------------------------------------------------------------------------------------------------------------------------------------------------------------------------------------------------------------------------------------------------------------------------------------------------------------------------------|------------------------------------------------------------------------------------------------------------------------------------------------------------------------------------------------------------------------------------------------------------------------------------------------------------------------------------------------------------------------------------------------------------|--------------------------------------------------------------------------------------------------------------------------------------------------------------------------------------------------------------------------------------------|
| Metabolic study day                                                                                                                                                                                                                                                                                                                                                                                                                                                                                                                                                                                                                          | Cardiac MR                                                                                                                                                                                                                                                                                                                                                                                                 | Cardiac MR, Acipimox                                                                                                                                                                                                                       |
| <ul style="list-style-type: none"> <li>- DXA-scan and fasting safety and efficacy blood samples</li> <li>- Determination of 3-hour basal metabolism.</li> <li>-- Infusion of glucose and glycerol tracers</li> <li>-- Basal muscle and fat biopsies</li> <li>-- Basal energy expenditure and determination of respiratory quotient</li> <li>- 5-hour OGTT</li> <li>-- with oral glucose tracer and</li> <li>-- continued intravenous glucose and glycerol tracer.</li> <li>-- Fat- and muscle biopsies at maximum insulin stimulation</li> <li>- Exercise test and determination of VO<sub>2</sub>max</li> <li>- Ad libitum meal.</li> </ul> | <ul style="list-style-type: none"> <li>- Fasting blood samples, before and after CMR.</li> <li>- Echocardiography</li> <li>- CMR Rest</li> <li>-- Without enhancement</li> <li>-- With enhancement and adenosine infusion</li> <li>- CMR Stress</li> <li>-- Unenhanced repeated during pharmacological chronotropic stress with glycopyrrolate infusion.</li> <li>- 24h ambulant blood pressure</li> </ul> | <ul style="list-style-type: none"> <li>Same protocol as Cardiac MR day, but during pharmacological suppression of hormone sensitive lipase activity and depletion of plasma free fatty acids.</li> <li>- 48h Holter monitoring.</li> </ul> |

| Box 5: Blood samples on metabolic and CMR study days include |                                                                                                                                                                                                                                   |
|--------------------------------------------------------------|-----------------------------------------------------------------------------------------------------------------------------------------------------------------------------------------------------------------------------------|
| Metabolic study day                                          | <p>Blood samples: glucose, insulin, C-peptide, glucagon, FFAs, triglycerides, total amino acids and ketone bodies, tracers/tracees, gut hormones.</p> <p>HbA1c, urate, blood urea nitrogen, cortisol, is sampled at baseline.</p> |
| Cardiac MRI days                                             | <p>Markers of cardiac function, including pro-ANP and pro-BNP, glucose, insulin, C-peptide, glucagon, FFAs, triglycerides, ketone bodies, haematocrit are drawn before and after CMR.</p>                                         |

## Figure legends

**Figure 1. Study outline.** Included patients undergo a 7 week program of washout of pre-existing antiglycemic treatment (except metformin) and run-in of empagliflozin. Hereafter they are randomized to treatment for  $5\pm 1$  weeks, followed by  $3\pm 1$  weeks wash-out and cross-over to  $5\pm 1$  weeks treatment with the remaining study drug.

**Figure 2. Metabolic profile of the two study drugs.** Schematic representation of the metabolic changes expected with the two study drug treatments in a patient randomized to insulin first. Insulin treatment is characterized by low glucose, low FFAs and high insulin concentrations; empagliflozin treatment by low glucose, high FFAs and low insulin.

## References:

- 1 Defronzo RA. From the Triumvirate to the Ominous Octet : A New Paradigm for the Treatment of Type 2 Diabetes Mellitus. ;:773–95. doi:10.2337/db09-9028
- 2 De Vegt F, Dekker JM, Ruhé HG, *et al.* Hyperglycaemia is associated with all-cause and cardiovascular mortality in the Hoorn population: The Hoorn study. *Diabetologia* 1999;**42**:926–31. doi:10.1007/s001250051249
- 3 Pyorala M, Miettinen H, Laakso M, *et al.* Plasma insulin and all-cause, cardiovascular, and noncardiovascular mortality: the 22-year follow-up results of the Helsinki Policemen Study. *Diabetes Care* 2000;**23**:1097–102. doi:10.2337/diacare.23.8.1097
- 4 Lakka HM, Lakka TA, Tuomilehto J, *et al.* Hyperinsulinemia and the risk of cardiovascular death and acute coronary and cerebrovascular events in men: The Kuopio Ischaemic Heart Disease Risk Factor Study. *Arch Intern Med* 2000;**160**:1160–8. doi:10.1001/archinte.160.8.1160
- 5 Selvin E, Marinopoulos S, Berkenblit G, *et al.* Meta-analysis: Glycosylated hemoglobin and cardiovascular disease in diabetes mellitus. *Ann Intern Med* 2004;**141**. doi:10.7326/0003-4819-141-6-200409210-00007
- 6 Li N, Zhou H. SglT2 inhibitors: A novel player in the treatment and prevention of diabetic cardiomyopathy. *Drug Des Devel Ther* 2020;**14**:4775–88. doi:10.2147/DDDT.S269514
- 7 Roos A De, Radder JK. Diastolic Dysfunction Is Associated With Altered Myocardial Metabolism in Asymptomatic Normotensive Patients With Well-Controlled Type 2 Diabetes Mellitus. 2003;**42**. doi:10.1016/S0735-1097(03)00625-9
- 8 Tarquini R, Lazzeri C, Pala L, *et al.* The diabetic cardiomyopathy. *Acta Diabetol* 2011;**48**:173–81. doi:10.1007/s00592-010-0180-x
- 9 Komi S, Inoue Y, Hata H, *et al.* Cardiovascular magnetic resonance evaluation of left ventricular peak filling rate using steady-state free precession and phase contrast sequences. *Springerplus* 2016;**5**. doi:10.1186/s40064-016-2878-x
- 10 Diamant M, Lamb HJ, Groeneveld Y, *et al.* Diastolic dysfunction is associated with altered myocardial metabolism in asymptomatic normotensive patients with well-controlled type 2 diabetes mellitus. *J Am Coll Cardiol* 2003;**42**:328–35. doi:10.1016/S0735-1097(03)00625-9
- 11 Rosano G, Coats A. Modulation of Cardiac Metabolism in Heart Failure. *Int Cardiovasc Forum J* 2019;**17**:99–103. doi:10.17987/icfj.v17i0.597
- 12 Ungar I, Gilbert M, Siegel A, *et al.* Studies on myocardial metabolism. IV. Myocardial metabolism in diabetes. *Am J Med* 1955;**18**:385–96. doi:10.1016/0002-9343(55)90218-7
- 13 Rijzewijk LJ, van der Meer RW, Lamb HJ, *et al.* Altered myocardial substrate metabolism and decreased diastolic function in nonischemic human diabetic cardiomyopathy: studies with cardiac positron emission tomography and magnetic resonance imaging. *J Am Coll Cardiol* 2009;**54**:1524–32. doi:10.1016/j.jacc.2009.04.074
- 14 Stanley WC, Lopaschuk GD, Hall JL, *et al.* Regulation of myocardial carbohydrate metabolism under normal and ischaemic conditions. Potential for pharmacological interventions. *Cardiovasc Res* 1997;**33**:243–57. doi:10.1016/S0008-6363(96)00245-3
- 15 Mehta SR, Yusuf S, Díaz R, *et al.* Effect of glucose-insulin-potassium infusion on mortality in patients with acute ST-segment elevation myocardial infarction: The CREATE-ECLA randomized controlled trial. *J Am Med Assoc* 2005;**293**:437–46. doi:10.1001/jama.293.4.437
- 16 Malmberg K, Rydén L, Wedel H, *et al.* FASTTRACK intense metabolic control by means of insulin in patients with diabetes mellitus and acute myocardial infarction (DIGAMI 2): Effects on mortality and morbidity. *Eur Heart J* 2005;**26**:650–61. doi:10.1093/eurheartj/ehi199
- 17 Malmberg K, Rydén L, Efendic S, *et al.* Randomized trial of insulin-glucose infusion followed by subcutaneous insulin treatment in diabetic patients with acute myocardial infarction (DIGAMI study): Effects on mortality at 1 year. *J Am Coll Cardiol* 1995;**26**:57–65. doi:10.1016/0735-1097(95)00126-K
- 18 NICE-SUGAR Study Investigators, Finfer S, Chittock DR, *et al.* Intensive versus conventional glucose control in critically ill patients. *N Engl J Med* 2009;**360**:1283–97. doi:10.1056/NEJMoa0810625

- 1  
2  
3  
4 19 Hemmingsen B, Lund SS, Gluud C, *et al.* Intensive glycaemic control for patients with type  
5 2 diabetes: systematic review with meta-analysis and trial sequential analysis of randomised  
6 clinical trials. *BMJ*  
7 2011;**343**:d6898. [http://www.pubmedcentral.nih.gov/articlerender.fcgi?artid=3223424&tool=](http://www.pubmedcentral.nih.gov/articlerender.fcgi?artid=3223424&tool=pmcentrez&rendertype=abstract)  
8 [pmcentrez&rendertype=abstract](http://www.pubmedcentral.nih.gov/articlerender.fcgi?artid=3223424&tool=pmcentrez&rendertype=abstract) (accessed 9 Sep 2015).
- 9 20 Duckworth W, Abraira C, Moritz T, *et al.* Glucose control and vascular complications in  
10 veterans with type 2 diabetes. *N Engl J Med* 2009;**360**:129–39.  
11 doi:10.1056/NEJMoa0808431
- 12 21 ADVANCE Collaborative Group, Patel A, MacMahon S, *et al.* Intensive blood glucose  
13 control and vascular outcomes in patients with type 2 diabetes. *N Engl J Med*  
14 2008;**358**:2560–72. doi:10.1056/NEJMoa0802987
- 15 22 Basal Insulin and Cardiovascular and Other Outcomes in Dysglycemia. *N Engl J Med*  
16 2012;**367**:319–28. doi:10.1056/nejmoa1203858
- 17 23 Action to Control Cardiovascular Risk in Diabetes Study Group, Gerstein HC, Miller ME, *et*  
18 *al.* Effects of intensive glucose lowering in type 2 diabetes. *N Engl J Med* 2008;**358**:2545–  
19 59. doi:10.1056/NEJMoa0802743
- 20 24 Sciences HH, Miller ME, Byington RP, *et al.* Effects of Intensive Glucose Lowering in Type  
21 2 Diabetes. *N Engl J Med* 2008;**358**:2545–59. doi:10.1056/nejmoa0802743
- 22 25 Zinman B, Wanner C, Lachin JM, *et al.* Empagliflozin, Cardiovascular Outcomes, and  
23 Mortality in Type 2 Diabetes. *N Engl J Med* 2015;**373**:2117–28.  
24 doi:10.1056/NEJMoa1504720
- 25 26 McMurray JJV, Solomon SD, Inzucchi SE, *et al.* Dapagliflozin in Patients with Heart Failure  
26 and Reduced Ejection Fraction. *N Engl J Med* 2019;**381**:1995–2008.  
27 doi:10.1056/nejmoa1911303
- 28 27 Zou CY, Liu XK, Sang YQ, *et al.* Effects of SGLT2 inhibitors on cardiovascular outcomes  
29 and mortality in type 2 diabetes: A meta-analysis. *Med (United States)* 2019;**98**.  
30 doi:10.1097/MD.00000000000018245
- 31 28 Ferrannini E, Muscelli E, Frascerra S, *et al.* Metabolic response to sodium-glucose  
32 cotransporter 2 inhibition in type 2 diabetic patients. *J Clin Invest* 2014;**124**:499–508.  
33 doi:10.1172/JCI72227
- 34 29 Merovci A, Solis-Herrera C, Daniele G, *et al.* Dapagliflozin improves muscle insulin  
35 sensitivity but enhances endogenous glucose production. *J Clin Invest* 2014;**124**:509–14.  
36 doi:10.1172/JCI70704
- 37 30 Ferrannini E, Baldi S, Frascerra S, *et al.* Renal Handling of Ketones in Response to Sodium –  
38 Glucose Cotransporter 2 Inhibition in Patients With Type 2 Diabetes. 2017;**40**:771–6.  
39 doi:10.2337/dc16-2724
- 40 31 Chilton R, Tikkanen I, Cannon CP, *et al.* Effects of empagliflozin on blood pressure and  
41 markers of arterial stiffness and vascular resistance in patients with type 2 diabetes. *Diabetes*  
42 *Obes Metab* 2015;**17**:1180–93. doi:10.1111/dom.12572
- 43 32 Trum M, Riechel J, Lebek S, *et al.* Empagliflozin inhibits Na<sup>+</sup>/H<sup>+</sup> exchanger activity in  
44 human atrial cardiomyocytes. 2020;**44**:29–37. doi:10.1002/ehf2.13024
- 45 33 Baartscheer A, Schumacher CA, Wüst RCI, *et al.* Empagliflozin decreases myocardial  
46 cytoplasmic Na<sup>+</sup> through inhibition of the cardiac Na<sup>+</sup>/H<sup>+</sup> exchanger in rats and rabbits.  
47 2017;**568**–73. doi:10.1007/s00125-016-4134-x
- 48 34 Garvey WT, Gaal L Van, Leiter LA, *et al.* Effects of canagliflozin versus glimepiride on  
49 adipokines and inflammatory biomarkers in type 2 diabetes ☆. 2018;**85**:32–7.  
50 doi:10.1016/j.metabol.2018.02.002
- 51 35 Heerspink HJL, Perco P, Mulder S, *et al.* Canagliflozin reduces inflammation and fibrosis  
52 biomarkers : a potential mechanism of action for beneficial effects of SGLT2 inhibitors in  
53 diabetic kidney disease. 2019;**1154**–66.
- 54 36 Lauritsen KM, Nielsen BRR, Tolbod LP, *et al.* SGLT2 Inhibition Does Not Affect  
55 Myocardial Fatty Acid Oxidation or Uptake, But Reduces Myocardial Glucose Uptake and  
56 Blood Flow in Individuals With Type 2 Diabetes– a Randomized Double-Blind, Placebo-  
57 Controlled Crossover Trial. *Diabetes* 2020;**db200921**. doi:10.2337/db20-0921
- 58 37 Ferrannini E, Muscelli E, Frascerra S, *et al.* Metabolic response to sodium-glucose
- 59  
60



1  
2  
3  
4  
5  
6  
7  
8  
9  
10  
11  
12  
13  
14  
15  
16  
17  
18  
19  
20  
21  
22  
23  
24  
25  
26  
27  
28  
29  
30  
31  
32  
33  
34  
35  
36  
37  
38  
39  
40  
41  
42  
43  
44  
45  
46  
47  
48  
49  
50  
51  
52  
53  
54  
55  
56  
57  
58  
59  
60

cotransporter 2 inhibition in type 2 diabetic patients. *J Clin Invest* 2014;**124**:499–508.  
doi:10.1172/JCI72227

38 Jørgensen NB, Pedersen J, Vaag AA. EMPA-REG: Glucose excretion and lipid mobilization – not storage – saves lives. *J Diabetes Complications* 2016;**30**:753.  
doi:10.1016/j.jdiacomp.2016.02.015

39 Ekanayake P, Hupfeld C, Mudaliar S. Sodium-Glucose Cotransporter Type 2 (SGLT-2) Inhibitors and Ketogenesis: the Good and the Bad. *Curr Diab Rep* 2020;**20**.  
doi:10.1007/s11892-020-01359-z

40 Ferrannini E, Mark M, Mayoux E. CV protection in the EMPA-REG OUTCOME trial: A thrifty substrate hypothesis. *Diabetes Care* 2016;**39**:1108–14. doi:10.2337/dc16-0330

41 Santos-Gallego CG, Requena-Ibanez JA, San Antonio R, *et al*. Empagliflozin Ameliorates Adverse Left Ventricular Remodeling in Nondiabetic Heart Failure by Enhancing Myocardial Energetics. *J Am Coll Cardiol* 2019;**73**:1931–44. doi:10.1016/j.jacc.2019.01.056

42 Wolf P, Winhofer Y, Krssak M, *et al*. Suppression of plasma free fatty acids reduces myocardial lipid content and systolic function in type 2 diabetes. *Nutr Metab Cardiovasc Dis* 2016;**26**:387–92. doi:10.1016/j.numecd.2016.03.012

43 Tuunanen H, Engblom E, Naum A, *et al*. Free fatty acid depletion acutely decreases cardiac work and efficiency in cardiomyopathic heart failure. *Circulation* 2006;**114**:2130–7. doi:10.1161/CIRCULATIONAHA.106.645184

44 Harmancey R, Vasquez HG, Guthrie PH, *et al*. Decreased long-chain fatty acid oxidation impairs postischemic recovery of the insulin-resistant rat heart. *FASEB J* 2013;**27**:3966–78. doi:10.1096/fj.13-234914

45 Harmancey R, Lam TN, Lubrano GM, *et al*. Insulin resistance improves metabolic and contractile efficiency in stressed rat heart. *FASEB J* 2012;**26**:3118–26. doi:10.1096/fj.12-208991

46 Zinman B, Inzucchi SE, Lachin JM, *et al*. Rationale, design, and baseline characteristics of a randomized, placebo-controlled cardiovascular outcome trial of empagliflozin (EMPA-REG OUTCOME™). *Cardiovasc Diabetol* 2014;**13**:102. doi:10.1186/1475-2840-13-102

47 Ahtarovski K a, Iversen KK, Lønborg JT, *et al*. Left atrial and ventricular function during dobutamine and glycopyrrolate stress in healthy young and elderly as evaluated by cardiac magnetic resonance. *Am J Physiol Heart Circ Physiol* 2012;**303**:H1469-73. doi:10.1152/ajpheart.00365.2012

48 Flint a, Raben a, Blundell JE, *et al*. Reproducibility, power and validity of visual analogue scales in assessment of appetite sensations in single test meal studies. *Int J Obes Relat Metab Disord* 2000;**24**:38–48. <http://www.ncbi.nlm.nih.gov/pubmed/10702749>

49 Wolf P, Winhofer Y, Krssak M, *et al*. Suppression of plasma free fatty acids reduces myocardial lipid content and systolic function in type 2 diabetes. *Nutr Metab Cardiovasc Dis* 2016;**26**:387–92. doi:10.1016/j.numecd.2016.03.012

50 Grothues F, Smith GC, Moon JCC, *et al*. Comparison of interstudy reproducibility of cardiovascular magnetic resonance with two-dimensional echocardiography in normal subjects and in patients with heart failure or left ventricular hypertrophy. *Am J Cardiol* 2002;**90**:29–34. doi:10.1016/S0002-9149(02)02381-0

51 Morton G, Jogiya R, Plein S, *et al*. Quantitative cardiovascular magnetic resonance perfusion imaging: Inter-study reproducibility. *Eur Heart J Cardiovasc Imaging* 2012;**13**:954–60. doi:10.1093/ehjci/jes103

52 Ahtarovski KA, Iversen KK, Lønborg JT, *et al*. Left atrial and ventricular function during dobutamine and glycopyrrolate stress in healthy young and elderly as evaluated by cardiac magnetic resonance. *Am J Physiol - Hear Circ Physiol* 2012;**303**:1469–73. doi:10.1152/ajpheart.00365.2012

53 Kumarathurai P, Anholm C, Larsen BS, *et al*. Effects of liraglutide on heart rate and heart rate variability: A randomized, double-blind, placebo-controlled crossover study. *Diabetes Care* 2017;**40**:117–24. doi:10.2337/dc16-1580

54 Ferrannini E, Mark M, Mayoux E. CV Protection in the EMPA-REG OUTCOME Trial: A “Thrifty Substrate” Hypothesis. *Diabetes Care* 2016;**39**:1108–14. doi:10.2337/dc16-0330

- 1  
2  
3  
4 55 Jørgensen NB, Pedersen J, Vaag AA. EMPA-REG: Glucose excretion and lipid mobilization - not storage - saves lives. *J Diabetes Complications* 2016;**30**:753. doi:10.1016/j.jdiacomp.2016.02.015
- 56 The Lancet Diabetes Endocrinology. Getting to the heart of the matter in type 2 diabetes. *lancet Diabetes Endocrinol* 2015;**3**:827. doi:10.1016/S2213-8587(15)00384-8
- 57 DeFronzo RA. The EMPA-REG study: What has it told us? A diabetologist's perspective. *J Diabetes Complications* 2016;**30**:1–2. doi:10.1016/j.jdiacomp.2015.10.013
- 58 Nirengi S, Peres Valgas da Silva C, Stanford KI. Disruption of energy utilization in diabetic cardiomyopathy; a mini review. *Curr. Opin. Pharmacol.* 2020;**54**:82–90. doi:10.1016/j.coph.2020.08.015
- 59 DeFronzo RA. Banting Lecture. From the triumvirate to the ominous octet: a new paradigm for the treatment of type 2 diabetes mellitus. *Diabetes* 2009;**58**:773–95. doi:10.2337/db09-9028
- 60 Merovci A, Solis-Herrera C, Daniele G, *et al.* Dapagliflozin improves muscle insulin sensitivity but enhances endogenous glucose production. *J Clin Invest* 2014;**124**:509–14. doi:10.1172/JCI70704
- 61 Stanley WC, Lopaschuk GD, McCormack JG. Regulation of energy substrate metabolism in the diabetic heart. *Cardiovasc Res* 1997;**34**:25–33. <http://www.ncbi.nlm.nih.gov/pubmed/9217869> (accessed 3 Feb 2016).
- 62 Nolan CJ, Ruderman NB, Kahn SE, *et al.* Insulin resistance as a physiological defense against metabolic stress: implications for the management of subsets of type 2 diabetes. *Diabetes* 2015;**64**:673–86. doi:10.2337/db14-0694
- 63 Taegtmeier H, Beuloye C, Harmancey R, *et al.* Comment on Nolan et al. Insulin Resistance as a Physiological Defense Against Metabolic Stress: Implications for the Management of Subsets of Type 2 Diabetes. *Diabetes* 2015;**64**:673–686. *Diabetes* 2015;**64**:e37. doi:10.2337/db15-0655
- 64 Taegtmeier H, Beuloye C, Harmancey R, *et al.* Insulin resistance protects the heart from fuel overload in dysregulated metabolic states. *Am J Physiol Heart Circ Physiol* 2013;**305**:H1693-7. doi:10.1152/ajpheart.00854.2012
- 65 Rau M, Thiele K, Hartmann NUK, *et al.* Empagliflozin does not change cardiac index nor systemic vascular resistance but rapidly improves left ventricular filling pressure in patients with type 2 diabetes: a randomized controlled study. *Cardiovasc Diabetol* 2021;**20**. doi:10.1186/s12933-020-01175-5
- 66 Lauritsen KM, Nielsen BRR, Tolbod LP, *et al.* SGLT2 Inhibition Does Not Affect Myocardial Fatty Acid Oxidation or Uptake, But Reduces Myocardial Glucose Uptake and Blood Flow in Individuals With Type 2 Diabetes— a Randomized Double-Blind, Placebo-Controlled Crossover Trial. *Diabetes* 2020;**70**:db200921. doi:10.2337/db20-0921
- 67 Oldgren J, Laurila S, Åkerblom A, *et al.* Effects of 6 weeks treatment with dapagliflozin, a sodium-glucose co-transporter 2 inhibitor, on myocardial function and metabolism in patients with type 2 diabetes: a randomized placebo-controlled exploratory study. *Diabetes, Obes Metab* 2021;:dom.14363. doi:10.1111/dom.14363
- 68 Hiruma S, Shigiyama F, Hisatake S, *et al.* A prospective randomized study comparing effects of empagliflozin to sitagliptin on cardiac fat accumulation, cardiac function, and cardiac metabolism in patients with early-stage type 2 diabetes: the ASSET study. *Cardiovasc Diabetol* 2021;**20**. doi:10.1186/s12933-021-01228-3
- 69 Deacon CF. A review of dipeptidyl peptidase-4 inhibitors. Hot topics from randomized controlled trials. *Diabetes, Obes. Metab.* 2018;**20**:34–46. doi:10.1111/dom.13135
- 70 Nordsborg N, Timmerman M. *Testmanual - patientinterview og konditionstest.* 2.0. København: : Sundhedsstyrelsen 2006.



1  
2  
3  
4  
5  
6  
7  
8  
9  
10  
11  
12  
13  
14  
15  
16  
17  
18  
19  
20  
21  
22  
23  
24  
25  
26  
27  
28  
29  
30  
31  
32  
33  
34  
35  
36  
37  
38  
39  
40  
41  
42  
43  
44  
45  
46  
47  
48  
49  
50  
51  
52  
53  
54  
55  
56  
57  
58  
59  
60

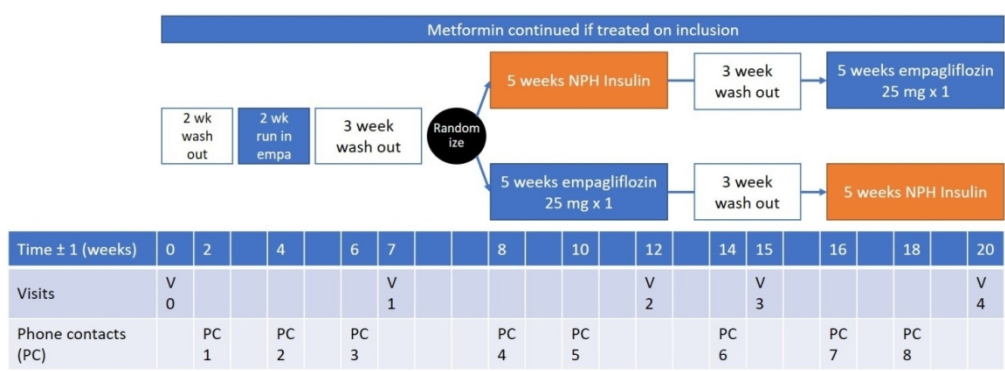

Figure 1. Study outline

169x61mm (220 x 220 DPI)

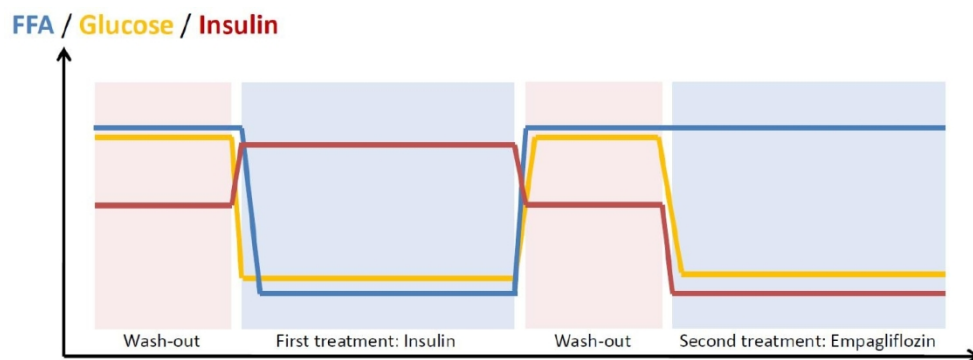

Figure 2. Metabolic profile of the two study drugs

407x150mm (96 x 96 DPI)

# BMJ Open

## THE ROLE OF HYPERGLYCEMIA, HYPERINSULINEMIA AND ELEVATED FREE FATTY ACIDS FOR CARDIAC FUNCTION IN PATIENTS WITH TYPE 2 DIABETES - THE HYPERCARD2 STUDY

|                                 |                                                                                                                                                                                                                                                                                                                                                                                                                                                                                                                                                                                                                                                                                                                                                                                                                                                                                                                                                                                                                                                                                                                      |
|---------------------------------|----------------------------------------------------------------------------------------------------------------------------------------------------------------------------------------------------------------------------------------------------------------------------------------------------------------------------------------------------------------------------------------------------------------------------------------------------------------------------------------------------------------------------------------------------------------------------------------------------------------------------------------------------------------------------------------------------------------------------------------------------------------------------------------------------------------------------------------------------------------------------------------------------------------------------------------------------------------------------------------------------------------------------------------------------------------------------------------------------------------------|
| Journal:                        | <i>BMJ Open</i>                                                                                                                                                                                                                                                                                                                                                                                                                                                                                                                                                                                                                                                                                                                                                                                                                                                                                                                                                                                                                                                                                                      |
| Manuscript ID                   | bmjopen-2021-054100.R1                                                                                                                                                                                                                                                                                                                                                                                                                                                                                                                                                                                                                                                                                                                                                                                                                                                                                                                                                                                                                                                                                               |
| Article Type:                   | Protocol                                                                                                                                                                                                                                                                                                                                                                                                                                                                                                                                                                                                                                                                                                                                                                                                                                                                                                                                                                                                                                                                                                             |
| Date Submitted by the Author:   | 21-Mar-2022                                                                                                                                                                                                                                                                                                                                                                                                                                                                                                                                                                                                                                                                                                                                                                                                                                                                                                                                                                                                                                                                                                          |
| Complete List of Authors:       | Thirumathyam, Roopameera; Hvidovre Hospital, Department of Endocrinology<br>Richter, Erik; University of Copenhagen, Department of Nutrition, Exercise and Sports, Section of Molecular Physiology, Faculty of Science<br>Goetze, Jens; University of Copenhagen, Department of Clinical Biochemistry, Rigshospitalet<br>Fenger, Mogens; Hvidovre Hospital, Department of Clinical Biochemistry<br>Van Hall, Gerrit; Rigshospitalet, Clinical Metabolomics Core Facility, Clinical Biochemistr; University of Copenhagen, Department of Biomedical Sciences, Faculty of Health Sciences<br>Dixen, Ulrik; Hvidovre University Hospital, Department of cardiology<br>Holst, Jens; University of Copenhagen, NovoNordisk Center for Basic Metabolic Research; University of Copenhagen, Department of Biomedical Sciences, Faculty of Health Sciences<br>Madsbad, Sten; Hvidovre Hospital, Department of Endocrinology<br>Vejlstrup, Niels; Rigshospitalet, Department of Cardiology<br>Madsen, Per; Herlev Hospital, Department of Cardiology<br>Jørgensen, Nils Bruun; Hvidovre Hospital, Department of Endocrinology |
| <b>Primary Subject Heading</b>: | Cardiovascular medicine                                                                                                                                                                                                                                                                                                                                                                                                                                                                                                                                                                                                                                                                                                                                                                                                                                                                                                                                                                                                                                                                                              |
| Secondary Subject Heading:      | Diabetes and endocrinology                                                                                                                                                                                                                                                                                                                                                                                                                                                                                                                                                                                                                                                                                                                                                                                                                                                                                                                                                                                                                                                                                           |
| Keywords:                       | Coronary heart disease < CARDIOLOGY, Ischaemic heart disease < CARDIOLOGY, Myocardial infarction < CARDIOLOGY, Diabetic nephropathy & vascular disease < DIABETES & ENDOCRINOLOGY, DIABETES & ENDOCRINOLOGY                                                                                                                                                                                                                                                                                                                                                                                                                                                                                                                                                                                                                                                                                                                                                                                                                                                                                                          |
|                                 |                                                                                                                                                                                                                                                                                                                                                                                                                                                                                                                                                                                                                                                                                                                                                                                                                                                                                                                                                                                                                                                                                                                      |

SCHOLARONE™  
Manuscripts

**TITLE**

THE ROLE OF HYPERGLYCEMIA, HYPERINSULINEMIA AND ELEVATED FREE FATTY ACIDS FOR CARDIAC FUNCTION IN PATIENTS WITH TYPE 2 DIABETES - THE HYPERCARD2 STUDY

Short title: The HyperCarD2 study

**AUTHORS:**

Roopameera Thirumathyam<sup>1</sup>, Erik A. Richter<sup>2</sup>, Jens P. Goetze<sup>3</sup>, Mogens Fenger<sup>4</sup>, Gerrit van Hall<sup>5,8</sup>, Ulrik Dixen<sup>6</sup>, Jens Juul Holst<sup>7,8</sup>, Sten Madsbad<sup>1</sup>, Niels Vejstrup<sup>9</sup>, Per Lav Madsen<sup>10</sup>, Nils Bruun Jørgensen<sup>1</sup>

**AUTHOR AFILIATIONS:**

1. Department of Endocrinology, Hvidovre Hospital, Hvidovre, Denmark
2. Department of Nutrition, Exercise and Sports, Section of Molecular Physiology, Faculty of Science, Copenhagen, Denmark.
3. Department of Clinical Biochemistry, Rigshospitalet, University of Copenhagen, Denmark.
4. Department of Clinical Biochemistry, Hvidovre Hospital, Denmark
5. Clinical Metabolomics Core Facility, Clinical Biochemistry, Rigshospitalet, Denmark
6. Department of Cardiology. Hvidovre Hospital, Denmark
7. Novo Nordisk Center for Basic Metabolic Research
8. Department of Biomedical Sciences, Faculty of Health Sciences, University of Copenhagen, Denmark
9. Department of Cardiology, Rigshospitalet, Copenhagen, Denmark
10. Department of Cardiology, Herlev Hospital, Herlev, Denmark

CORRESPONDING AUTHOR: Nils Bruun Jørgensen – email: [nils.bruun.joergensen@regionh.dk](mailto:nils.bruun.joergensen@regionh.dk)

WORD COUNT: Max 4000 words

## ABSTRACT

Introduction: Type 2 diabetes (T2D) is characterised by elevated plasma glucose, free fatty acid (FFA) and insulin concentrations, and this metabolic profile is linked to diabetic cardiomyopathy, a diastolic dysfunction at first, and increased cardiovascular disease (CVD) risk. Shifting cardiac metabolism towards glucose utilisation has been suggested to improve cardiovascular function and CVD risk, but insulin treatment increases overall glucose oxidation and lowers lipid oxidation, without reducing CVD risk, whereas SGLT-2 inhibitors (SGLT-2i) increase FFA, ketone body concentrations and lipid oxidation while decreasing insulin concentrations and CVD risk. The aim of the present study is to elucidate the importance of different metabolic profiles obtained during treatment with a SGLT2i versus insulin for myocardial function in patients with T2D.

Methods and analyses: Randomised, cross-over study, where 20 patients with T2D and BMI >28 kg/m<sup>2</sup> receive 25 mg empagliflozin qd or NPH insulin bid first for 5 weeks followed by a 3-week washout before crossing over to the remaining treatment. Insulin treatment is titrated to achieve similar glycaemic control as with empagliflozin. In those randomised to insulin first, glycaemia during an initial empagliflozin run-in period prior to randomisation serves as target glucose. Metabolic and cardiac evaluation is performed before and at the end of each treatment period.

The primary endpoint is change (treatment – washout) in left ventricular peak filling rate, as assessed by cardiac MR (CMR) with and without acute lowering of plasma FFAs with acipimox. Secondary and explorative endpoints are changes in left atrial passive emptying fraction, left ventricular ejection fraction, central blood volume and metabolic parameters.

Ethics and dissemination: This study is approved by the Danish Medicines Agency, the Danish Data Protection Agency and the Capital Region Ethics Committee. The trial is conducted in accordance with ICH-GCP guidelines and the Helsinki Declaration. Trial registration number: EudraCT: 2017-002101.

## STRENGTHS AND LIMITATIONS

- Comparison with NPH Insulin, which has opposite metabolic effects to empagliflozin, provides a strong basis for detecting metabolic effects on cardiac function.
- Repeated cardiac MR, during depletion of plasma FFAs with acipimox during treatments and washouts allows for dissection of the individual roles of hyperglycaemia, hyperinsulinemia and elevated free fatty acids on cardiac function in T2D.
- A cross-over over design is vulnerable to dropout, but provides greater statistical power
- Effects of metabolic changes on cardiac function are limited to the 5-week intervention period, which excludes effects arising from longer-term treatment.

## INTRODUCTION

Type 2 diabetes (T2D) is characterised by hyperglycaemia, hyperinsulinemia, increased free fatty acids and impaired tissue glucose uptake and oxidation [1]. T2D is associated with an increased cardiovascular morbidity, and the more dysregulated the metabolic state, the greater the cardiovascular risk [2–5]. T2D develops when insulin secretion can no longer compensate for the ambient insulin resistance, and therefore previous treatments has focused on increasing insulin signalling by either exogenous insulin administration, stimulation of endogenous insulin secretion or enhancing insulin sensitivity [1].

Diabetic cardiomyopathy (DCM), is an early “silent” complication to T2D, independent of hypertension and/or coronary heart disease. It is characterised by left ventricular (LV) hypertrophy and diastolic dysfunction [6,7] and has been linked to the increased cardiovascular risk in T2D [8]. DCM may be accurately described by measuring left ventricular peak filling rate (LVPFR) and left ventricular ejection fraction (LVEF) using cardiac magnetic resonance imaging (CMR) [9,10]. Both diastole and systole are energy requiring processes and sensitive to changes in energy availability [11,12]. Interestingly, cardiac metabolism in patients with T2D is altered and depends more on lipid oxidation and less on glucose oxidation compared to non-diabetic controls [13,14]. It has been argued that glucose oxidation is a better source of energy for the heart than lipid oxidation, especially during stress such as myocardial ischemia, because this yields more ATP pr. unit oxygen [15]. However, manipulating cardiac metabolism towards glucose oxidation, by administering glucose-insulin (-potassium) infusions in patients with hyperglycaemia and myocardial infarction has been attempted, but did not improve survival in neither diabetic nor non-diabetic patients [16–18]. In intensive care unit patients, strict glycaemic control using insulin has been associated with increased mortality [19], and in patients with T2D and increased CVD risk, intensive glycaemic control has not reduced CVD risk compared to conventional glycaemic control [20–23] and in the ACCORD study, which involved aggressive insulin treatment resulted in excess mortality [24]. Thus, insulin treatment does not prevent cardiovascular events in patients with T2D nor improve prognosis when such occur [25].

SGLT2-inhibition (SGLT2i), on the other hand, is a newer treatment principle in T2D, which has proven effective in attenuating the risk of myocardial infarctions, worsening of heart failure, cardiovascular mortality and all-cause mortality in patients with T2D [26–28]

SGLT2i increases renal glucose excretion thereby lowering plasma glucose and insulin levels and increasing glucagon release, lipolysis and ketogenesis [29,30]. Additionally, tissue glucose uptake and oxidation is reduced and hepatic glucose production increased [31]. The exact cardioprotective mechanisms of SGLT2i are not yet understood, but has been proposed to be linked to improved haemodynamics [32], inhibition of myocardial  $\text{Na}^+/\text{H}^+$  exchange [33,34] or reductions in inflammatory activity [35,36].

An early and interesting hypothesis proposed that changes in cardiac metabolism may be responsible for the cardioprotective effect of SGLT2i. The lowered glucose and insulin

1  
2  
3  
4 concentrations, persistent hyperketonaemia and elevated free fatty acids, caused by SGLT2i  
5 treatment, leads to reduced glucose uptake, increased ketone body uptake and oxidation and  
6 unchanged uptake of free fatty acids in the heart while overall lipid oxidation is increased [37,38].  
7 This altered energy metabolism may rapidly improve myocardial function, especially during  
8 myocardial stress [39–42]. The SGLT2i induced myocardial fuel switch from glucose to fatty acids  
9 and ketone bodies, has been suggested to ameliorate adverse cardiac remodelling and heart failure  
10 in nondiabetic porcine models [43], and it is noteworthy that eliminating the availability of free  
11 fatty acids to insulin resistant hearts can lead to cardiac dysfunction in rodents and in humans,  
12 suggesting an important role for lipid metabolism in cardiac function [44–47]. Cardiovascular  
13 endpoint trials with SGLT2 inhibitors have shown effects within weeks after initiation of treatment,  
14 coinciding with the metabolic effects of the treatment [26,38]  
15  
16  
17  
18  
19

20 Altogether, SGLT2 inhibitors “amplify” some components of the dysmetabolic profile of T2D and  
21 works opposite the metabolic effects of insulin. This raises the question of how cardiac function in  
22 patients with T2D depends on lipid and glucose oxidation in the resting state and during stress, and  
23 how increasing or lowering blood glucose, free fatty acids, ketone bodies and insulin concentrations  
24 influence cardiac function.  
25  
26  
27

#### 28 Objective

29 The primary objective of the present study is to evaluate myocardial function in patients with T2D  
30 and high risk of CV events using advanced cardiac magnetic resonance imaging (CMR) scans  
31 during rest, chronotropic stress and under depletion of plasma free fatty acids before and after 5  
32 weeks of empagliflozin treatment (high free fatty acid and ketone body concentrations, high lipid  
33 oxidation and low insulin concentrations) and before and after 5 weeks of human insulin treatment  
34 titrated to yield glycaemic control similar to the empagliflozin treatment period (low free fatty acid  
35 and ketone body concentrations, high insulin concentrations and glucose oxidation).  
36  
37  
38  
39  
40

#### 41 Hypothesis

42 We hypothesise that hyperinsulinemia and hyperglycaemia are conditions that negatively affect  
43 cardiac function in T2D, while the availability of free fatty acids and ketone bodies and switching  
44 metabolism towards lipid oxidation improves cardiac diastolic and systolic function. Thus, we  
45 expect that lowering plasma glucose insulin-independently, and increasing fatty acid  
46 concentrations, lipid oxidation and ketone body availability with empagliflozin treatment, improves  
47 myocardial function in patients with T2D, and that depleting plasma of free fatty acids during  
48 empagliflozin treatment will impair cardiac function.  
49  
50  
51  
52

## 53 METHODS AND ANALYSES

### 54 Design

55 This is a 20-week prospective, investigator-initiated, comparator controlled, open label, 2-arm  
56 cross-over, human study where subjects are randomised in blocks of 3-5 to NPH insulin or  
57 Empagliflozin treatment (25 mg once daily) for 5±1 weeks, followed by 3±1 weeks wash-out and  
58  
59  
60



1  
2  
3  
4 cross-over of treatment for  $5\pm 1$  weeks (figure 1). For 7 weeks preceding randomisation, but after  
5 inclusion, patients undergo a program of 2 weeks of washout of pre-existing antiglycaemic  
6 treatment (except metformin), 2 weeks of empagliflozin run-in (used for glycaemic target and  
7 titration of treatment in participants randomised to insulin first, see below) followed by 3 weeks of  
8 wash-out. During run-in and treatment periods, participants measure blood glucose twice daily  
9 (fasting and before evening meal), and during washouts patients measure fasting blood glucose.  
10 After the screening visit (V0) there are four study visits (V1-4) – before and at the end of each  
11 treatment period. Each visit consists of three study days – a metabolic study day (MET) and two  
12 CMR study days. Randomisation is performed at V1 after the metabolic study day.  
13  
14  
15

### 16 17 Participants

18 Twenty subjects older than 18 years diagnosed with T2D, a BMI  $\geq 28$  kg/m<sup>2</sup>, HbA1c  $\leq 9\%$ , fasting  
19 C-peptide  $>500$  pmol/L and unchanged antiglycaemic treatment for 12 weeks prior to screening,  
20 and who are at a risk of cardiovascular disease (CVD), are eligible for the study. High CVD risk is  
21 modified from the EMPA-REG protocol [48]. Inclusion, exclusion and withdrawal criteria are listed  
22 in Box 1.  
23  
24

### 25 26 Recruitment

27 Participants are recruited from the Department of Endocrinology and Cardiology at Hvidovre  
28 Hospital and are identified by reviewing laboratory results and patient files. Potential participants  
29 will be contacted by means of a recruitment letter, in which they are informed of the opportunity to  
30 participate in a scientific research project. We also will advertise for participant in local newspapers  
31 and on the internet as well as social media (e.g. [www.forsogsperson.dk](http://www.forsogsperson.dk); [www.sundhed.dk](http://www.sundhed.dk) and  
32 [www.facebook.com](http://www.facebook.com)).  
33  
34  
35

### 36 37 Outcomes

38 The primary outcome is change in myocardial diastolic function. This was chosen because firstly,  
39 diastole is a highly energy requiring process [11,12], and secondly, because diastolic dysfunction  
40 (with or without LV hypertrophy) is the notable early manifestation of diabetic cardiomyopathy  
41 [49]. Thus, if changes in overall energy metabolism are to affect cardiac function in patients with  
42 T2D, it may well occur in diastole at the earliest. Diastolic cardiac function can be accurately  
43 assessed using CMR by measuring left ventricular peak filling rate (LVPFR) and left atrial passive  
44 emptying fraction (LAPEF) [50]. Our primary outcome measure is change (LVPFR<sub>treatment</sub> –  
45 LVPFR<sub>wash-out</sub>) in LVPFR ( $\Delta$ LVPFR). All endpoints are listed in Box 2.  
46  
47  
48  
49  
50

### 51 52 Randomisation and intervention

53 Participants are randomised consecutively by lottery in blocks of 3-5 to treatment with either  
54 subcutaneous NPH insulin (Insulatard®) twice daily or oral empagliflozin (Jardiance®) 25 mg once  
55 daily first. All patient will receive both treatments during the trial. Randomisation is performed at  
56 V1. NPH insulin is initiated at a dose of 0.2 IU/kg body weight/day and is titrated daily over phone  
57 (phone contacts, figure 1) by 0.05 IU/kg body weight/day until average blood glucose over three  
58 consecutive days is within  $\pm 1$  mmol/L of the individual glycaemic target. In participants  
59  
60

1  
2  
3  
4 randomised to insulin first, the glycaemic target is average fasting and evening glucose  
5 concentrations during the second week of empagliflozin run-in. In patients randomised to insulin  
6 second, the glycaemic target is average fasting and pre-prandial evening BG values of week 3 and 4  
7 during the first (empagliflozin) treatment period.

8  
9 As previously discussed, insulin and empagliflozin represents two metabolically opposing methods  
10 for lowering plasma glucose concentrations. By titrating insulin treatment to match the glycaemic  
11 control found with empagliflozin in the same participants, the result is two distinct metabolic  
12 phenotypes: one with hyperinsulinemia and suppressed levels of FFAs (NPH insulin treatment), and  
13 one with reduced insulin levels and increased levels of FFAs (empagliflozin treatment) - but both  
14 with the same levels of glycaemic control (Figure 2). NPH Insulin has been chosen over more  
15 modern human insulin analogues, as it is not albumin bound and can be measured in an ordinary  
16 insulin assay.  
17  
18  
19

### 20 Safety considerations

21 During washout periods blood glucose concentrations will increase – that is a separate point of the  
22 study, but severely dysregulated diabetes is an exclusion criterium to ensure participant safety. The  
23 risk of severe hyperglycaemia is reduced in several ways in the study:  
24

- 25 • Existing metformin treatment is continued throughout the whole study as background  
26 antiglycaemic treatment.
- 27 • In case of fasting BG concentrations of more than 13 mmol/L, patients are instructed to  
28 contact study personnel.
- 29 • Phone contacts by study investigator are planned in the second week of washout periods to  
30 follow up on the patient and enquire to hyperglycaemic events or other adverse events.
- 31 • As soon as the final day (CMR with acipimox) of a washout visit (visit 1 or 3) is completed,  
32 antiglycaemic treatment according to study drug sequence is commenced to minimise time  
33 spent in hyperglycaemia.  
34  
35  
36  
37

38 In case of fasting BG > 13 mmol/L, the patient will be contacted daily for two additional days. If  
39 average fasting BG over the 3 days > 13 mmol/L that triggers an extra safety visit, where fasting  
40 plasma glucose (PG) is measured. If PG > 13 mmol/L on the day of the extra visit, then the patient  
41 is withdrawn from the study and antihyperglycaemic treatment is initiated.  
42  
43

### 44 Screening visit (V0)

45 Once oral and written informed consent is obtained by the study investigator, the screening  
46 procedure follows. Medical history is recorded, screening blood samples drawn, and an ECG,  
47 recording of blood pressure, pulse rate and registration of anthropometric data are performed, and  
48 patients are screened according to in- and exclusion criteria. A standard transthoracic  
49 echocardiography is performed, and VO<sub>2</sub>max is estimated (Box 3).  
50  
51  
52  
53  
54  
55

### 56 Study visits

57 All study visits consist of three study days – a metabolic study day and two CMR study days (Box  
58 4).  
59  
60

### The metabolic study day

The metabolic study is conducted at the Department of Endocrinology, Hvidovre Hospital, to document the metabolic effects of each study drug.

Participants meet in the morning after an overnight fast. Anthropometric data, blood pressure, pulse rate and an ECG are recorded, and two catheters, one in each arm are inserted for infusion of tracers and for repeated drawing of arterialised blood samples respectively. Baseline and safety blood samples are taken (Box 5), the participant empties bladder and the investigational drug (V2, V4) and the participants usual medications are administered at 0800h. Body composition is determined by Dual energy x-ray absorptiometry scan (DXA).

### Basal metabolism

Primed infusions of stable glucose ([6,6-D<sub>2</sub>]-glucose) and glycerol ([1,1,2,3,3-D<sub>5</sub>]-glycerol) tracers are initiated (T=-180 min). Blood is sampled at -30, -15 and -2 min to characterise glucose, lipid and amino acid metabolism. The patient empties bladder, urine is weighed, and samples are taken for determination of tracer concentrations and urinary nitrogen excretion, and the 5h-OGTT is initiated.

### 5h-OGTT

The patient ingests anhydrous glucose (72 g) with added [U-13C6]-glucose tracer (3 g) dissolved in 250 mL of water over 5 minutes (T=0 min). Intravenous tracer infusions continue unchanged. Blood is sampled regularly for 5 hours for characterisation of postprandial glucose, lipid and amino acid metabolism (Box 4 and 5). The patient empties bladder regularly during and at the end of the OGTT. Urine is sampled for nitrogen excretion and tracers/tracees.

Fat and muscle biopsies: Biopsies are obtained during the basal (T=-60 min) and the maximally insulin stimulated (T=60 min) state. Muscle biopsies are considered proxies for cardiomyocyte metabolic status. 30 min ventilated hood indirect calorimetry (Vyair Vyntus® CPX) is performed during the basal period (prior to biopsies) t= -90 min and postprandially at t=60 min for determination of fasting and postprandial energy expenditure and respiratory quotient.

### Exercise test (50% VO<sub>2</sub>max)

At T=300 min, the participant is exercised at 60 W for 4 minutes after which work load is increased until oxygen consumption is 50% of estimated VO<sub>2</sub>max. Pulse rate is recorded with a chest mounted pulse rate monitor and oxygen consumption with a mask mounted indirect calorimeter. Blood is sampled to characterise glucose, lipid and amino acid metabolism (Box 4 and 5). After 30 min, VO<sub>2</sub>max is estimated by increasing workload by 50W until a pulse rate increase of 30. When pulse is steady for 2 min, oxygen consumption and pulse rate are recorded, and the test is stopped. VO<sub>2</sub>max is estimated by linear extrapolation to the theoretical maximum pulse rate (220-age).

### *Ad libitum* meal test

SGLT2 inhibition is associated with a lower weight reduction than predicted from the urinary energy loss. SGLT2 inhibition does not change resting energy expenditure or blunt the thermogenic

1  
2  
3  
4 effect of feeding, suggesting that energy intake is increased [38]. Therefore, the metabolic study day  
5 is ended with an *ad libitum meal*, consisting of thoroughly mixed pasta bolognese (fixed nutrient  
6 composition and energy content). Patients are placed in a quiet corner and instructed to eat until  
7 full. Two glasses of water (total 300 mL) are allowed with the meal. The meal is weighed before  
8 and after serving and *ad libitum meal* intake defined as the difference. Throughout the day patients  
9 are asked to score their hunger, satiety and sensation of fullness on a visual analogue scale [51].  
10  
11  
12

### 13 Cardiac evaluation

14 Two CMR days are performed during each visit (V1-V4). In addition, diurnal blood pressure and  
15 Holter monitoring are performed. CMR is conducted at the Department of Cardiology,  
16 Rigshospitalet, Copenhagen, whereas Holter monitoring and diurnal blood pressure monitoring are  
17 performed at the Department of Cardiology, Hvidovre Hospital.  
18  
19

20 Participants meet fasting and morning medication, including investigational medicinal product (V2  
21 and V4), is administered. Anthropometric data are recorded, and two intravenous catheters are  
22 inserted into an antecubital and the contralateral dorsal hand vein for infusion of adenosine,  
23 gadolinium contrast and glycopyrrolate and for blood sampling respectively (Box 5). Prior to CMR  
24 a transthoracic echocardiography is performed (Box 3)  
25  
26  
27

28 CMR is performed on a 1.5 Tesla scanner (Siemens Aera; Siemens; Erlangen; Germany) with the  
29 patient lying supine on the back, using an 18-channel cardiac coil with continuous ECG gating.  
30  
31

32 Cine 2-, 3- and 4-chamber images, complete transverse and short axis cine stacks covering the  
33 whole heart are acquired. All images are obtained during end-expiratory breath-holds.

34 Myocardial perfusion images during rest and stress are obtained at the basal, mid-ventricular and  
35 apical cardiac short-axis level. Rest perfusion images of the myocardium is acquired using an  
36 intravenous bolus of gadolinium contrast (Gadovist®, Bayer AG, Germany) 0.075 mmol/kg  
37 bodyweight. The time of gadolinium contrast entry into the right and the left ventricle is accurately  
38 determined, and this transit time of gadovist multiplied by cardiac output is used to calculate the  
39 pulmonary and central (pulmonary + cardiac) blood volume.  
40  
41  
42  
43

44 Myocardial stress perfusion images are obtained with an i.v dose of 0.075 mmol/kg of gadovist  
45 during and 10 min after an intravenous adenosine (140 µg/min) administered for maximum 4  
46 minutes). This is followed by evaluation of cardiac function during chronotropic stress, where short  
47 axis cine stack will be reacquired 10 minutes after the administration of intravenous glycopyrrolate  
48 (4 µg/kg, max. 400µg, given as a bolus). This approach has been shown to unmasque subclinical  
49 diastolic dysfunction as has been demonstrated in normal healthy elderly [50].  
50  
51  
52  
53  
54  
55

### 56 Cardiac MRI, Acipimox

57 CMR scans will follow the same procedure as described above, but participants are instructed to  
58 ingest 250 mg acipimox p.o. twice, 4 hours before and right before the scan, to determine  
59  
60

1  
2  
3  
4 myocardial function. This repeated administration of acipimox is required for adequate suppression  
5 of hormone sensitive lipase activity and depletion of plasma FFAs (28). This has been shown to  
6 gradually impair cardiac function [52], and is done to disclose any coupling between FFA  
7 availability and cardiac function.  
8  
9

#### 10 CMR image analysis

11 Is performed using Circle42 (Circle Cardiovascular Imaging Inc., Calgary Canada, v5.5.1). LV  
12 volumes, LV mass, LV ejection fraction (LVEF) and LV peak filling rate are determined by tracing  
13 of the endo- and epicardial contours in end-diastolic and end-systolic phases. The papillary muscles  
14 are excluded from the myocardium. On native and post-contrast T1-mappings, endocardial and  
15 epicardial borders are traced, and the mean extra cellular volume (ECV) is calculated from areas  
16 outside late gadolinium enhancement (LGE) lesions. For determination of the ECV within an LGE  
17 lesion, myocardium without LGE in the segment is excluded. Myocardial perfusion scans are  
18 inspected for perfusion defects. Regions with infarctions, sub-endocardial perfusion defects or dark-  
19 rim artefacts will be excluded. Blinded to clinical data, the analyses will be reviewed and finalised  
20 by two CMR specialist.  
21  
22  
23  
24

#### 25 Diurnal blood pressure and Holter monitoring

26 Between study days during each visit, diurnal blood pressure is recorded (ScottCare, ABP 320,  
27 Cleveland, OH)) for 24 hours with 15 minutes intervals between 6.00 to 22.00- and 60-min  
28 intervals during night-time. Cardiac rhythm is evaluated with Holter monitoring (SCOTTCARE,  
29 CHROMA, model RZ153C, Cleveland, OH) for 48 hours.  
30  
31  
32

#### 33 Patient and public involvement

34 No patient involved.  
35  
36  
37

## 38 ANALYSES

#### 39 Blood and tissue samples

40 Subcutaneous fat- and muscle biopsies: Local analgesia is applied before sampling with a  
41 Bergströms cannula. Samples are immediately frozen in liquid nitrogen and stored at -80°C. Blood  
42 and urine samples: Samples are spun, aliquoted and stored at -20°C (GLP-1, PYY, Glucagon) or -  
43 80°C for later analysis. Bedside plasma glucose measurements are performed using the glucose  
44 oxidase technique (YSI model 2300 STAT Plus; YSI, Yellow Springs, OH). Home blood glucose  
45 measurements are carried out on Contour XT (Ascensia Diabetes Care Holdings AG, Basel,  
46 Switzerland). Safety blood- and urine samples are analysed on the same day at the Department of  
47 Clinical Biochemistry, Hvidovre Hospital.  
48  
49  
50  
51  
52

#### 53 Statistical methods

##### 54 Sample size calculation

55 Measures of myocardial function are highly reproducible when assessed using CMR, and interstudy  
56 and cohort coefficients of variation are in the range of 3-5% [53–55]  
57 Using the same CMR protocol as the present, Ahtarovski et al found a mean difference of 92 ml/s in  
58 Left Ventricular Peak Filling Rate between healthy young (585±62 ml/s) and healthy elderly  
59  
60



1  
2  
3  
4 subjects (493±55 ml/s) [55]. We assume that T2D patients have LVPFR corresponding to healthy  
5 elderly subjects, and we assume that empagliflozin treatment improves LVPFR by 30 ml/s  
6 ( $\Delta$ LVPFR=30 ml/s) from baseline and that insulin treatment does not improve LVPFR ( $\Delta$ LVPFR=0  
7 ml/s).  
8

9 Conservatively setting the standard deviation of between treatment differences of  $\Delta$ LVPFR at 30  
10 ml/s, a number of 20 patients would be adequate to determine a 30 ml/s difference between the two  
11 treatments with a power of 93% and a two-sided significance level of 0.01, when evaluating data  
12 with the paired student's t-test. In case of a 20% dropout rate, power would still be acceptable  
13 (83%,  $p=0.01$ ).  
14

#### 15 16 Statistical analysis plan

17 The primary and secondary endpoints are analysed assuming no period effect or treatment-period  
18 interaction. This assumption is reasonable, given results from similar studies, where no such  
19 interactions or effects have been reported [56]. Normally distributed data are presented using  
20 standard descriptive statistics, and reported as mean (SD) for normally distributed and median  
21 (Q1;Q3) for non-normally distributed data. Likewise, comparisons of normally distributed data is  
22 done using the paired Student's t-test for all completers, whereas Wilcoxon's paired signed rank test  
23 will be used if data is non-normally distributed.  
24

#### 25 26 Ethics and dissemination

27 The study is conducted according to ICH GCP guidelines E6 (R2) and registered with the Danish  
28 Medicines Agency (ref. id: 2017061587), The Capital Region Ethical Committee (H-17018846) and  
29 the Danish Data Protection Agency (2012-58-0004; AHH-2017-093, I-Suite nr.: 06012). Our  
30 results, regardless of outcome, will be published in relevant scientific journals. In addition, we will  
31 seek to disseminate results through presentations at scientific meetings. Publication will take place  
32 as soon as scientifically feasible. No later than 12 months after unregistering of the study, will  
33 results be made available at [www.clinicalregister.eu](http://www.clinicalregister.eu).  
34  
35  
36

#### 37 38 Timeframe

39 Screenings are performed from January 2018. Last patient, last visit is expected second half of 2021  
40 after which the study will be unregistered with the Danish Medicines Agency and the Capital  
41 Region Municipal Ethical Committee within 90 days. Data analyses are expected to be completed  
42 by Winter 2022.  
43  
44

#### 45 46 DISCUSSION

47 The profound and swift benefits of SGLT2i on cardiovascular risk in T2D have inspired the  
48 discussion of metabolism and its importance for cardiac function in patients with T2D [57–61].  
49 Especially since, SGLT2 inhibitors have metabolic effects that by and large are opposite to those of  
50 insulin treatment. Thus, insulin treatment is associated with increased tissue glucose uptake and  
51 utilisation, but suppression of lipid mobilisation and oxidation as well as lowering of plasma  
52 concentrations of ketone bodies [62]. SGLT2 inhibitors increase lipid mobilisation and oxidation,  
53 increase plasma ketone body concentrations and reduce tissue glucose uptake [38,63]. Both  
54 treatments lower plasma glucose, but insulin treatment increases whereas SGLT2i treatment  
55 decreases plasma insulin concentrations. Whether such changes in metabolism affect cardiac  
56 function, is still unsettled, but forcing cardiac glucose uptake and utilisation through insulin  
57  
58  
59  
60

1  
2  
3  
4 treatment has been suggested by some to benefit and by others to impair cardiac function [47,64–  
5 67], while yet others have suggested increased lipid and ketone body oxidation to be important for  
6 proper cardiac function in T2D [46,58,67]. Studies on SGLT2i treatments and the effects on cardiac  
7 function are beginning to emerge. In a recent study, 42 patients with T2D were randomised to 12  
8 weeks of empagliflozin 10 mg or placebo once daily. SGLT2 inhibition was shown to rapidly  
9 improve diastolic cardiac function as evaluated with echocardiography [68]. In a placebo controlled  
10 cross-over design, after 4 weeks of empagliflozin treatment in patients with T2D, myocardial  
11 glucose uptake was reduced and fatty acid oxidation unaltered, but this did not significantly change  
12 myocardial oxygen consumption or cardiac efficiency, nor any measure of cardiac function [69]. In  
13 a Swedish study, 6 weeks dapagliflozin treatment showed unchanged cardiac fatty acid uptake, a  
14 trend toward reduced left atrial maximal volume, and reduced LV oxygen consumption and external  
15 work compared to placebo [70], and in the only study found, where an active comparator was used,  
16 10 mg empagliflozin once daily for 12 weeks did not change cardiac lipid accumulation (as  
17 measured by MR spectrometry), cardiac function or cardiac metabolism compared to sitagliptin 50  
18 mg daily [71].

19  
20  
21  
22  
23 In conclusion, existing studies in humans have shown divergent results regarding changes in cardiac  
24 diastolic function with little changes in cardiac metabolism. However, most studies have compared  
25 cardiac effects of SGLT2i to placebo, thus not accounting for the circumstances that characterised  
26 the EMPA-REG trial, where anti glycaemic treatment was intensified in the placebo group  
27 concurrently [26]. Thus, the CVD risk benefits of the study may have arisen from unfavourable  
28 metabolic consequences of the treatment in the placebo arm. In the one study with an active  
29 comparator empagliflozin was compared to sitagliptin, which not only affects the incretin system  
30 but also has less specific metabolic effect [72]. Therefore, to date our study, is the one to most  
31 directly pursue the coupling between metabolism and cardiac function, by choosing insulin as the  
32 comparator, and by including the effects of acute lowering of free fatty acid concentrations in  
33 plasma on cardiac function.  
34  
35  
36  
37  
38

### 39 Disclosure summary

40 All authors have completed the ICMJE uniform disclosure form and declare: no support from any  
41 organisations for the submitted work; SM and NBJ have received research grants from Boehringer  
42 Ingelheim and JJH serves on advisory boards for Novo Nordisk, no other relationships or activities  
43 that could appear to have influenced the submitted work.  
44  
45  
46

### 47 Funding

48 The study is funded by an investigator-initiated study grant from Boehringer Ingelheim.  
49 Additional funding comes from Grosserer L. F. Foghts Fond, Charlottenlund, Denmark.  
50 Grant numbers not applicable.  
51  
52

### 53 Contributions

#### 54 Author contributions

55 Roopameera Thirumathyam (RT) will be conducting the study, collect all the data, perform data  
56 analyses and co-submit the study.  
57  
58  
59  
60



Erik A. Richter has contributed to the study design, designed the keton body- and biopsy analysis scheme and is going to perform these analyses.

Jens P. Goetze designed the pro-ANP and pro-BNP analysis scheme and is going to perform these analyses.

Mogens Fenger designed multiple metabolic analysis schemes (Triglycerides, insulin, free fatty acids, uric acid, urea and nitrogen) and is going to perform these analyses.

Gerrit van Hall designed the three-tracer measuring analysis schemes we are using in this study, and is going to perform these analyses.

Ulrik Dixen provided the study with analysis tools (holter-monitors and blood pressure monitors). He will perform the analyses of these data.

Jens Juul Holst participated in the protocol design, designed multiple metabolic analyses (GLP-1, glucagon and PYY) and will perform the analyses of these data.

Sten Madsbad co-planned the study and contributed with several analysing tools.

Niels Vejstrup co-designed the cardiac MRI guideline for the study and contributed with analysing tool (MRI scanner).

Per Lav Madsen co-planned the study, co-designed the cardiac MRI guideline for the study and will analyse the cardiac MRI data.

Nils Bruun Jørgensen co-planned the study, will perform all data analyses with RT and co-submit the study.

All of the above mentioned authors contributed with writing and revising this manuscript.

| Box 1: Eligibility criteria                                                                                                                                                                                                                                                                                                                                                                                                                                                                                                                                                                                         |
|---------------------------------------------------------------------------------------------------------------------------------------------------------------------------------------------------------------------------------------------------------------------------------------------------------------------------------------------------------------------------------------------------------------------------------------------------------------------------------------------------------------------------------------------------------------------------------------------------------------------|
| <b>Inclusion criteria</b>                                                                                                                                                                                                                                                                                                                                                                                                                                                                                                                                                                                           |
| Age $\geq 18$ years                                                                                                                                                                                                                                                                                                                                                                                                                                                                                                                                                                                                 |
| BMI $\geq 28$ kg/m <sup>2</sup>                                                                                                                                                                                                                                                                                                                                                                                                                                                                                                                                                                                     |
| HbA1c $\leq 9\%$ ( $\leq 10\%$ in diet or metformin treated only)                                                                                                                                                                                                                                                                                                                                                                                                                                                                                                                                                   |
| Fasting C-peptide $\geq 500$ pmol/L                                                                                                                                                                                                                                                                                                                                                                                                                                                                                                                                                                                 |
| Unchanged glycaemic treatment for 3 months prior to inclusion                                                                                                                                                                                                                                                                                                                                                                                                                                                                                                                                                       |
| High cardiovascular risk as one of the following:                                                                                                                                                                                                                                                                                                                                                                                                                                                                                                                                                                   |
| <ul style="list-style-type: none"> <li>• Previous myocardial infarction, stroke or peripheral arterial disease more than 2 months prior to informed consent</li> <li>• Evidence of multi-vessel coronary arterial disease (CAD) but without prior myocardial infarction, if more than 50% stenosis is present, if revascularised (CABG or PCI) more than 2 months prior or if 1 vessel is vascularised and the other with 50% stenosis.</li> <li>• Single vessel CAD without prior myocardial infarction if more than 50% stenosis is present, not revascularised and positive stress test for ischemia.</li> </ul> |
| <b>Exclusion criteria</b>                                                                                                                                                                                                                                                                                                                                                                                                                                                                                                                                                                                           |
| Insulin treatment within 3 months from informed consent                                                                                                                                                                                                                                                                                                                                                                                                                                                                                                                                                             |
| Type 1 diabetes                                                                                                                                                                                                                                                                                                                                                                                                                                                                                                                                                                                                     |
| Psychiatric disorder or mental retardation                                                                                                                                                                                                                                                                                                                                                                                                                                                                                                                                                                          |

1  
2  
3  
4 Drug or alcohol abuse within 3 months from informed consent  
5 Poor compliance  
6 Anaemia (Hb < 6.4 mmol/L) or other blood dyscrasias causing haemolysis or unstable  
7 erythrocytes.  
8 Indication of liver disease (ALT or Alkaline phosphatase elevation above 3x upper normal limit)  
9 Impaired renal function (eGFR < 45 ml/min/1.73 m<sup>2</sup>)  
10 Anti-obesity medication within 3 months from informed consent  
11 Systemic steroid treatment within 6 weeks from informed consent.  
12 Any uncontrolled endocrine disorder except T2D  
13 Bariatric surgery or other gastrointestinal conditions that may compromise gastrointestinal  
14 absorption  
15 Peptic ulcer – verified endoscopically  
16 Any form of surgery within 3 months of informed consent  
17 Acute myocardial infarction, stroke or peripheral arterial disease within 2 months of informed  
18 consent.  
19 Persistent or permanent atrial fibrillation  
20  
21 Inability to undergo experimental procedures including exclusion criteria for CMR scanning:  
22 Implantable cardioverter defibrillator/pacemaker  
23 Ferromagnetic clips  
24 Claustrophobia.  
25  
26 Contraindication to glycopyrrolate infusion:  
27 Known closed-angle glaucoma  
28 known severe prostate hyperplasia  
29 Tachycardia (HR > 100 at rest)  
30 Known bladder atony  
31 Cardia insufficiency or non-congenital pylorus stenosis –verified endoscopically  
32 Known gastroparesis  
33  
34 Contraindications to adenosine:  
35 2nd or 3rd degree atrioventricular block  
36 Severe hypotension (BP ≤ 90/50 mmHg)  
37 Long QT syndrome  
38 Unstable angina pectoris  
39 Decompensated heart failure  
40 Sinus node dysfunction  
41 Chronic obstructive pulmonary disease or asthma bronchiale (FEV1 ≤ 50% of expected)  
42  
43 Allergy towards any of the drugs or diagnostics used in the protocol (insulin, empagliflozin,  
44 acipimox, glycopyrrolate, adenosine, gadolinium contrast enhancer).  
45 Any condition which in the opinion of the investigator may jeopardize subject safety or  
46 compliance with the protocol.  
47  
48 Withdrawal criteria  
49  
50  
51  
52  
53  
54  
55  
56  
57  
58  
59  
60

Subjects may withdraw from the study without any notice or reason  
 Pregnancy discovered during the experiment  
 Unacceptable adverse reactions or reactions associated with the planned experiments, including severe glycaemic dysregulation during washout periods.

| Box 2: Endpoints              |                                                                                                                                                                                                                                                                                                                                                                                                                                                                                                                                                                                                                                                                                                                                                                                                                                            |
|-------------------------------|--------------------------------------------------------------------------------------------------------------------------------------------------------------------------------------------------------------------------------------------------------------------------------------------------------------------------------------------------------------------------------------------------------------------------------------------------------------------------------------------------------------------------------------------------------------------------------------------------------------------------------------------------------------------------------------------------------------------------------------------------------------------------------------------------------------------------------------------|
| Primary end point             | Change in left ventricular peak filling rate ( $\Delta$ LVPR)                                                                                                                                                                                                                                                                                                                                                                                                                                                                                                                                                                                                                                                                                                                                                                              |
| Secondary endpoints           | Change in left atrial passive emptying fraction ( $\Delta$ LAPEF)<br>Change in left ventricular ejection fraction ( $\Delta$ LVEF)                                                                                                                                                                                                                                                                                                                                                                                                                                                                                                                                                                                                                                                                                                         |
| Explorative endpoints include | <p>Cardiovascular:</p> <ul style="list-style-type: none"> <li>Change in VO<sub>2</sub>max and exercise tolerance test variables</li> <li>Change in central blood volume and haematocrite</li> <li>Change in heart rate variability</li> <li>Change in left ventricular volume</li> </ul> <p>Metabolic:</p> <ul style="list-style-type: none"> <li>Basal and postprandial AUC Free Fatty Acids and glycerol turnover</li> <li>Endogenous glucose production and tissue glucose disposal (metabolic clearance of glucose)</li> <li>Fasting and postprandial energy expenditure and respiratory quotient</li> <li>Glucagon-Insulin ratio</li> <li>Insulin sensitivity (AUC glucose metabolic clearance / AUC insulin concentration)</li> <li>Beta-cell function (prehepatic insulin secretion rate, correlated to ambient glucose)</li> </ul> |

| Box 3: Screening procedures |                                                                                                                                                                                                                        |
|-----------------------------|------------------------------------------------------------------------------------------------------------------------------------------------------------------------------------------------------------------------|
| Blood samples               | Haematology (haemoglobin, thrombocytes, haematocrit, leukocytes), liver and renal function tests (creatinine, eGFR (Cockcroft-Gault formula), alkaline phosphatases, alanine aminotransferases, lactate dehydrogenase, |

|                                   |                                                                                                                                                                                                                                                                                                                 |
|-----------------------------------|-----------------------------------------------------------------------------------------------------------------------------------------------------------------------------------------------------------------------------------------------------------------------------------------------------------------|
|                                   | bilirubin, amylase, sodium, potassium), fasting P-glucose, C-peptide, HbA1c, TSH, Urinary Albumin/creatinine mass ratio, and in fertile women, U-hCG.                                                                                                                                                           |
| Echocardiography                  | Parasternal long axis view, parasternal short axis view at aortic, mitral and apex levels, apical 4-chamber view, LVEF, E/E', E', LVEDV/BSA.                                                                                                                                                                    |
| Estimation of VO <sub>2</sub> max | Maximum oxygen uptake is estimated using Åström's two-point test performed on a cycle ergometer during indirect calorimetry. From measurements of VO <sub>2</sub> at two sub-maximal pulse rates VO <sub>2</sub> max is estimated by linear extrapolation to the theoretical maximal pulse rate (220-age) [73]. |

| Box 4: Visit overview                                                                                                                                                                                                                                                                                                                                                                                                                                                                                                                                                                                                               |                                                                                                                                                                                                                                                                                                                                                                                                            |                                                                                                                                                                                                                                            |
|-------------------------------------------------------------------------------------------------------------------------------------------------------------------------------------------------------------------------------------------------------------------------------------------------------------------------------------------------------------------------------------------------------------------------------------------------------------------------------------------------------------------------------------------------------------------------------------------------------------------------------------|------------------------------------------------------------------------------------------------------------------------------------------------------------------------------------------------------------------------------------------------------------------------------------------------------------------------------------------------------------------------------------------------------------|--------------------------------------------------------------------------------------------------------------------------------------------------------------------------------------------------------------------------------------------|
| Metabolic study day                                                                                                                                                                                                                                                                                                                                                                                                                                                                                                                                                                                                                 | Cardiac MR                                                                                                                                                                                                                                                                                                                                                                                                 | Cardiac MR, Acipimox                                                                                                                                                                                                                       |
| <ul style="list-style-type: none"> <li>- DXA-scan and fasting safety and efficacy blood samples</li> <li>- Determination of 3-hour basal metabolism.</li> <li>-- Infusion of glucose and glycerol tracers</li> <li>-- Basal muscle and fat biopsies</li> <li>-- Basal energy expenditure and determination of respiratory quotient</li> <li>- 5-hour OGTT</li> <li>-- with oral glucose tracer and -- continued intravenous glucose and glycerol tracer.</li> <li>-- Fat- and muscle biopsies at maximum insulin stimulation</li> <li>- Exercise test and determination of VO<sub>2</sub>max</li> <li>- Ad libitum meal.</li> </ul> | <ul style="list-style-type: none"> <li>- Fasting blood samples, before and after CMR.</li> <li>- Echocardiography</li> <li>- CMR Rest</li> <li>-- Without enhancement</li> <li>-- With enhancement and adenosine infusion</li> <li>- CMR Stress</li> <li>-- Unenhanced repeated during pharmacological chronotropic stress with glycopyrrolate infusion.</li> <li>- 24h ambulant blood pressure</li> </ul> | <ul style="list-style-type: none"> <li>Same protocol as Cardiac MR day, but during pharmacological suppression of hormone sensitive lipase activity and depletion of plasma free fatty acids.</li> <li>- 48h Holter monitoring.</li> </ul> |

1  
2  
3  
4  
5  
6  
7  
8  
9  
10  
11  
12  
13  
14  
15  
16  
17  
18  
19  
20  
21  
22  
23  
24  
25  
26  
27  
28  
29  
30  
31  
32  
33  
34  
35  
36  
37  
38  
39  
40  
41  
42  
43  
44  
45  
46  
47  
48  
49  
50  
51  
52  
53  
54  
55  
56  
57  
58  
59  
60

| Box 5: Blood samples on metabolic and CMR study days include |                                                                                                                                                                                                                                              |
|--------------------------------------------------------------|----------------------------------------------------------------------------------------------------------------------------------------------------------------------------------------------------------------------------------------------|
| Metabolic study day                                          | Blood samples: glucose, insulin, C-peptide, glucagon, FFAs, triglycerides, total amino acids and ketone bodies (betahydroxybuturate), tracers/tracees, gut hormones.<br>HbA1c, urate, blood urea nitrogen, cortisol, is sampled at baseline. |
| Cardiac MRI days                                             | Markers of cardiac function, including pro-ANP and pro-BNP, glucose, insulin, C-peptide, glucagon, FFAs, triglycerides, ketone bodies, haematocrit are drawn before and after CMR.                                                           |

### Figure legends

**Figure 1. Study outline.** Included patients undergo a 7-week program of washout of pre-existing antihyperglycemic treatment (except metformin) and run-in of empagliflozin. Hereafter they are randomised to treatment for  $5\pm 1$  weeks, followed by  $3\pm 1$  weeks wash-out and cross-over to  $5\pm 1$  weeks treatment with the remaining study drug. Tests performed at each visit are summarised in Box 4 and 5.

**Figure 2. Metabolic profile of the two study drugs.** Schematic representation of the metabolic changes expected with the two study drug treatments in a patient randomized to insulin first. Insulin treatment is characterized by low glucose, low FFAs and high insulin concentrations; empagliflozin treatment by low glucose, high FFAs and low insulin.

## References:

- 1 Defronzo RA. From the Triumvirate to the Ominous Octet : A New Paradigm for the Treatment of Type 2 Diabetes Mellitus. ;:773–95. doi:10.2337/db09-9028
- 2 De Vegt F, Dekker JM, Ruhé HG, *et al.* Hyperglycaemia is associated with all-cause and cardiovascular mortality in the Hoorn population: The Hoorn study. *Diabetologia* 1999;**42**:926–31. doi:10.1007/s001250051249
- 3 Pyorala M, Miettinen H, Laakso M, *et al.* Plasma insulin and all-cause, cardiovascular, and noncardiovascular mortality: the 22-year follow-up results of the Helsinki Policemen Study. *Diabetes Care* 2000;**23**:1097–102. doi:10.2337/diacare.23.8.1097
- 4 Lakka HM, Lakka TA, Tuomilehto J, *et al.* Hyperinsulinemia and the risk of cardiovascular death and acute coronary and cerebrovascular events in men: The Kuopio Ischaemic Heart Disease Risk Factor Study. *Arch Intern Med* 2000;**160**:1160–8. doi:10.1001/archinte.160.8.1160
- 5 Selvin E, Marinopoulos S, Berkenblit G, *et al.* Meta-analysis: Glycosylated hemoglobin and cardiovascular disease in diabetes mellitus. *Ann Intern Med* 2004;**141**. doi:10.7326/0003-4819-141-6-200409210-00007
- 6 Redfield MM, Jacobsen SJ, Burnett JC, *et al.* Burden of systolic and diastolic ventricular dysfunction in the community: appreciating the scope of the heart failure epidemic. *JAMA* 2003;**289**:194–202. doi:10.1001/JAMA.289.2.194
- 7 Boyer JK, Thanigaraj S, Schechtman KB, *et al.* Prevalence of ventricular diastolic dysfunction in asymptomatic, normotensive patients with diabetes mellitus. *Am J Cardiol* 2004;**93**:870–5. doi:10.1016/J.AMJCARD.2003.12.026
- 8 Jørgensen PG, Biering-Sørensen T, Mogelvang R, *et al.* Predictive value of echocardiography in Type 2 diabetes. *Eur Heart J Cardiovasc Imaging* 2019;**20**:687–93. doi:10.1093/ehjci/jej164
- 9 Tarquini R, Lazzeri C, Pala L, *et al.* The diabetic cardiomyopathy. *Acta Diabetol* 2011;**48**:173–81. doi:10.1007/s00592-010-0180-x
- 10 Komi S, Inoue Y, Hata H, *et al.* Cardiovascular magnetic resonance evaluation of left ventricular peak filling rate using steady-state free precession and phase contrast sequences. *Springerplus* 2016;**5**. doi:10.1186/s40064-016-2878-x
- 11 Diamant M, Lamb HJ, Groeneveld Y, *et al.* Diastolic dysfunction is associated with altered myocardial metabolism in asymptomatic normotensive patients with well-controlled type 2 diabetes mellitus. *J Am Coll Cardiol* 2003;**42**:328–35. doi:10.1016/S0735-1097(03)00625-9
- 12 Rosano G, Coats A. Modulation of Cardiac Metabolism in Heart Failure. *Int Cardiovasc Forum J* 2019;**17**:99–103. doi:10.17987/icfj.v17i0.597
- 13 Ungar I, Gilbert M, Siegel A, *et al.* Studies on myocardial metabolism. IV. Myocardial metabolism in diabetes. *Am J Med* 1955;**18**:385–96. doi:10.1016/0002-9343(55)90218-7
- 14 Rijzewijk LJ, van der Meer RW, Lamb HJ, *et al.* Altered myocardial substrate metabolism and decreased diastolic function in nonischemic human diabetic cardiomyopathy: studies with cardiac positron emission tomography and magnetic resonance imaging. *J Am Coll Cardiol* 2009;**54**:1524–32. doi:10.1016/j.jacc.2009.04.074
- 15 Stanley WC, Lopaschuk GD, Hall JL, *et al.* Regulation of myocardial carbohydrate metabolism under normal and ischaemic conditions. Potential for pharmacological interventions. *Cardiovasc Res* 1997;**33**:243–57. doi:10.1016/S0008-6363(96)00245-3
- 16 Mehta SR, Yusuf S, Díaz R, *et al.* Effect of glucose-insulin-potassium infusion on mortality in patients with acute ST-segment elevation myocardial infarction: The CREATE-ECLA randomized controlled trial. *J Am Med Assoc* 2005;**293**:437–46. doi:10.1001/jama.293.4.437
- 17 Malmberg K, Rydén L, Wedel H, *et al.* FASTTRACK intense metabolic control by means of insulin in patients with diabetes mellitus and acute myocardial infarction (DIGAMI 2): Effects on mortality and morbidity. *Eur Heart J* 2005;**26**:650–61. doi:10.1093/eurheartj/ehi199
- 18 Malmberg K, Rydén L, Efendic S, *et al.* Randomized trial of insulin-glucose infusion followed by subcutaneous insulin treatment in diabetic patients with acute myocardial infarction (DIGAMI study): Effects on mortality at 1 year. *J Am Coll Cardiol* 1995;**26**:57–



65. doi:10.1016/0735-1097(95)00126-K
- 19 NICE-SUGAR Study Investigators, Finfer S, Chittock DR, *et al.* Intensive versus conventional glucose control in critically ill patients. *N Engl J Med* 2009;**360**:1283–97. doi:10.1056/NEJMoa0810625
- 20 Hemmingsen B, Lund SS, Gluud C, *et al.* Intensive glycaemic control for patients with type 2 diabetes: systematic review with meta-analysis and trial sequential analysis of randomised clinical trials. *BMJ* 2011;**343**:d6898. <http://www.pubmedcentral.nih.gov/articlerender.fcgi?artid=3223424&tool=pmcentrez&rendertype=abstract> (accessed 9 Sep 2015).
- 21 Duckworth W, Abraira C, Moritz T, *et al.* Glucose control and vascular complications in veterans with type 2 diabetes. *N Engl J Med* 2009;**360**:129–39. doi:10.1056/NEJMoa0808431
- 22 ADVANCE Collaborative Group, Patel A, MacMahon S, *et al.* Intensive blood glucose control and vascular outcomes in patients with type 2 diabetes. *N Engl J Med* 2008;**358**:2560–72. doi:10.1056/NEJMoa0802987
- 23 Basal Insulin and Cardiovascular and Other Outcomes in Dysglycemia. *N Engl J Med* 2012;**367**:319–28. doi:10.1056/nejmoa1203858
- 24 Action to Control Cardiovascular Risk in Diabetes Study Group, Gerstein HC, Miller ME, *et al.* Effects of intensive glucose lowering in type 2 diabetes. *N Engl J Med* 2008;**358**:2545–59. doi:10.1056/NEJMoa0802743
- 25 Sciences HH, Miller ME, Byington RP, *et al.* Effects of Intensive Glucose Lowering in Type 2 Diabetes. *N Engl J Med* 2008;**358**:2545–59. doi:10.1056/nejmoa0802743
- 26 Zinman B, Wanner C, Lachin JM, *et al.* Empagliflozin, Cardiovascular Outcomes, and Mortality in Type 2 Diabetes. *N Engl J Med* 2015;**373**:2117–28. doi:10.1056/NEJMoa1504720
- 27 McMurray JJV, Solomon SD, Inzucchi SE, *et al.* Dapagliflozin in Patients with Heart Failure and Reduced Ejection Fraction. *N Engl J Med* 2019;**381**:1995–2008. doi:10.1056/nejmoa1911303
- 28 Zou CY, Liu XK, Sang YQ, *et al.* Effects of SGLT2 inhibitors on cardiovascular outcomes and mortality in type 2 diabetes: A meta-analysis. *Med (United States)* 2019;**98**. doi:10.1097/MD.00000000000018245
- 29 Ferrannini E, Muscelli E, Frascerra S, *et al.* Metabolic response to sodium-glucose cotransporter 2 inhibition in type 2 diabetic patients. *J Clin Invest* 2014;**124**:499–508. doi:10.1172/JCI72227
- 30 Merovci A, Solis-Herrera C, Daniele G, *et al.* Dapagliflozin improves muscle insulin sensitivity but enhances endogenous glucose production. *J Clin Invest* 2014;**124**:509–14. doi:10.1172/JCI70704
- 31 Ferrannini E, Baldi S, Frascerra S, *et al.* Renal Handling of Ketones in Response to Sodium – Glucose Cotransporter 2 Inhibition in Patients With Type 2 Diabetes. 2017;**40**:771–6. doi:10.2337/dc16-2724
- 32 Chilton R, Tikkanen I, Cannon CP, *et al.* Effects of empagliflozin on blood pressure and markers of arterial stiffness and vascular resistance in patients with type 2 diabetes. *Diabetes Obes Metab* 2015;**17**:1180–93. doi:10.1111/dom.12572
- 33 Trum M, Riechel J, Lebek S, *et al.* Empagliflozin inhibits Na<sup>+</sup>/H<sup>+</sup> exchanger activity in human atrial cardiomyocytes. 2020;**44**:29–37. doi:10.1002/ehf2.13024
- 34 Baartscheer A, Schumacher CA, Wüst RCI, *et al.* Empagliflozin decreases myocardial cytoplasmic Na<sup>+</sup> through inhibition of the cardiac Na<sup>+</sup>/H<sup>+</sup> exchanger in rats and rabbits. 2017;**568**–73. doi:10.1007/s00125-016-4134-x
- 35 Garvey WT, Gaal L Van, Leiter LA, *et al.* Effects of canagliflozin versus glimepiride on adipokines and inflammatory biomarkers in type 2 diabetes ☆. 2018;**85**:32–7. doi:10.1016/j.metabol.2018.02.002
- 36 Heerspink HJL, Perco P, Mulder S, *et al.* Canagliflozin reduces inflammation and fibrosis biomarkers : a potential mechanism of action for beneficial effects of SGLT2 inhibitors in diabetic kidney disease. 2019;**1154**–66.
- 37 Lauritsen KM, Nielsen BRR, Tolbod LP, *et al.* SGLT2 Inhibition Does Not Affect

1  
2  
3  
4  
5  
6  
7  
8  
9  
10  
11  
12  
13  
14  
15  
16  
17  
18  
19  
20  
21  
22  
23  
24  
25  
26  
27  
28  
29  
30  
31  
32  
33  
34  
35  
36  
37  
38  
39  
40  
41  
42  
43  
44  
45  
46  
47  
48  
49  
50  
51  
52  
53  
54  
55  
56  
57  
58  
59  
60

- Myocardial Fatty Acid Oxidation or Uptake, But Reduces Myocardial Glucose Uptake and Blood Flow in Individuals With Type 2 Diabetes— a Randomized Double-Blind, Placebo-Controlled Crossover Trial. *Diabetes* 2020;:db200921. doi:10.2337/db20-0921
- 38 Ferrannini E, Muscelli E, Frascerra S, *et al.* Metabolic response to sodium-glucose cotransporter 2 inhibition in type 2 diabetic patients. *J Clin Invest* 2014;**124**:499–508. doi:10.1172/JCI72227
- 39 Jørgensen NB, Pedersen J, Vaag AA. EMPA-REG: Glucose excretion and lipid mobilization – not storage – saves lives. *J Diabetes Complications* 2016;**30**:753. doi:10.1016/j.jdiacomp.2016.02.015
- 40 Ekanayake P, Hupfeld C, Mudaliar S. Sodium-Glucose Cotransporter Type 2 (SGLT-2) Inhibitors and Ketogenesis: the Good and the Bad. *Curr Diab Rep* 2020;**20**. doi:10.1007/s11892-020-01359-z
- 41 Ferrannini E, Mark M, Mayoux E. CV protection in the EMPA-REG OUTCOME trial: A thrifty substrate hypothesis. *Diabetes Care* 2016;**39**:1108–14. doi:10.2337/dc16-0330
- 42 Nielsen R, Møller N, Gormsen LC, *et al.* Cardiovascular Effects of Treatment With the Ketone Body 3-Hydroxybutyrate in Chronic Heart Failure Patients. *Circulation* 2019;**139**:2129–41. doi:10.1161/CIRCULATIONAHA.118.036459
- 43 Santos-Gallego CG, Requena-Ibanez JA, San Antonio R, *et al.* Empagliflozin Ameliorates Adverse Left Ventricular Remodeling in Nondiabetic Heart Failure by Enhancing Myocardial Energetics. *J Am Coll Cardiol* 2019;**73**:1931–44. doi:10.1016/j.jacc.2019.01.056
- 44 Wolf P, Winhofer Y, Krssak M, *et al.* Suppression of plasma free fatty acids reduces myocardial lipid content and systolic function in type 2 diabetes. *Nutr Metab Cardiovasc Dis* 2016;**26**:387–92. doi:10.1016/j.numecd.2016.03.012
- 45 Tuunanen H, Engblom E, Naum A, *et al.* Free fatty acid depletion acutely decreases cardiac work and efficiency in cardiomyopathic heart failure. *Circulation* 2006;**114**:2130–7. doi:10.1161/CIRCULATIONAHA.106.645184
- 46 Harmancey R, Vasquez HG, Guthrie PH, *et al.* Decreased long-chain fatty acid oxidation impairs postischemic recovery of the insulin-resistant rat heart. *FASEB J* 2013;**27**:3966–78. doi:10.1096/fj.13-234914
- 47 Harmancey R, Lam TN, Lubrano GM, *et al.* Insulin resistance improves metabolic and contractile efficiency in stressed rat heart. *FASEB J* 2012;**26**:3118–26. doi:10.1096/fj.12-208991
- 48 Zinman B, Inzucchi SE, Lachin JM, *et al.* Rationale, design, and baseline characteristics of a randomized, placebo-controlled cardiovascular outcome trial of empagliflozin (EMPA-REG OUTCOME™). *Cardiovasc Diabetol* 2014;**13**:102. doi:10.1186/1475-2840-13-102
- 49 Li N, Zhou H. SGLT2 Inhibitors: A Novel Player in the Treatment and Prevention of Diabetic Cardiomyopathy. *Drug Des Devel Ther* 2020;**Volume 14**:4775–88. doi:10.2147/DDDT.S269514
- 50 Ahtarovski K a, Iversen KK, Lønborg JT, *et al.* Left atrial and ventricular function during dobutamine and glycopyrrolate stress in healthy young and elderly as evaluated by cardiac magnetic resonance. *Am J Physiol Heart Circ Physiol* 2012;**303**:H1469-73. doi:10.1152/ajpheart.00365.2012
- 51 Flint a, Raben a, Blundell JE, *et al.* Reproducibility, power and validity of visual analogue scales in assessment of appetite sensations in single test meal studies. *Int J Obes Relat Metab Disord* 2000;**24**:38–48. <http://www.ncbi.nlm.nih.gov/pubmed/10702749>
- 52 Wolf P, Winhofer Y, Krssak M, *et al.* Suppression of plasma free fatty acids reduces myocardial lipid content and systolic function in type 2 diabetes. *Nutr Metab Cardiovasc Dis* 2016;**26**:387–92. doi:10.1016/j.numecd.2016.03.012
- 53 Grothues F, Smith GC, Moon JCC, *et al.* Comparison of interstudy reproducibility of cardiovascular magnetic resonance with two-dimensional echocardiography in normal subjects and in patients with heart failure or left ventricular hypertrophy. *Am J Cardiol* 2002;**90**:29–34. doi:10.1016/S0002-9149(02)02381-0
- 54 Morton G, Jogiya R, Plein S, *et al.* Quantitative cardiovascular magnetic resonance perfusion imaging: Inter-study reproducibility. *Eur Heart J Cardiovasc Imaging* 2012;**13**:954–60. doi:10.1093/ehjci/jes103

- 1  
2  
3  
4 55 Ahtarovski KA, Iversen KK, Lønborg JT, *et al.* Left atrial and ventricular function during  
5 dobutamine and glycopyrrolate stress in healthy young and elderly as evaluated by cardiac  
6 magnetic resonance. *Am J Physiol - Hear Circ Physiol* 2012;**303**:1469–73.  
7 doi:10.1152/ajpheart.00365.2012
- 8 56 Kumarathurai P, Anholm C, Larsen BS, *et al.* Effects of liraglutide on heart rate and heart  
9 rate variability: A randomized, double-blind, placebo-controlled crossover study. *Diabetes*  
10 *Care* 2017;**40**:117–24. doi:10.2337/dc16-1580
- 11 57 Ferrannini E, Mark M, Mayoux E. CV Protection in the EMPA-REG OUTCOME Trial: A  
12 “Thrifty Substrate” Hypothesis. *Diabetes Care* 2016;**39**:1108–14.  
13 doi:10.2337/dc16-0330
- 14 58 Jørgensen NB, Pedersen J, Vaag AA. EMPA-REG: Glucose excretion and lipid mobilization  
15 - not storage - saves lives. *J Diabetes Complications* 2016;**30**:753.  
16 doi:10.1016/j.jdiacomp.2016.02.015
- 17 59 The Lancet Diabetes Endocrinology. Getting to the heart of the matter in type 2 diabetes.  
18 *lancet Diabetes Endocrinol* 2015;**3**:827. doi:10.1016/S2213-8587(15)00384-8
- 19 60 DeFronzo RA. The EMPA-REG study: What has it told us? A diabetologist’s perspective. *J*  
20 *Diabetes Complications* 2016;**30**:1–2. doi:10.1016/j.jdiacomp.2015.10.013
- 21 61 Nirengi S, Peres Valgas da Silva C, Stanford KI. Disruption of energy utilization in diabetic  
22 cardiomyopathy; a mini review. *Curr. Opin. Pharmacol.* 2020;**54**:82–90.  
23 doi:10.1016/j.coph.2020.08.015
- 24 62 DeFronzo RA. Banting Lecture. From the triumvirate to the ominous octet: a new paradigm  
25 for the treatment of type 2 diabetes mellitus. *Diabetes* 2009;**58**:773–95. doi:10.2337/db09-  
26 9028
- 27 63 Merovci A, Solis-Herrera C, Daniele G, *et al.* Dapagliflozin improves muscle insulin  
28 sensitivity but enhances endogenous glucose production. *J Clin Invest* 2014;**124**:509–14.  
29 doi:10.1172/JCI70704
- 30 64 Stanley WC, Lopaschuk GD, McCormack JG. Regulation of energy substrate metabolism in  
31 the diabetic heart. *Cardiovasc Res* 1997;**34**:25–  
32 33.<http://www.ncbi.nlm.nih.gov/pubmed/9217869> (accessed 3 Feb 2016).
- 33 65 Nolan CJ, Ruderman NB, Kahn SE, *et al.* Insulin resistance as a physiological defense  
34 against metabolic stress: implications for the management of subsets of type 2 diabetes.  
35 *Diabetes* 2015;**64**:673–86. doi:10.2337/db14-0694
- 36 66 Taegtmeier H, Beuloye C, Harmancey R, *et al.* Comment on Nolan et al. Insulin Resistance  
37 as a Physiological Defense Against Metabolic Stress: Implications for the Management of  
38 Subsets of Type 2 Diabetes. *Diabetes* 2015;**64**:673–686. *Diabetes* 2015;**64**:e37.  
39 doi:10.2337/db15-0655
- 40 67 Taegtmeier H, Beuloye C, Harmancey R, *et al.* Insulin resistance protects the heart from  
41 fuel overload in dysregulated metabolic states. *Am J Physiol Heart Circ Physiol*  
42 2013;**305**:H1693-7. doi:10.1152/ajpheart.00854.2012
- 43 68 Rau M, Thiele K, Hartmann NUK, *et al.* Empagliflozin does not change cardiac index nor  
44 systemic vascular resistance but rapidly improves left ventricular filling pressure in patients  
45 with type 2 diabetes: a randomized controlled study. *Cardiovasc Diabetol* 2021;**20**.  
46 doi:10.1186/s12933-020-01175-5
- 47 69 Lauritsen KM, Nielsen BRR, Tolbod LP, *et al.* SGLT2 Inhibition Does Not Affect  
48 Myocardial Fatty Acid Oxidation or Uptake, But Reduces Myocardial Glucose Uptake and  
49 Blood Flow in Individuals With Type 2 Diabetes– a Randomized Double-Blind, Placebo-  
50 Controlled Crossover Trial. *Diabetes* 2020;**70**:db200921. doi:10.2337/db20-0921
- 51 70 Oldgren J, Laurila S, Åkerblom A, *et al.* Effects of 6 weeks treatment with dapagliflozin, a  
52 sodium-glucose co-transporter 2 inhibitor, on myocardial function and metabolism in patients  
53 with type 2 diabetes: a randomized placebo-controlled exploratory study. *Diabetes, Obes*  
54 *Metab* 2021;:dom.14363. doi:10.1111/dom.14363
- 55 71 Hiruma S, Shigiyama F, Hisatake S, *et al.* A prospective randomized study comparing effects  
56 of empagliflozin to sitagliptin on cardiac fat accumulation, cardiac function, and cardiac  
57 metabolism in patients with early-stage type 2 diabetes: the ASSET study. *Cardiovasc*  
58 *Diabetol* 2021;**20**. doi:10.1186/s12933-021-01228-3
- 59  
60

1  
2  
3  
4  
5  
6  
7  
8  
9  
10  
11  
12  
13  
14  
15  
16  
17  
18  
19  
20  
21  
22  
23  
24  
25  
26  
27  
28  
29  
30  
31  
32  
33  
34  
35  
36  
37  
38  
39  
40  
41  
42  
43  
44  
45  
46  
47  
48  
49  
50  
51  
52  
53  
54  
55  
56  
57  
58  
59  
60

- 72 Deacon CF. A review of dipeptidyl peptidase-4 inhibitors. Hot topics from randomized controlled trials. *Diabetes, Obes. Metab.* 2018;**20**:34–46. doi:10.1111/dom.13135
- 73 Nordsborg N, Timmerman M. *Testmanual - patientinterview og konditionstest. 2.0.* København: : Sundhedsstyrelsen 2006.

For peer review only

Study outline

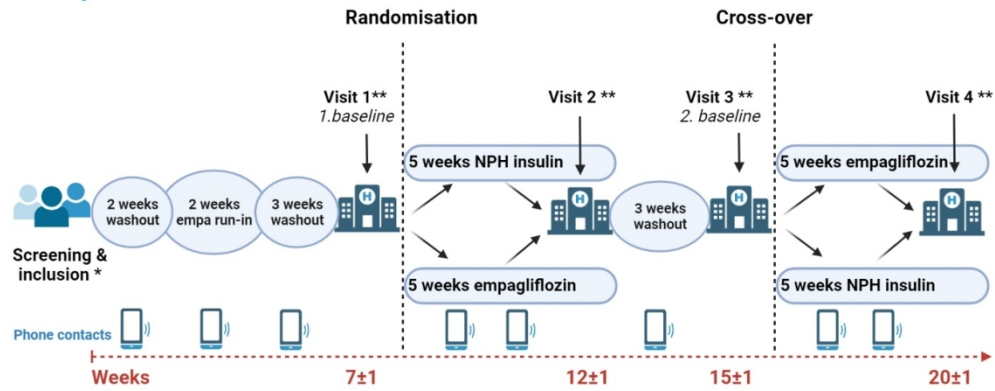

\* See text box 3 for screening procedure

\*\* See text box 4 & 5 for visit overview

Figure 1. Study outline. Included patients undergo a 7-week program of washout of pre-existing antiglycemic treatment (except metformin) and run-in of empagliflozin. Hereafter they are randomised to treatment for 5±1 weeks, followed by 3±1 weeks wash-out and cross-over to 5±1 weeks treatment with the remaining study drug. Tests performed at each visit are summarised in Box 4 and 5.

369x187mm (96 x 96 DPI)

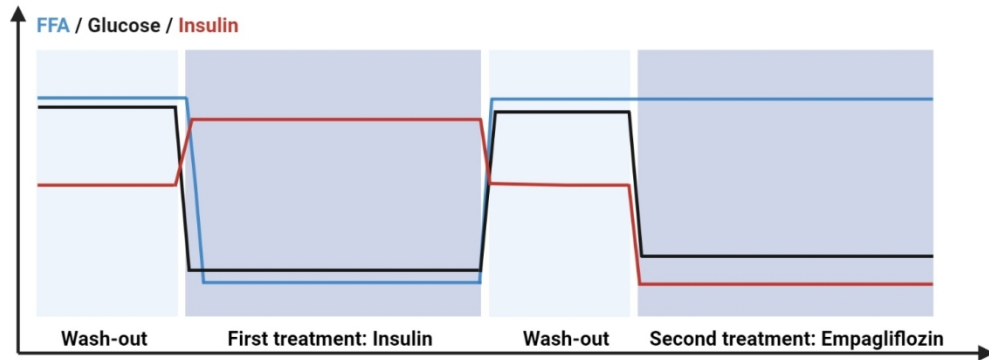

Figure 2. Metabolic profile of the two study drugs. Schematic representation of the metabolic changes expected with the two study drug treatments in a patient randomized to insulin first. Insulin treatment is characterized by low glucose, low FFAs and high insulin concentrations; empagliflozin treatment by low glucose, high FFAs and low insulin.

396x151mm (96 x 96 DPI)



# BMJ Open

**Investigating the roles of hyperglycemia, hyperinsulinemia, and elevated free fatty acids in cardiac function in patients with type 2 diabetes via treatment with insulin compared with empagliflozin: protocol for the HyperCarD2 randomised, crossover trial**

|                                 |                                                                                                                                                                                                                                                                                                                                                                                                                                                                                                                                                                                                                                                                                                                                                                                                                                                                                                                                                                                                                                                                                                                      |
|---------------------------------|----------------------------------------------------------------------------------------------------------------------------------------------------------------------------------------------------------------------------------------------------------------------------------------------------------------------------------------------------------------------------------------------------------------------------------------------------------------------------------------------------------------------------------------------------------------------------------------------------------------------------------------------------------------------------------------------------------------------------------------------------------------------------------------------------------------------------------------------------------------------------------------------------------------------------------------------------------------------------------------------------------------------------------------------------------------------------------------------------------------------|
| Journal:                        | <i>BMJ Open</i>                                                                                                                                                                                                                                                                                                                                                                                                                                                                                                                                                                                                                                                                                                                                                                                                                                                                                                                                                                                                                                                                                                      |
| Manuscript ID                   | bmjopen-2021-054100.R2                                                                                                                                                                                                                                                                                                                                                                                                                                                                                                                                                                                                                                                                                                                                                                                                                                                                                                                                                                                                                                                                                               |
| Article Type:                   | Protocol                                                                                                                                                                                                                                                                                                                                                                                                                                                                                                                                                                                                                                                                                                                                                                                                                                                                                                                                                                                                                                                                                                             |
| Date Submitted by the Author:   | 27-Jun-2022                                                                                                                                                                                                                                                                                                                                                                                                                                                                                                                                                                                                                                                                                                                                                                                                                                                                                                                                                                                                                                                                                                          |
| Complete List of Authors:       | Thirumathyam, Roopameera; Hvidovre Hospital, Department of Endocrinology<br>Richter, Erik; University of Copenhagen, Department of Nutrition, Exercise and Sports, Section of Molecular Physiology, Faculty of Science<br>Goetze, Jens; University of Copenhagen, Department of Clinical Biochemistry, Rigshospitalet<br>Fenger, Mogens; Hvidovre Hospital, Department of Clinical Biochemistry<br>Van Hall, Gerrit; Rigshospitalet, Clinical Metabolomics Core Facility, Clinical Biochemistr; University of Copenhagen, Department of Biomedical Sciences, Faculty of Health Sciences<br>Dixen, Ulrik; Hvidovre University Hospital, Department of cardiology<br>Holst, Jens; University of Copenhagen, NovoNordisk Center for Basic Metabolic Research; University of Copenhagen, Department of Biomedical Sciences, Faculty of Health Sciences<br>Madsbad, Sten; Hvidovre Hospital, Department of Endocrinology<br>Vejlstrup, Niels; Rigshospitalet, Department of Cardiology<br>Madsen, Per; Herlev Hospital, Department of Cardiology<br>Jørgensen, Nils Bruun; Hvidovre Hospital, Department of Endocrinology |
| <b>Primary Subject Heading</b>: | Cardiovascular medicine                                                                                                                                                                                                                                                                                                                                                                                                                                                                                                                                                                                                                                                                                                                                                                                                                                                                                                                                                                                                                                                                                              |
| Secondary Subject Heading:      | Diabetes and endocrinology                                                                                                                                                                                                                                                                                                                                                                                                                                                                                                                                                                                                                                                                                                                                                                                                                                                                                                                                                                                                                                                                                           |
| Keywords:                       | Coronary heart disease < CARDIOLOGY, Ischaemic heart disease < CARDIOLOGY, Myocardial infarction < CARDIOLOGY, Diabetic nephropathy & vascular disease < DIABETES & ENDOCRINOLOGY, DIABETES & ENDOCRINOLOGY                                                                                                                                                                                                                                                                                                                                                                                                                                                                                                                                                                                                                                                                                                                                                                                                                                                                                                          |
|                                 |                                                                                                                                                                                                                                                                                                                                                                                                                                                                                                                                                                                                                                                                                                                                                                                                                                                                                                                                                                                                                                                                                                                      |

SCHOLARONE™  
Manuscripts

**TITLE**

“Investigating the roles of hyperglycemia, hyperinsulinemia, and elevated free fatty acids in cardiac function in patients with type 2 diabetes via treatment with insulin compared with empagliflozin: protocol for the HyperCarD2 randomised, crossover trial”

Short title: The HyperCarD2 study

**AUTHORS:**

Roopameera Thirumathyam<sup>1</sup>, Erik A. Richter<sup>2</sup>, Jens P. Goetze<sup>3</sup>, Mogens Fenger<sup>4</sup>, Gerrit van Hall<sup>5,8</sup>, Ulrik Dixen<sup>6</sup>, Jens Juul Holst<sup>7,8</sup>, Sten Madsbad<sup>1</sup>, Niels Vejlstrup<sup>9</sup>, Per Lav Madsen<sup>10</sup>, Nils Bruun Jørgensen<sup>1</sup>

**AUTHOR AFILIATIONS:**

1. Department of Endocrinology, Hvidovre Hospital, Hvidovre, Denmark
2. Department of Nutrition, Exercise and Sports, Section of Molecular Physiology, Faculty of Science, Copenhagen, Denmark.
3. Department of Clinical Biochemistry, Rigshospitalet, University of Copenhagen, Denmark.
4. Department of Clinical Biochemistry, Hvidovre Hospital, Denmark
5. Clinical Metabolomics Core Facility, Clinical Biochemistry, Rigshospitalet, Denmark
6. Department of Cardiology. Hvidovre Hospital, Denmark
7. Novo Nordisk Center for Basic Metabolic Research
8. Department of Biomedical Sciences, Faculty of Health Sciences, University of Copenhagen, Denmark
9. Department of Cardiology, Rigshospitalet, Copenhagen, Denmark
10. Department of Cardiology, Herlev Hospital, Herlev, Denmark

**CORRESPONDING AUTHOR:** Nils Bruun Jørgensen – email: [nilsbuun.joergensen@regionh.dk](mailto:nilsbuun.joergensen@regionh.dk)

**PRIMARY SPONSOR:** Sten Madsbad – email: [sten.madsbad@regionh.dk](mailto:sten.madsbad@regionh.dk)

**WORD COUNT:** Max 4000 words

## ABSTRACT

Introduction: Type 2 diabetes (T2D) is characterised by elevated plasma glucose, free fatty acid (FFA) and insulin concentrations, and this metabolic profile is linked to diabetic cardiomyopathy, a diastolic dysfunction at first, and increased cardiovascular disease (CVD) risk. Shifting cardiac metabolism towards glucose utilisation has been suggested to improve cardiovascular function and CVD risk, but insulin treatment increases overall glucose oxidation and lowers lipid oxidation, without reducing CVD risk, whereas SGLT-2 inhibitors (SGLT-2i) increase FFA, ketone body concentrations and lipid oxidation while decreasing insulin concentrations and CVD risk. The aim of the present study is to elucidate the importance of different metabolic profiles obtained during treatment with a SGLT2i versus insulin for myocardial function in patients with T2D.

Methods and analyses: Randomised, cross-over study, where 20 patients with T2D and BMI >28 kg/m<sup>2</sup> receive 25 mg empagliflozin qd or NPH insulin bid first for 5 weeks followed by a 3-week washout before crossing over to the remaining treatment. Insulin treatment is titrated to achieve similar glycaemic control as with empagliflozin. In those randomised to insulin first, glycaemia during an initial empagliflozin run-in period prior to randomisation serves as target glucose. Metabolic and cardiac evaluation is performed before and at the end of each treatment period. The primary endpoint is change (treatment – washout) in left ventricular peak filling rate, as assessed by cardiac MR (CMR) with and without acute lowering of plasma FFAs with acipimox. Secondary and explorative endpoints are changes in left atrial passive emptying fraction, left ventricular ejection fraction, central blood volume and metabolic parameters.

Ethics and dissemination: This study is approved by the Danish Medicines Agency (ref. nr.: 2017061587), the Danish Data Protection Agency (ref. nr.: AHH-2017-093) and the Capital Region Ethics Committee (ref. nr.: H-17018846). The trial will be conducted in accordance with ICH-GCP guidelines and the Helsinki Declaration and all participants will provide oral and written informed consent (see supplementary appendix 1). Our results, regardless of outcome, will be published in relevant scientific journals and we also will seek to disseminate results through presentations at scientific meetings.

Trial registration number: EudraCT: 2017-002101.

## STRENGTHS AND LIMITATIONS

- Comparison with NPH Insulin, which has opposite metabolic effects to empagliflozin, provides a strong basis for detecting metabolic effects on cardiac function.
- Repeated cardiac MR, during depletion of plasma FFAs with acipimox during treatments and washouts allows for dissection of the individual roles of hyperglycaemia, hyperinsulinemia and elevated free fatty acids on cardiac function in T2D.
- A cross-over design is vulnerable to dropout, but provides greater statistical power

- Effects of metabolic changes on cardiac function are limited to the 5-week intervention period, which excludes effects arising from longer-term treatment.

## INTRODUCTION

Type 2 diabetes (T2D) is characterised by hyperglycaemia, hyperinsulinemia, increased free fatty acids and impaired tissue glucose uptake and oxidation [1]. T2D is associated with an increased cardiovascular morbidity, and the more dysregulated the metabolic state, the greater the cardiovascular risk [2–5]. T2D develops when insulin secretion can no longer compensate for the ambient insulin resistance, and therefore previous treatments has focused on increasing insulin signalling by either exogenous insulin administration, stimulation of endogenous insulin secretion or enhancing insulin sensitivity [1].

Diabetic cardiomyopathy (DCM), is an early “silent” complication to T2D, independent of hypertension and/or coronary heart disease. It is characterised by left ventricular (LV) hypertrophy and diastolic dysfunction [6,7] and has been linked to the increased cardiovascular risk in T2D [8]. DCM may be accurately described by measuring left ventricular peak filling rate (LVPFR) and left ventricular ejection fraction (LVEF) using cardiac magnetic resonance imaging (CMR) [9,10]. Both diastole and systole are energy requiring processes and sensitive to changes in energy availability [11,12]. Interestingly, cardiac metabolism in patients with T2D is altered and depends more on lipid oxidation and less on glucose oxidation compared to non-diabetic controls [13,14]. It has been argued that glucose oxidation is a better source of energy for the heart than lipid oxidation, especially during stress such as myocardial ischemia, because this yields more ATP pr. unit oxygen [15]. However, manipulating cardiac metabolism towards glucose oxidation, by administering glucose-insulin (-potassium) infusions in patients with hyperglycaemia and myocardial infarction has been attempted, but did not improve survival in neither diabetic nor non-diabetic patients [16–18]. In intensive care unit patients, strict glycaemic control using insulin has been associated with increased mortality [19], and in patients with T2D and increased CVD risk, intensive glycaemic control has not reduced CVD risk compared to conventional glycaemic control [20–23] and in the ACCORD study, which involved aggressive insulin treatment resulted in excess mortality [24]. Thus, insulin treatment does not prevent cardiovascular events in patients with T2D nor improve prognosis when such occur [25].

SGLT2-inhibition (SGLT2i), on the other hand, is a newer treatment principle in T2D, which has proven effective in attenuating the risk of myocardial infarctions, worsening of heart failure, cardiovascular mortality and all-cause mortality in patients with T2D [26–28]

SGLT2i increases renal glucose excretion thereby lowering plasma glucose and insulin levels and increasing glucagon release, lipolysis and ketogenesis [29,30]. Additionally, tissue glucose uptake and oxidation is reduced and hepatic glucose production increased [31]. The exact cardioprotective mechanisms of SGLT2i are not yet understood, but has been proposed to be linked to improved

1  
2  
3  
4 haemodynamics [32], inhibition of myocardial  $\text{Na}^+/\text{H}^+$  exchange [33,34] or reductions in  
5 inflammatory activity [35,36].  
6  
7

8 An early and interesting hypothesis proposed that changes in cardiac metabolism may be  
9 responsible for the cardioprotective effect of SGLT2i. The lowered glucose and insulin  
10 concentrations, persistent hyperketonaemia and elevated free fatty acids, caused by SGLT2i  
11 treatment, leads to reduced glucose uptake, increased ketone body uptake and oxidation and  
12 unchanged uptake of free fatty acids in the heart while overall lipid oxidation is increased [37,38].  
13 This altered energy metabolism may rapidly improve myocardial function, especially during  
14 myocardial stress [39–42]. The SGLT2i induced myocardial fuel switch from glucose to fatty acids  
15 and ketone bodies, has been suggested to ameliorate adverse cardiac remodelling and heart failure  
16 in nondiabetic porcine models [43], and it is noteworthy that eliminating the availability of free  
17 fatty acids to insulin resistant hearts can lead to cardiac dysfunction in rodents and in humans,  
18 suggesting an important role for lipid metabolism in cardiac function [44–47]. Cardiovascular  
19 endpoint trials with SGLT2 inhibitors have shown effects within weeks after initiation of treatment,  
20 coinciding with the metabolic effects of the treatment [26,38]  
21  
22  
23  
24  
25

26 Altogether, SGLT2 inhibitors “amplify” some components of the dysmetabolic profile of T2D and  
27 works opposite the metabolic effects of insulin. This raises the question of how cardiac function in  
28 patients with T2D depends on lipid and glucose oxidation in the resting state and during stress, and  
29 how increasing or lowering blood glucose, free fatty acids, ketone bodies and insulin concentrations  
30 influence cardiac function.  
31  
32  
33

### 34 Objective

35 The primary objective of the present study is to evaluate myocardial function in patients with T2D  
36 and high risk of CV events using advanced cardiac magnetic resonance imaging (CMR) scans  
37 during rest, chronotropic stress and under depletion of plasma free fatty acids before and after 5  
38 weeks of empagliflozin treatment (high free fatty acid and ketone body concentrations, high lipid  
39 oxidation and low insulin concentrations) and before and after 5 weeks of human insulin treatment  
40 titrated to yield glycaemic control similar to the empagliflozin treatment period (low free fatty acid  
41 and ketone body concentrations, high insulin concentrations and glucose oxidation).  
42  
43  
44  
45  
46  
47

### 48 Hypothesis

49 We hypothesise that hyperinsulinemia and hyperglycaemia are conditions that negatively affect  
50 cardiac function in T2D, while the availability of free fatty acids and ketone bodies and switching  
51 metabolism towards lipid oxidation improves cardiac diastolic and systolic function. Thus, we  
52 expect that lowering plasma glucose insulin-independently, and increasing fatty acid  
53 concentrations, lipid oxidation and ketone body availability with empagliflozin treatment, improves  
54 myocardial function in patients with T2D, and that depleting plasma of free fatty acids during  
55 empagliflozin treatment will impair cardiac function.  
56  
57  
58  
59  
60

## METHODS AND ANALYSES

### Design

This is a 20-week prospective, investigator-initiated, comparator controlled, open label, 2-arm cross-over, human study where subjects are randomised in blocks of 3-5 to NPH insulin or Empagliflozin treatment (25 mg once daily) for  $5\pm 1$  weeks, followed by  $3\pm 1$  weeks wash-out and cross-over of treatment for  $5\pm 1$  weeks (figure 1). For 7 weeks preceding randomisation, but after inclusion, patients undergo a program of 2 weeks of washout of pre-existing antiglycaemic treatment (except metformin), 2 weeks of empagliflozin run-in (used for glycaemic target and titration of treatment in participants randomised to insulin first, see below) followed by 3 weeks of wash-out. During run-in and treatment periods, participants measure blood glucose twice daily (fasting and before evening meal), and during washouts patients measure fasting blood glucose. After the screening visit (V0) there are four study visits (V1-4) – before and at the end of each treatment period. Each visit consists of three study days – a metabolic study day (MET) and two CMR study days. Randomisation is performed at V1 after the metabolic study day.

### Participants

Twenty subjects older than 18 years diagnosed with T2D, a BMI  $\geq 28$  kg/m<sup>2</sup>, HbA1c  $\leq 9\%$ , fasting C-peptide  $>500$  pmol/L and unchanged antiglycaemic treatment for 12 weeks prior to screening, and who are at a risk of cardiovascular disease (CVD), are eligible for the study. High CVD risk is modified from the EMPA-REG protocol [48]. Inclusion, exclusion and withdrawal criteria are listed in Box 1.

### Recruitment

Participants are recruited from the Department of Endocrinology and Cardiology at Hvidovre Hospital and are identified by reviewing laboratory results and patient files. Potential participants will be contacted by means of a recruitment letter, in which they are informed of the opportunity to participate in a scientific research project. We also will advertise for participant in local newspapers and on the internet as well as social media (e.g. [www.forsogsperson.dk](http://www.forsogsperson.dk); [www.sundhed.dk](http://www.sundhed.dk) and [www.facebook.com](http://www.facebook.com)).

### Outcomes

The primary outcome is change in myocardial diastolic function. This was chosen because firstly, diastole is a highly energy requiring process [11,12], and secondly, because diastolic dysfunction (with or without LV hypertrophy) is the notable early manifestation of diabetic cardiomyopathy [49]. Thus, if changes in overall energy metabolism are to affect cardiac function in patients with T2D, it may well occur in diastole at the earliest. Diastolic cardiac function can be accurately assessed using CMR by measuring left ventricular peak filling rate (LVPFR) and left atrial passive emptying fraction (LAPEF) [50]. Our primary outcome measure is change (LVPFR<sub>treatment</sub> – LVPFR<sub>wash-out</sub>) in LVPFR ( $\Delta$ LVPFR). All endpoints are listed in Box 2.

### Randomisation and intervention



1  
2  
3  
4  
5  
6  
7  
8  
9  
10  
11  
12  
13  
14  
15  
16  
17  
18  
19  
20  
21  
22  
23  
24  
25  
26  
27  
28  
29  
30  
31  
32  
33  
34  
35  
36  
37  
38  
39  
40  
41  
42  
43  
44  
45  
46  
47  
48  
49  
50  
51  
52  
53  
54  
55  
56  
57  
58  
59  
60

Participants are randomised consecutively by lottery in blocks of 3-5 to treatment with either subcutaneous NPH insulin (Insulatard®) twice daily or oral empagliflozin (Jardiance®) 25 mg once daily first. All patient will receive both treatments during the trial. Randomisation is performed at V1. NPH insulin is initiated at a dose of 0.2 IU/kg body weight/day and is titrated daily over phone (phone contacts, figure 1) by 0.05 IU/kg body weight/day until average blood glucose over three consecutive days is within  $\pm 1$  mmol/L of the individual glycaemic target. In participants randomised to insulin first, the glycaemic target is average fasting and evening glucose concentrations during the second week of empagliflozin run-in. In patients randomised to insulin second, the glycaemic target is average fasting and pre-prandial evening BG values of week 3 and 4 during the first (empagliflozin) treatment period.

As previously discussed, insulin and empagliflozin represents two metabolically opposing methods for lowering plasma glucose concentrations. By titrating insulin treatment to match the glycaemic control found with empagliflozin in the same participants, the result is two distinct metabolic phenotypes: one with hyperinsulinemia and suppressed levels of FFAs (NPH insulin treatment), and one with reduced insulin levels and increased levels of FFAs (empagliflozin treatment) - but both with the same levels of glycaemic control (Figure 2). NPH Insulin has been chosen over more modern human insulin analogues, as it is not albumin bound and can be measured in an ordinary insulin assay.

#### Safety considerations

During washout periods blood glucose concentrations will increase – that is a separate point of the study, but severely dysregulated diabetes is an exclusion criterium to ensure participant safety. The risk of severe hyperglycaemia is reduced in several ways in the study:

- Existing metformin treatment is continued throughout the whole study as background antiglycaemic treatment.
- In case of fasting BG concentrations of more than 13 mmol/L, patients are instructed to contact study personnel.
- Phone contacts by study investigator are planned in the second week of washout periods to follow up on the patient and enquire to hyperglycaemic events or other adverse events.
- As soon as the final day (CMR with acipimox) of a washout visit (visit 1 or 3) is completed, antiglycaemic treatment according to study drug sequence is commenced to minimise time spent in hyperglycaemia.

In case of fasting BG > 13 mmol/L, the patient will be contacted daily for two additional days. If average fasting BG over the 3 days > 13 mmol/L that triggers an extra safety visit, where fasting plasma glucose (PG) is measured. If PG > 13 mmol/L on the day of the extra visit, then the patient is withdrawn from the study and antihyperglycaemic treatment is initiated.

#### Screening visit (V0)

Once oral and written informed consent is obtained by the study investigator, the screening procedure follows. Medical history is recorded, screening blood samples drawn, and an ECG, recording of blood pressure, pulse rate and registration of anthropometric data are performed, and patients are screened according to in- and exclusion criteria. A standard transthoracic echocardiography is performed, and VO<sub>2</sub>max is estimated (Box 3).

## Study visits

All study visits consist of three study days – a metabolic study day and two CMR study days (Box 4).

### The metabolic study day

The metabolic study is conducted at the Department of Endocrinology, Hvidovre Hospital, to document the metabolic effects of each study drug.

Participants meet in the morning after an overnight fast. Anthropometric data, blood pressure, pulse rate and an ECG are recorded, and two catheters, one in each arm are inserted for infusion of tracers and for repeated drawing of arterialised blood samples respectively. Baseline and safety blood samples are taken (Box 5), the participant empties bladder and the investigational drug (V2, V4) and the participants usual medications are administered at 0800h. Body composition is determined by Dual energy x-ray absorptiometry scan (DXA).

### Basal metabolism

Primed infusions of stable glucose ([6,6-D<sub>2</sub>]-glucose) and glycerol ([1,1,2,3,3-D<sub>5</sub>]-glycerol) tracers are initiated (T=-180 min). Blood is sampled at -30, -15 and -2 min to characterise glucose, lipid and amino acid metabolism. The patient empties bladder, urine is weighed, and samples are taken for determination of tracer concentrations and urinary nitrogen excretion, and the 5h-OGTT is initiated.

### 5h-OGTT

The patient ingests anhydrous glucose (72 g) with added [U-13C<sub>6</sub>]-glucose tracer (3 g) dissolved in 250 mL of water over 5 minutes (T=0 min). Intravenous tracer infusions continue unchanged. Blood is sampled regularly for 5 hours for characterisation of postprandial glucose, lipid and amino acid metabolism (Box 4 and 5). The patient empties bladder regularly during and at the end of the OGTT. Urine is sampled for nitrogen excretion and tracers/tracees.

Fat and muscle biopsies: Biopsies are obtained during the basal (T=-60 min) and the maximally insulin stimulated (T=60 min) state. Muscle biopsies are considered proxies for cardiomyocyte metabolic status. 30 min ventilated hood indirect calorimetry (Vyair Vytus® CPX) is performed during the basal period (prior to biopsies) t= -90 min and postprandially at t=60 min for determination of fasting and postprandial energy expenditure and respiratory quotient.

### Exercise test (50% VO<sub>2</sub>max)

At T=300 min, the participant is exercised at 60 W for 4 minutes after which work load is increased until oxygen consumption is 50% of estimated VO<sub>2</sub>max. Pulse rate is recorded with a chest mounted pulse rate monitor and oxygen consumption with a mask mounted indirect calorimeter. Blood is sampled to characterise glucose, lipid and amino acid metabolism (Box 4 and 5). After 30 min, VO<sub>2</sub>max is estimated by increasing workload by 50W until a pulse rate increase of 30. When

1  
2  
3  
4 pulse is steady for 2 min, oxygen consumption and pulse rate are recorded, and the test is stopped.  
5 VO<sub>2</sub>max is estimated by linear extrapolation to the theoretical maximum pulse rate (220-age).  
6  
7  
8

#### 9 *Ad libitum* meal test

10 SGLT2 inhibition is associated with a lower weight reduction than predicted from the urinary  
11 energy loss. SGLT2 inhibition does not change resting energy expenditure or blunt the thermogenic  
12 effect of feeding, suggesting that energy intake is increased [38]. Therefore, the metabolic study day  
13 is ended with an *ad libitum meal*, consisting of thoroughly mixed pasta bolognese (fixed nutrient  
14 composition and energy content). Patients are placed in a quiet corner and instructed to eat until  
15 full. Two glasses of water (total 300 mL) are allowed with the meal. The meal is weighed before  
16 and after serving and *ad libitum* meal intake defined as the difference. Throughout the day patients  
17 are asked to score their hunger, satiety and sensation of fullness on a visual analogue scale [51].  
18  
19  
20  
21

#### 22 Cardiac evaluation

23 Two CMR days are performed during each visit (V1-V4). In addition, diurnal blood pressure and  
24 Holter monitoring are performed. CMR is conducted at the Department of Cardiology,  
25 Rigshospitalet, Copenhagen, whereas Holter monitoring and diurnal blood pressure monitoring are  
26 performed at the Department of Cardiology, Hvidovre Hospital.  
27  
28

29 Participants meet fasting and morning medication, including investigational medicinal product (V2  
30 and V4), is administered. Anthropometric data are recorded, and two intravenous catheters are  
31 inserted into an antecubital and the contralateral dorsal hand vein for infusion of adenosine,  
32 gadolinium contrast and glycopyrrolate and for blood sampling respectively (Box 5). Prior to CMR  
33 a transthoracic echocardiography is performed (Box 3)  
34  
35  
36

37 CMR is performed on a 1.5 Tesla scanner (Siemens Aera; Siemens; Erlangen; Germany) with the  
38 patient lying supine on the back, using an 18-channel cardiac coil with continuous ECG gating.  
39  
40

41 Cine 2-, 3- and 4-chamber images, complete transverse and short axis cine stacks covering the  
42 whole heart are acquired. All images are obtained during end-expiratory breath-holds.  
43 Myocardial perfusion images during rest and stress are obtained at the basal, mid-ventricular and  
44 apical cardiac short-axis level. Rest perfusion images of the myocardium is acquired using an  
45 intravenous bolus of gadolinium contrast (Gadovist®, Bayer AG, Germany) 0.075 mmol/kg  
46 bodyweight. The time of gadolinium contrast entry into the right and the left ventricle is accurately  
47 determined, and this transit time of gadovist multiplied by cardiac output is used to calculate the  
48 pulmonary and central (pulmonary + cardiac) blood volume.  
49  
50  
51  
52

53 Myocardial stress perfusion images are obtained with an i.v dose of 0.075 mmol/kg of gadovist  
54 during and 10 min after an intravenous adenosine (140 µg/min) administrated for maximum 4  
55 minutes). This is followed by evaluation of cardiac function during chronotropic stress, where short  
56 axis cine stack will be reacquired 10 minutes after the administration of intravenous glycopyrrolate  
57  
58  
59  
60

1  
2  
3  
4 (4 µg/kg, max. 400µg, given as a bolus). This approach has been shown to unmask subclinical  
5 diastolic dysfunction as has been demonstrated in normal healthy elderly [50].  
6  
7  
8  
9

#### 10 Cardiac MRI, Acipimox

11 CMR scans will follow the same procedure as described above, but participants are instructed to  
12 ingest 250 mg acipimox p.o. twice, 4 hours before and right before the scan, to determine  
13 myocardial function. This repeated administration of acipimox is required for adequate suppression  
14 of hormone sensitive lipase activity and depletion of plasma FFAs (28). This has been shown to  
15 gradually impair cardiac function [52], and is done to disclose any coupling between FFA  
16 availability and cardiac function.  
17  
18  
19

#### 20 CMR image analysis

21 Is performed using Circle42 (Circle Cardiovascular Imaging Inc., Calgary Canada, v5.5.1). LV  
22 volumes, LV mass, LV ejection fraction (LVEF) and LV peak filling rate are determined by tracing  
23 of the endo- and epicardial contours in end-diastolic and end-systolic phases. The papillary muscles  
24 are excluded from the myocardium. On native and post-contrast T1-mappings, endocardial and  
25 epicardial borders are traced, and the mean extra cellular volume (ECV) is calculated from areas  
26 outside late gadolinium enhancement (LGE) lesions. For determination of the ECV within an LGE  
27 lesion, myocardium without LGE in the segment is excluded. Myocardial perfusion scans are  
28 inspected for perfusion defects. Regions with infarctions, sub-endocardial perfusion defects or dark-  
29 rim artefacts will be excluded. Blinded to clinical data, the analyses will be reviewed and finalised  
30 by two CMR specialist.  
31  
32  
33  
34

#### 35 Diurnal blood pressure and Holter monitoring

36 Between study days during each visit, diurnal blood pressure is recorded (ScottCare, ABP 320,  
37 Cleveland, OH) for 24 hours with 15 minutes intervals between 6.00 to 22.00- and 60-min  
38 intervals during night-time. Cardiac rhythm is evaluated with Holter monitoring (SCOTTCARE,  
39 CHROMA, model RZ153C, Cleveland, OH) for 48 hours.  
40  
41  
42

#### 43 Patient and public involvement

44 No patient involved.  
45  
46  
47

## 48 ANALYSES

### 49 Blood and tissue samples

50 Subcutaneous fat- and muscle biopsies: Local analgesia is applied before sampling with a  
51 Bergströms cannula. Samples are immediately frozen in liquid nitrogen and stored at -80°C. Blood  
52 and urine samples: Samples are spun, aliquoted and stored at -20°C (GLP-1, PYY, Glucagon) or -  
53 80°C for later analysis. Bedside plasma glucose measurements are performed using the glucose  
54 oxidase technique (YSI model 2300 STAT Plus; YSI, Yellow Springs, OH). Home blood glucose  
55 measurements are carried out on Contour XT (Ascensia Diabetes Care Holdings AG, Basel,  
56  
57  
58  
59  
60

Switzerland). Safety blood- and urine samples are analysed on the same day at the Department of Clinical Biochemistry, Hvidovre Hospital.

## Statistical methods

### Sample size calculation

Measures of myocardial function are highly reproducible when assessed using CMR, and interstudy and cohort coefficients of variation are in the range of 3-5% [53–55]

Using the same CMR protocol as the present, Ahtarovski et al found a mean difference of 92 ml/s in Left Ventricular Peak Filling Rate between healthy young ( $585\pm 62$  ml/s) and healthy elderly subjects ( $493\pm 55$  ml/s) [55]. We assume that T2D patients have LVPFR corresponding to healthy elderly subjects, and we assume that empagliflozin treatment improves LVPFR by 30 ml/s ( $\Delta$ LVPFR=30 ml/s) from baseline and that insulin treatment does not improve LVPFR ( $\Delta$ LVPFR=0 ml/s).

Conservatively setting the standard deviation of between treatment differences of  $\Delta$ LVPFR at 30 ml/s, a number of 20 patients would be adequate to determine a 30 ml/s difference between the two treatments with a power of 93% and a two-sided significance level of 0.01, when evaluating data with the paired student's t-test. In case of a 20% dropout rate, power would still be acceptable (83%,  $p=0.01$ ).

### Statistical analysis plan

The primary and secondary endpoints are analysed assuming no period effect or treatment-period interaction. This assumption is reasonable, given results from similar studies, where no such interactions or effects have been reported [56]. Normally distributed data are presented using standard descriptive statistics, and reported as mean (SD) for normally distributed and median (Q1;Q3) for non-normally distributed data. Likewise, comparisons of normally distributed data is done using the paired Student's t-test for all completers, whereas Wilcoxon's paired signed rank test will be used if data is non-normally distributed.

### Timeframe

Screenings are performed from January 2018. Last patient, last visit is expected second half of 2021 after which the study will be unregistered with the Danish Medicines Agency and the Capital Region Municipal Ethical Committee within 90 days. Data analyses are expected to be completed by Winter 2022. No later than 12 months after unregistering of the study, will results be made available at [www.clinicalregister.eu](http://www.clinicalregister.eu). Trial registration number: EudraCT: 2017-002101.

## ETHICS AND DISSEMINATION

The study is conducted according to ICH GCP guidelines E6 (R2) and the Helsinki Declaration and all participants will provide oral and written informed consent. The study is approved by the Danish Medicines Agency (ref. id: 2017061587), The Capital Region Ethical Committee (H-17018846) and the Danish Data Protection Agency (AHH-2017-093). Our results, regardless of outcome, will be published in relevant scientific journals. In addition, we will seek to disseminate results through presentations at scientific meetings. Publication will take place as soon as scientifically feasible.



## DISCUSSION

The profound and swift benefits of SGLT2i on cardiovascular risk in T2D have inspired the discussion of metabolism and its importance for cardiac function in patients with T2D [57–61]. Especially since, SGLT2 inhibitors have metabolic effects that by and large are opposite to those of insulin treatment. Thus, insulin treatment is associated with increased tissue glucose uptake and utilisation, but suppression of lipid mobilisation and oxidation as well as lowering of plasma concentrations of ketone bodies [62]. SGLT2 inhibitors increase lipid mobilisation and oxidation, increase plasma ketone body concentrations and reduce tissue glucose uptake [38,63]. Both treatments lower plasma glucose, but insulin treatment increases whereas SGLT2i treatment decreases plasma insulin concentrations. Whether such changes in metabolism affect cardiac function, is still unsettled, but forcing cardiac glucose uptake and utilisation through insulin treatment has been suggested by some to benefit and by others to impair cardiac function [47,64–67], while yet others have suggested increased lipid and ketone body oxidation to be important for proper cardiac function in T2D [46,58,67]. Studies on SGLT2i treatments and the effects on cardiac function are beginning to emerge. In a recent study, 42 patients with T2D were randomised to 12 weeks of empagliflozin 10 mg or placebo once daily. SGLT2 inhibition was shown to rapidly improve diastolic cardiac function as evaluated with echocardiography [68]. In a placebo controlled cross-over design, after 4 weeks of empagliflozin treatment in patients with T2D, myocardial glucose uptake was reduced and fatty acid oxidation unaltered, but this did not significantly change myocardial oxygen consumption or cardiac efficiency, nor any measure of cardiac function [69]. In a Swedish study, 6 weeks dapagliflozin treatment showed unchanged cardiac fatty acid uptake, a trend toward reduced left atrial maximal volume, and reduced LV oxygen consumption and external work compared to placebo [70], and in the only study found, where an active comparator was used, 10 mg empagliflozin once daily for 12 weeks did not change cardiac lipid accumulation (as measured by MR spectrometry), cardiac function or cardiac metabolism compared to sitagliptin 50 mg daily [71].

In conclusion, existing studies in humans have shown divergent results regarding changes in cardiac diastolic function with little changes in cardiac metabolism. However, most studies have compared cardiac effects of SGLT2i to placebo, thus not accounting for the circumstances that characterised the EMPA-REG trial, where anti glycaemic treatment was intensified in the placebo group concurrently [26]. Thus, the CVD risk benefits of the study may have arisen from unfavourable metabolic consequences of the treatment in the placebo arm. In the one study with an active comparator empagliflozin was compared to sitagliptin, which not only affects the incretin system but also has less specific metabolic effect [72]. Therefore, to date our study, is the one to most directly pursue the coupling between metabolism and cardiac function, by choosing insulin as the comparator, and by including the effects of acute lowering of free fatty acid concentrations in plasma on cardiac function.

### Disclosure summary

All authors have completed the ICMJE uniform disclosure form and declare: no support from any organisations for the submitted work; SM and NBJ have received research grants from Boehringer Ingelheim and JJH serves on advisory boards for Novo Nordisk, no other relationships or activities that could appear to have influenced the submitted work.



## Funding

The study is funded by an investigator-initiated study grant from Boehringer Ingelheim. Additional funding comes from Grosserer L. F. Foghts Fond, Charlottenlund, Denmark. Grant numbers not applicable.

## Contributions

### Author contributions

RT will be conducting the study, collect all the data, perform data analyses and co-submit the study. EAR has contributed to the study design, designed the keton body- and biopsy analysis scheme and is going to perform these analyses. JPG designed the pro-ANP and pro-BNP analysis scheme and is going to perform these analyses. MF designed multiple metabolic analysis schemes (Triglycerides, insulin, free fatty acids, uric acid, urea and nitrogen) and is going to perform these analyses.

GVH designed the three-tracer measuring analysis schemes we are using in this study and is going to perform these analyses. UD provided the study with analysis tools (holter-monitors and blood pressure monitors). He will perform the analyses of these data.

JJH participated in the protocol design, designed multiple metabolic analyses (GLP-1, glucagon and PYY) and will perform the analyses of these data.

SM is the principal investigator, co-planned the study and contributed with several analysing tools. NV co-designed the cardiac MRI guideline for the study and contributed with analysing tool (MRI scanner). PLM co-planned the study, co-designed the cardiac MRI guideline for the study and will analyse the cardiac MRI data.

NBJ co-planned the study, will perform all data analyses with RT and co-submit the study. All of the authors contributed with writing, revising and approving this manuscript.

| Box 1: Eligibility criteria                                                                                                                                                                                                                                                                                                                                                                                                                                                                                                                                                                                                                                                                                                                                                                                                                                                                                                                                                                                                   |
|-------------------------------------------------------------------------------------------------------------------------------------------------------------------------------------------------------------------------------------------------------------------------------------------------------------------------------------------------------------------------------------------------------------------------------------------------------------------------------------------------------------------------------------------------------------------------------------------------------------------------------------------------------------------------------------------------------------------------------------------------------------------------------------------------------------------------------------------------------------------------------------------------------------------------------------------------------------------------------------------------------------------------------|
| <p><b>Inclusion criteria</b></p> <p>Age <math>\geq 18</math> years</p> <p>BMI <math>\geq 28</math> kg/m<sup>2</sup></p> <p>HbA1c <math>\leq 9\%</math> (<math>\leq 10\%</math> in diet or metformin treated only)</p> <p>Fasting C-peptide <math>\geq 500</math> pmol/L</p> <p>Unchanged glycaemic treatment for 3 months prior to inclusion</p> <p>High cardiovascular risk as one of the following:</p> <ul style="list-style-type: none"> <li>• Previous myocardial infarction, stroke or peripheral arterial disease more than 2 months prior to informed consent</li> <li>• Evidence of multi-vessel coronary arterial disease (CAD) but without prior myocardial infarction, if more than 50% stenosis is present, if revascularised (CABG or PCI) more than 2 months prior or if 1 vessel is vascularised and the other with 50% stenosis.</li> <li>• Single vessel CAD without prior myocardial infarction if more than 50% stenosis is present, not revascularised and positive stress test for ischemia.</li> </ul> |

1  
2  
3  
4  
5  
6  
7  
8  
9  
10  
11  
12  
13  
14  
15  
16  
17  
18  
19  
20  
21  
22  
23  
24  
25  
26  
27  
28  
29  
30  
31  
32  
33  
34  
35  
36  
37  
38  
39  
40  
41  
42  
43  
44  
45  
46  
47  
48  
49  
50  
51  
52  
53  
54  
55  
56  
57  
58  
59  
60**Exclusion criteria**

Insulin treatment within 3 months from informed consent

Type 1 diabetes

Psychiatric disorder or mental retardation

Drug or alcohol abuse within 3 months from informed consent

Poor compliance

Anaemia (Hb < 6.4 mmol/L) or other blood dyscrasias causing haemolysis or unstable erythrocytes.

Indication of liver disease (ALT or Alkaline phosphatase elevation above 3x upper normal limit)

Impaired renal function (eGFR < 45 ml/min/1.73 m<sup>2</sup>)

Anti-obesity medication within 3 months from informed consent

Systemic steroid treatment within 6 weeks from informed consent.

Any uncontrolled endocrine disorder except T2D

Bariatric surgery or other gastrointestinal conditions that may compromise gastrointestinal absorption

Peptic ulcer – verified endoscopically

Any form of surgery within 3 months of informed consent

Acute myocardial infarction, stroke or peripheral arterial disease within 2 months of informed consent.

Persistent or permanent atrial fibrillation

Inability to undergo experimental procedures including exclusion criteria for CMR scanning:

Implantable cardioverter defibrillator/pacemaker

Ferromagnetic clips

Claustrophobia.

Contraindication to glycopyrrolate infusion:

Known closed-angle glaucoma

known severe prostate hyperplasia

Tachycardia (HR > 100 at rest)

Known bladder atony

Cardia insufficiency or non-congenital pylorus stenosis –verified endoscopically

Known gastroparesis

Contraindications to adenosine:

2nd or 3rd degree atrioventricular block

Severe hypotension (BP ≤ 90/50 mmHg)

Long QT syndrome

Unstable angina pectoris

Decompensated heart failure

Sinus node dysfunction

Chronic obstructive pulmonary disease or asthma bronchiale (FEV1 ≤ 50% of expected)

1  
2  
3  
4  
5  
6  
7  
8  
9  
10  
11  
12  
13  
14  
15  
16  
17  
18  
19  
20  
21  
22  
23  
24  
25  
26  
27  
28  
29  
30  
31  
32  
33  
34  
35  
36  
37  
38  
39  
40  
41  
42  
43  
44  
45  
46  
47  
48  
49  
50  
51  
52  
53  
54  
55  
56  
57  
58  
59  
60

|                                                                                                                                                                                                                                                                                                    |
|----------------------------------------------------------------------------------------------------------------------------------------------------------------------------------------------------------------------------------------------------------------------------------------------------|
| <p>Allergy towards any of the drugs or diagnostics used in the protocol (insulin, empagliflozin, acipimox, glycopyrrolate, adenosine, gadolinium contrast enhancer).<br/>Any condition which in the opinion of the investigator may jeopardize subject safety or compliance with the protocol.</p> |
| <p>Withdrawal criteria</p>                                                                                                                                                                                                                                                                         |
| <p>Subjects may withdraw from the study without any notice or reason<br/>Pregnancy discovered during the experiment<br/>Unacceptable adverse reactions or reactions associated with the planned experiments, including severe glycaemic dysregulation during washout periods.</p>                  |

|                                      |                                                                                                                                                                                                                                                                                                                                                                                                                                                                                                                                                                                                                                                                                                        |
|--------------------------------------|--------------------------------------------------------------------------------------------------------------------------------------------------------------------------------------------------------------------------------------------------------------------------------------------------------------------------------------------------------------------------------------------------------------------------------------------------------------------------------------------------------------------------------------------------------------------------------------------------------------------------------------------------------------------------------------------------------|
| <p>Box 2: Endpoints</p>              |                                                                                                                                                                                                                                                                                                                                                                                                                                                                                                                                                                                                                                                                                                        |
| <p>Primary end point</p>             | <p>Change in left ventricular peak filling rate (<math>\Delta</math>LVPFR)</p>                                                                                                                                                                                                                                                                                                                                                                                                                                                                                                                                                                                                                         |
| <p>Secondary endpoints</p>           | <p>Change in left atrial passive emptying fraction (<math>\Delta</math>LAPEF)<br/>Change in left ventricular ejection fraction (<math>\Delta</math>LVEF)</p>                                                                                                                                                                                                                                                                                                                                                                                                                                                                                                                                           |
| <p>Explorative endpoints include</p> | <p>Cardiovascular:<br/>Change in VO<sub>2</sub>max and exercise tolerance test variables<br/>Change in central blood volume and haematocrite<br/>Change in heart rate variability<br/>Change in left ventricular volume</p> <p>Metabolic:<br/>Basal and postprandial AUC Free Fatty Acids and glycerol turnover<br/>Endogenous glucose production and tissue glucose disposal (metabolic clearance of glucose)<br/>Fasting and postprandial energy expenditure and respiratory quotient<br/>Glucagon-Insulin ratio<br/>Insulin sensitivity (AUC glucose metabolic clearance / AUC insulin concentration)<br/>Beta-cell function (prehepatic insulin secretion rate, correlated to ambient glucose)</p> |

1  
2  
3  
4  
5  
6  
7  
8  
9  
10  
11  
12  
13  
14  
15  
16  
17  
18  
19  
20  
21  
22  
23  
24  
25  
26  
27  
28  
29  
30  
31  
32  
33  
34  
35  
36  
37  
38  
39  
40  
41  
42  
43  
44  
45  
46  
47  
48  
49  
50  
51  
52  
53  
54  
55  
56  
57  
58  
59  
60

| Box 3: Screening procedures       |                                                                                                                                                                                                                                                                                                                                                                              |
|-----------------------------------|------------------------------------------------------------------------------------------------------------------------------------------------------------------------------------------------------------------------------------------------------------------------------------------------------------------------------------------------------------------------------|
| Blood samples                     | Haematology (haemoglobin, thrombocytes, haematocrit, leukocytes), liver and renal function tests (creatinine, eGFR (Cockcroft-Gault formula), alkaline phosphatases, alanine aminotransferases, lactate dehydrogenase, bilirubin, amylase, sodium, potassium), fasting P-glucose, C-peptide, HbA1c, TSH, Urinary Albumin/creatinine mass ratio, and in fertile women, U-hCG. |
| Echocardiography                  | Parasternal long axis view, parasternal short axis view at aortic, mitral and apex levels, apical 4-chamber view, LVEF, E/E', E', LVEDV/BSA.                                                                                                                                                                                                                                 |
| Estimation of VO <sub>2</sub> max | Maximum oxygen uptake is estimated using Åström's two-point test performed on a cycle ergometer during indirect calorimetry. From measurements of VO <sub>2</sub> at two sub-maximal pulse rates VO <sub>2</sub> max is estimated by linear extrapolation to the theoretical maximal pulse rate (220-age) [73].                                                              |

| Box 4: Visit overview                                                                                                                                                                                                                                                                                                                                                                                                                                                                                                                                                                                                                        |                                                                                                                                                                                                                                                                                                                                                                                                            |                                                                                                                                                                                                                                            |
|----------------------------------------------------------------------------------------------------------------------------------------------------------------------------------------------------------------------------------------------------------------------------------------------------------------------------------------------------------------------------------------------------------------------------------------------------------------------------------------------------------------------------------------------------------------------------------------------------------------------------------------------|------------------------------------------------------------------------------------------------------------------------------------------------------------------------------------------------------------------------------------------------------------------------------------------------------------------------------------------------------------------------------------------------------------|--------------------------------------------------------------------------------------------------------------------------------------------------------------------------------------------------------------------------------------------|
| Metabolic study day                                                                                                                                                                                                                                                                                                                                                                                                                                                                                                                                                                                                                          | Cardiac MR                                                                                                                                                                                                                                                                                                                                                                                                 | Cardiac MR, Acipimox                                                                                                                                                                                                                       |
| <ul style="list-style-type: none"> <li>- DXA-scan and fasting safety and efficacy blood samples</li> <li>- Determination of 3-hour basal metabolism.</li> <li>-- Infusion of glucose and glycerol tracers</li> <li>-- Basal muscle and fat biopsies</li> <li>-- Basal energy expenditure and determination of respiratory quotient</li> <li>- 5-hour OGTT</li> <li>-- with oral glucose tracer and</li> <li>-- continued intravenous glucose and glycerol tracer.</li> <li>-- Fat- and muscle biopsies at maximum insulin stimulation</li> <li>- Exercise test and determination of VO<sub>2</sub>max</li> <li>- Ad libitum meal.</li> </ul> | <ul style="list-style-type: none"> <li>- Fasting blood samples, before and after CMR.</li> <li>- Echocardiography</li> <li>- CMR Rest</li> <li>-- Without enhancement</li> <li>-- With enhancement and adenosine infusion</li> <li>- CMR Stress</li> <li>-- Unenhanced repeated during pharmacological chronotropic stress with glycopyrrolate infusion.</li> <li>- 24h ambulant blood pressure</li> </ul> | <ul style="list-style-type: none"> <li>Same protocol as Cardiac MR day, but during pharmacological suppression of hormone sensitive lipase activity and depletion of plasma free fatty acids.</li> <li>- 48h Holter monitoring.</li> </ul> |

1  
2  
3  
4  
5  
6  
7  
8  
9  
10  
11  
12  
13  
14  
15  
16  
17  
18  
19  
20  
21  
22  
23  
24  
25  
26  
27  
28  
29  
30  
31  
32  
33  
34  
35  
36  
37  
38  
39  
40  
41  
42  
43  
44  
45  
46  
47  
48  
49  
50  
51  
52  
53  
54  
55  
56  
57  
58  
59  
60

| Box 5: Blood samples on metabolic and CMR study days include |                                                                                                                                                                                                                                              |
|--------------------------------------------------------------|----------------------------------------------------------------------------------------------------------------------------------------------------------------------------------------------------------------------------------------------|
| Metabolic study day                                          | Blood samples: glucose, insulin, C-peptide, glucagon, FFAs, triglycerides, total amino acids and ketone bodies (betahydroxybuturate), tracers/tracees, gut hormones.<br>HbA1c, urate, blood urea nitrogen, cortisol, is sampled at baseline. |
| Cardiac MRI days                                             | Markers of cardiac function, including pro-ANP and pro-BNP, glucose, insulin, C-peptide, glucagon, FFAs, triglycerides, ketone bodies, haematocrit are drawn before and after CMR.                                                           |

### Figure legends

**Figure 1. Study outline.** Included patients undergo a 7-week program of washout of pre-existing antiglycemic treatment (except metformin) and run-in of empagliflozin. Hereafter they are randomised to treatment for  $5\pm 1$  weeks, followed by  $3\pm 1$  weeks wash-out and cross-over to  $5\pm 1$  weeks treatment with the remaining study drug. Tests performed at each visit are summarised in Box 4 and 5.

**Figure 2. Metabolic profile of the two study drugs.** Schematic representation of the metabolic changes expected with the two study drug treatments in a patient randomized to insulin first. Insulin treatment is characterized by low glucose, low FFAs and high insulin concentrations; empagliflozin treatment by low glucose, high FFAs and low insulin.

## References:

- 1 Defronzo RA. From the Triumvirate to the Ominous Octet : A New Paradigm for the Treatment of Type 2 Diabetes Mellitus. ;:773–95. doi:10.2337/db09-9028
- 2 De Vegt F, Dekker JM, Ruhé HG, *et al.* Hyperglycaemia is associated with all-cause and cardiovascular mortality in the Hoorn population: The Hoorn study. *Diabetologia* 1999;**42**:926–31. doi:10.1007/s001250051249
- 3 Pyorala M, Miettinen H, Laakso M, *et al.* Plasma insulin and all-cause, cardiovascular, and noncardiovascular mortality: the 22-year follow-up results of the Helsinki Policemen Study. *Diabetes Care* 2000;**23**:1097–102. doi:10.2337/diacare.23.8.1097
- 4 Lakka HM, Lakka TA, Tuomilehto J, *et al.* Hyperinsulinemia and the risk of cardiovascular death and acute coronary and cerebrovascular events in men: The Kuopio Ischaemic Heart Disease Risk Factor Study. *Arch Intern Med* 2000;**160**:1160–8. doi:10.1001/archinte.160.8.1160
- 5 Selvin E, Marinopoulos S, Berkenblit G, *et al.* Meta-analysis: Glycosylated hemoglobin and cardiovascular disease in diabetes mellitus. *Ann Intern Med* 2004;**141**. doi:10.7326/0003-4819-141-6-200409210-00007
- 6 Redfield MM, Jacobsen SJ, Burnett JC, *et al.* Burden of systolic and diastolic ventricular dysfunction in the community: appreciating the scope of the heart failure epidemic. *JAMA* 2003;**289**:194–202. doi:10.1001/JAMA.289.2.194
- 7 Boyer JK, Thanigaraj S, Schechtman KB, *et al.* Prevalence of ventricular diastolic dysfunction in asymptomatic, normotensive patients with diabetes mellitus. *Am J Cardiol* 2004;**93**:870–5. doi:10.1016/J.AMJCARD.2003.12.026
- 8 Jørgensen PG, Biering-Sørensen T, Mogelvang R, *et al.* Predictive value of echocardiography in Type 2 diabetes. *Eur Heart J Cardiovasc Imaging* 2019;**20**:687–93. doi:10.1093/ehjci/jej164
- 9 Tarquini R, Lazzeri C, Pala L, *et al.* The diabetic cardiomyopathy. *Acta Diabetol* 2011;**48**:173–81. doi:10.1007/s00592-010-0180-x
- 10 Komi S, Inoue Y, Hata H, *et al.* Cardiovascular magnetic resonance evaluation of left ventricular peak filling rate using steady-state free precession and phase contrast sequences. *Springerplus* 2016;**5**. doi:10.1186/s40064-016-2878-x
- 11 Diamant M, Lamb HJ, Groeneveld Y, *et al.* Diastolic dysfunction is associated with altered myocardial metabolism in asymptomatic normotensive patients with well-controlled type 2 diabetes mellitus. *J Am Coll Cardiol* 2003;**42**:328–35. doi:10.1016/S0735-1097(03)00625-9
- 12 Rosano G, Coats A. Modulation of Cardiac Metabolism in Heart Failure. *Int Cardiovasc Forum J* 2019;**17**:99–103. doi:10.17987/icfj.v17i0.597
- 13 Ungar I, Gilbert M, Siegel A, *et al.* Studies on myocardial metabolism. IV. Myocardial metabolism in diabetes. *Am J Med* 1955;**18**:385–96. doi:10.1016/0002-9343(55)90218-7
- 14 Rijzewijk LJ, van der Meer RW, Lamb HJ, *et al.* Altered myocardial substrate metabolism and decreased diastolic function in nonischemic human diabetic cardiomyopathy: studies with cardiac positron emission tomography and magnetic resonance imaging. *J Am Coll Cardiol* 2009;**54**:1524–32. doi:10.1016/j.jacc.2009.04.074
- 15 Stanley WC, Lopaschuk GD, Hall JL, *et al.* Regulation of myocardial carbohydrate metabolism under normal and ischaemic conditions. Potential for pharmacological interventions. *Cardiovasc Res* 1997;**33**:243–57. doi:10.1016/S0008-6363(96)00245-3
- 16 Mehta SR, Yusuf S, Díaz R, *et al.* Effect of glucose-insulin-potassium infusion on mortality in patients with acute ST-segment elevation myocardial infarction: The CREATE-ECLA randomized controlled trial. *J Am Med Assoc* 2005;**293**:437–46. doi:10.1001/jama.293.4.437
- 17 Malmberg K, Rydén L, Wedel H, *et al.* FASTTRACK intense metabolic control by means of insulin in patients with diabetes mellitus and acute myocardial infarction (DIGAMI 2): Effects on mortality and morbidity. *Eur Heart J* 2005;**26**:650–61. doi:10.1093/eurheartj/ehi199
- 18 Malmberg K, Rydén L, Efendic S, *et al.* Randomized trial of insulin-glucose infusion followed by subcutaneous insulin treatment in diabetic patients with acute myocardial infarction (DIGAMI study): Effects on mortality at 1 year. *J Am Coll Cardiol* 1995;**26**:57–



65. doi:10.1016/0735-1097(95)00126-K
- 19 NICE-SUGAR Study Investigators, Finfer S, Chittock DR, *et al.* Intensive versus conventional glucose control in critically ill patients. *N Engl J Med* 2009;**360**:1283–97. doi:10.1056/NEJMoa0810625
- 20 Hemmingsen B, Lund SS, Gluud C, *et al.* Intensive glycaemic control for patients with type 2 diabetes: systematic review with meta-analysis and trial sequential analysis of randomised clinical trials. *BMJ* 2011;**343**:d6898. <http://www.pubmedcentral.nih.gov/articlerender.fcgi?artid=3223424&tool=pmcentrez&rendertype=abstract> (accessed 9 Sep 2015).
- 21 Duckworth W, Abraira C, Moritz T, *et al.* Glucose control and vascular complications in veterans with type 2 diabetes. *N Engl J Med* 2009;**360**:129–39. doi:10.1056/NEJMoa0808431
- 22 ADVANCE Collaborative Group, Patel A, MacMahon S, *et al.* Intensive blood glucose control and vascular outcomes in patients with type 2 diabetes. *N Engl J Med* 2008;**358**:2560–72. doi:10.1056/NEJMoa0802987
- 23 Basal Insulin and Cardiovascular and Other Outcomes in Dysglycemia. *N Engl J Med* 2012;**367**:319–28. doi:10.1056/nejmoa1203858
- 24 Action to Control Cardiovascular Risk in Diabetes Study Group, Gerstein HC, Miller ME, *et al.* Effects of intensive glucose lowering in type 2 diabetes. *N Engl J Med* 2008;**358**:2545–59. doi:10.1056/NEJMoa0802743
- 25 Sciences HH, Miller ME, Byington RP, *et al.* Effects of Intensive Glucose Lowering in Type 2 Diabetes. *N Engl J Med* 2008;**358**:2545–59. doi:10.1056/nejmoa0802743
- 26 Zinman B, Wanner C, Lachin JM, *et al.* Empagliflozin, Cardiovascular Outcomes, and Mortality in Type 2 Diabetes. *N Engl J Med* 2015;**373**:2117–28. doi:10.1056/NEJMoa1504720
- 27 McMurray JJV, Solomon SD, Inzucchi SE, *et al.* Dapagliflozin in Patients with Heart Failure and Reduced Ejection Fraction. *N Engl J Med* 2019;**381**:1995–2008. doi:10.1056/nejmoa1911303
- 28 Zou CY, Liu XK, Sang YQ, *et al.* Effects of SGLT2 inhibitors on cardiovascular outcomes and mortality in type 2 diabetes: A meta-analysis. *Med (United States)* 2019;**98**. doi:10.1097/MD.00000000000018245
- 29 Ferrannini E, Muscelli E, Frascerra S, *et al.* Metabolic response to sodium-glucose cotransporter 2 inhibition in type 2 diabetic patients. *J Clin Invest* 2014;**124**:499–508. doi:10.1172/JCI72227
- 30 Merovci A, Solis-Herrera C, Daniele G, *et al.* Dapagliflozin improves muscle insulin sensitivity but enhances endogenous glucose production. *J Clin Invest* 2014;**124**:509–14. doi:10.1172/JCI70704
- 31 Ferrannini E, Baldi S, Frascerra S, *et al.* Renal Handling of Ketones in Response to Sodium – Glucose Cotransporter 2 Inhibition in Patients With Type 2 Diabetes. 2017;**40**:771–6. doi:10.2337/dc16-2724
- 32 Chilton R, Tikkanen I, Cannon CP, *et al.* Effects of empagliflozin on blood pressure and markers of arterial stiffness and vascular resistance in patients with type 2 diabetes. *Diabetes Obes Metab* 2015;**17**:1180–93. doi:10.1111/dom.12572
- 33 Trum M, Riechel J, Lebek S, *et al.* Empagliflozin inhibits Na<sup>+</sup>/H<sup>+</sup> exchanger activity in human atrial cardiomyocytes. 2020;**44**:29–37. doi:10.1002/ehf2.13024
- 34 Baartscheer A, Schumacher CA, Wüst RCI, *et al.* Empagliflozin decreases myocardial cytoplasmic Na<sup>+</sup> through inhibition of the cardiac Na<sup>+</sup>/H<sup>+</sup> exchanger in rats and rabbits. 2017;**568**–73. doi:10.1007/s00125-016-4134-x
- 35 Garvey WT, Gaal L Van, Leiter LA, *et al.* Effects of canagliflozin versus glimepiride on adipokines and inflammatory biomarkers in type 2 diabetes ☆. 2018;**85**:32–7. doi:10.1016/j.metabol.2018.02.002
- 36 Heerspink HJL, Perco P, Mulder S, *et al.* Canagliflozin reduces inflammation and fibrosis biomarkers : a potential mechanism of action for beneficial effects of SGLT2 inhibitors in diabetic kidney disease. 2019;**1154**–66.
- 37 Lauritsen KM, Nielsen BRR, Tolbod LP, *et al.* SGLT2 Inhibition Does Not Affect

1  
2  
3  
4  
5  
6  
7  
8  
9  
10  
11  
12  
13  
14  
15  
16  
17  
18  
19  
20  
21  
22  
23  
24  
25  
26  
27  
28  
29  
30  
31  
32  
33  
34  
35  
36  
37  
38  
39  
40  
41  
42  
43  
44  
45  
46  
47  
48  
49  
50  
51  
52  
53  
54  
55  
56  
57  
58  
59  
60

- Myocardial Fatty Acid Oxidation or Uptake, But Reduces Myocardial Glucose Uptake and Blood Flow in Individuals With Type 2 Diabetes— a Randomized Double-Blind, Placebo-Controlled Crossover Trial. *Diabetes* 2020;:db200921. doi:10.2337/db20-0921
- 38 Ferrannini E, Muscelli E, Frascerra S, *et al.* Metabolic response to sodium-glucose cotransporter 2 inhibition in type 2 diabetic patients. *J Clin Invest* 2014;**124**:499–508. doi:10.1172/JCI72227
- 39 Jørgensen NB, Pedersen J, Vaag AA. EMPA-REG: Glucose excretion and lipid mobilization – not storage – saves lives. *J Diabetes Complications* 2016;**30**:753. doi:10.1016/j.jdiacomp.2016.02.015
- 40 Ekanayake P, Hupfeld C, Mudaliar S. Sodium-Glucose Cotransporter Type 2 (SGLT-2) Inhibitors and Ketogenesis: the Good and the Bad. *Curr Diab Rep* 2020;**20**. doi:10.1007/s11892-020-01359-z
- 41 Ferrannini E, Mark M, Mayoux E. CV protection in the EMPA-REG OUTCOME trial: A thrifty substrate hypothesis. *Diabetes Care* 2016;**39**:1108–14. doi:10.2337/dc16-0330
- 42 Nielsen R, Møller N, Gormsen LC, *et al.* Cardiovascular Effects of Treatment With the Ketone Body 3-Hydroxybutyrate in Chronic Heart Failure Patients. *Circulation* 2019;**139**:2129–41. doi:10.1161/CIRCULATIONAHA.118.036459
- 43 Santos-Gallego CG, Requena-Ibanez JA, San Antonio R, *et al.* Empagliflozin Ameliorates Adverse Left Ventricular Remodeling in Nondiabetic Heart Failure by Enhancing Myocardial Energetics. *J Am Coll Cardiol* 2019;**73**:1931–44. doi:10.1016/j.jacc.2019.01.056
- 44 Wolf P, Winhofer Y, Krssak M, *et al.* Suppression of plasma free fatty acids reduces myocardial lipid content and systolic function in type 2 diabetes. *Nutr Metab Cardiovasc Dis* 2016;**26**:387–92. doi:10.1016/j.numecd.2016.03.012
- 45 Tuunanen H, Engblom E, Naum A, *et al.* Free fatty acid depletion acutely decreases cardiac work and efficiency in cardiomyopathic heart failure. *Circulation* 2006;**114**:2130–7. doi:10.1161/CIRCULATIONAHA.106.645184
- 46 Harmancey R, Vasquez HG, Guthrie PH, *et al.* Decreased long-chain fatty acid oxidation impairs postischemic recovery of the insulin-resistant rat heart. *FASEB J* 2013;**27**:3966–78. doi:10.1096/fj.13-234914
- 47 Harmancey R, Lam TN, Lubrano GM, *et al.* Insulin resistance improves metabolic and contractile efficiency in stressed rat heart. *FASEB J* 2012;**26**:3118–26. doi:10.1096/fj.12-208991
- 48 Zinman B, Inzucchi SE, Lachin JM, *et al.* Rationale, design, and baseline characteristics of a randomized, placebo-controlled cardiovascular outcome trial of empagliflozin (EMPA-REG OUTCOME™). *Cardiovasc Diabetol* 2014;**13**:102. doi:10.1186/1475-2840-13-102
- 49 Li N, Zhou H. SGLT2 Inhibitors: A Novel Player in the Treatment and Prevention of Diabetic Cardiomyopathy. *Drug Des Devel Ther* 2020;**Volume 14**:4775–88. doi:10.2147/DDDT.S269514
- 50 Ahtarovski K a, Iversen KK, Lønborg JT, *et al.* Left atrial and ventricular function during dobutamine and glycopyrrolate stress in healthy young and elderly as evaluated by cardiac magnetic resonance. *Am J Physiol Heart Circ Physiol* 2012;**303**:H1469-73. doi:10.1152/ajpheart.00365.2012
- 51 Flint a, Raben a, Blundell JE, *et al.* Reproducibility, power and validity of visual analogue scales in assessment of appetite sensations in single test meal studies. *Int J Obes Relat Metab Disord* 2000;**24**:38–48. <http://www.ncbi.nlm.nih.gov/pubmed/10702749>
- 52 Wolf P, Winhofer Y, Krssak M, *et al.* Suppression of plasma free fatty acids reduces myocardial lipid content and systolic function in type 2 diabetes. *Nutr Metab Cardiovasc Dis* 2016;**26**:387–92. doi:10.1016/j.numecd.2016.03.012
- 53 Grothues F, Smith GC, Moon JCC, *et al.* Comparison of interstudy reproducibility of cardiovascular magnetic resonance with two-dimensional echocardiography in normal subjects and in patients with heart failure or left ventricular hypertrophy. *Am J Cardiol* 2002;**90**:29–34. doi:10.1016/S0002-9149(02)02381-0
- 54 Morton G, Jogiya R, Plein S, *et al.* Quantitative cardiovascular magnetic resonance perfusion imaging: Inter-study reproducibility. *Eur Heart J Cardiovasc Imaging* 2012;**13**:954–60. doi:10.1093/ehjci/jes103

- 1  
2  
3  
4 55 Ahtarovski KA, Iversen KK, Lønborg JT, *et al.* Left atrial and ventricular function during  
5 dobutamine and glycopyrrolate stress in healthy young and elderly as evaluated by cardiac  
6 magnetic resonance. *Am J Physiol - Hear Circ Physiol* 2012;**303**:1469–73.  
7 doi:10.1152/ajpheart.00365.2012
- 8 56 Kumarathurai P, Anholm C, Larsen BS, *et al.* Effects of liraglutide on heart rate and heart  
9 rate variability: A randomized, double-blind, placebo-controlled crossover study. *Diabetes*  
10 *Care* 2017;**40**:117–24. doi:10.2337/dc16-1580
- 11 57 Ferrannini E, Mark M, Mayoux E. CV Protection in the EMPA-REG OUTCOME Trial: A  
12 &quot;Thrifty Substrate&quot; Hypothesis. *Diabetes Care* 2016;**39**:1108–14.  
13 doi:10.2337/dc16-0330
- 14 58 Jørgensen NB, Pedersen J, Vaag AA. EMPA-REG: Glucose excretion and lipid mobilization  
15 - not storage - saves lives. *J Diabetes Complications* 2016;**30**:753.  
16 doi:10.1016/j.jdiacomp.2016.02.015
- 17 59 The Lancet Diabetes Endocrinology. Getting to the heart of the matter in type 2 diabetes.  
18 *lancet Diabetes Endocrinol* 2015;**3**:827. doi:10.1016/S2213-8587(15)00384-8
- 19 60 DeFronzo RA. The EMPA-REG study: What has it told us? A diabetologist's perspective. *J*  
20 *Diabetes Complications* 2016;**30**:1–2. doi:10.1016/j.jdiacomp.2015.10.013
- 21 61 Nirengi S, Peres Valgas da Silva C, Stanford KI. Disruption of energy utilization in diabetic  
22 cardiomyopathy; a mini review. *Curr. Opin. Pharmacol.* 2020;**54**:82–90.  
23 doi:10.1016/j.coph.2020.08.015
- 24 62 DeFronzo RA. Banting Lecture. From the triumvirate to the ominous octet: a new paradigm  
25 for the treatment of type 2 diabetes mellitus. *Diabetes* 2009;**58**:773–95. doi:10.2337/db09-  
26 9028
- 27 63 Merovci A, Solis-Herrera C, Daniele G, *et al.* Dapagliflozin improves muscle insulin  
28 sensitivity but enhances endogenous glucose production. *J Clin Invest* 2014;**124**:509–14.  
29 doi:10.1172/JCI70704
- 30 64 Stanley WC, Lopaschuk GD, McCormack JG. Regulation of energy substrate metabolism in  
31 the diabetic heart. *Cardiovasc Res* 1997;**34**:25–  
32 33.<http://www.ncbi.nlm.nih.gov/pubmed/9217869> (accessed 3 Feb 2016).
- 33 65 Nolan CJ, Ruderman NB, Kahn SE, *et al.* Insulin resistance as a physiological defense  
34 against metabolic stress: implications for the management of subsets of type 2 diabetes.  
35 *Diabetes* 2015;**64**:673–86. doi:10.2337/db14-0694
- 36 66 Taegtmeier H, Beauloye C, Harmancey R, *et al.* Comment on Nolan et al. Insulin Resistance  
37 as a Physiological Defense Against Metabolic Stress: Implications for the Management of  
38 Subsets of Type 2 Diabetes. *Diabetes* 2015;**64**:673–686. *Diabetes* 2015;**64**:e37.  
39 doi:10.2337/db15-0655
- 40 67 Taegtmeier H, Beauloye C, Harmancey R, *et al.* Insulin resistance protects the heart from  
41 fuel overload in dysregulated metabolic states. *Am J Physiol Heart Circ Physiol*  
42 2013;**305**:H1693-7. doi:10.1152/ajpheart.00854.2012
- 43 68 Rau M, Thiele K, Hartmann NUK, *et al.* Empagliflozin does not change cardiac index nor  
44 systemic vascular resistance but rapidly improves left ventricular filling pressure in patients  
45 with type 2 diabetes: a randomized controlled study. *Cardiovasc Diabetol* 2021;**20**.  
46 doi:10.1186/s12933-020-01175-5
- 47 69 Lauritsen KM, Nielsen BRR, Tolbod LP, *et al.* SGLT2 Inhibition Does Not Affect  
48 Myocardial Fatty Acid Oxidation or Uptake, But Reduces Myocardial Glucose Uptake and  
49 Blood Flow in Individuals With Type 2 Diabetes– a Randomized Double-Blind, Placebo-  
50 Controlled Crossover Trial. *Diabetes* 2020;**70**:db200921. doi:10.2337/db20-0921
- 51 70 Oldgren J, Laurila S, Åkerblom A, *et al.* Effects of 6 weeks treatment with dapagliflozin, a  
52 sodium-glucose co-transporter 2 inhibitor, on myocardial function and metabolism in patients  
53 with type 2 diabetes: a randomized placebo-controlled exploratory study. *Diabetes, Obes*  
54 *Metab* 2021;:dom.14363. doi:10.1111/dom.14363
- 55 71 Hiruma S, Shigiyama F, Hisatake S, *et al.* A prospective randomized study comparing effects  
56 of empagliflozin to sitagliptin on cardiac fat accumulation, cardiac function, and cardiac  
57 metabolism in patients with early-stage type 2 diabetes: the ASSET study. *Cardiovasc*  
58 *Diabetol* 2021;**20**. doi:10.1186/s12933-021-01228-3
- 59  
60

- 1  
2  
3  
4 72 Deacon CF. A review of dipeptidyl peptidase-4 inhibitors. Hot topics from randomized  
5 controlled trials. *Diabetes, Obes. Metab.* 2018;**20**:34–46. doi:10.1111/dom.13135  
6 73 Nordsborg N, Timmerman M. *Testmanual - patientinterview og konditionstest. 2.0.*  
7 København: : Sundhedsstyrelsen 2006.  
8  
9  
10  
11  
12  
13  
14  
15  
16  
17  
18  
19  
20  
21  
22  
23  
24  
25  
26  
27  
28  
29  
30  
31  
32  
33  
34  
35  
36  
37  
38  
39  
40  
41  
42  
43  
44  
45  
46  
47  
48  
49  
50  
51  
52  
53  
54  
55  
56  
57  
58  
59  
60

For peer review only

Study outline

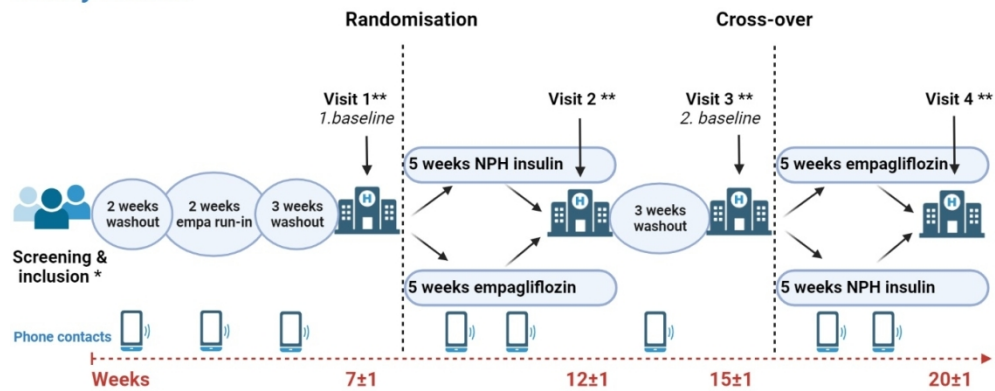

\* See text box 3 for screening procedure

\*\* See text box 4 & 5 for visit overview

Figure 1. Study outline. Included patients undergo a 7-week program of washout of pre-existing antiglycemic treatment (except metformin) and run-in of empagliflozin. Hereafter they are randomised to treatment for 5±1 weeks, followed by 3±1 weeks wash-out and cross-over to 5±1 weeks treatment with the remaining study drug. Tests performed at each visit are summarised in Box 4 and 5.

369x187mm (96 x 96 DPI)

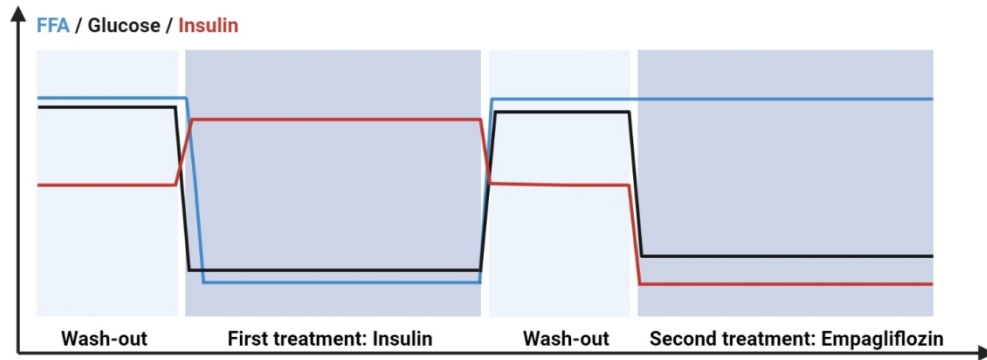

Figure 2. Metabolic profile of the two study drugs. Schematic representation of the metabolic changes expected with the two study drug treatments in a patient randomized to insulin first. Insulin treatment is characterized by low glucose, low FFAs and high insulin concentrations; empagliflozin treatment by low glucose, high FFAs and low insulin.

396x151mm (96 x 96 DPI)



NB: THIS CONSENT FORM IS TRANSLATED FROM THE ORIGINAL DANISH FORM

1  
2  
3  
4  
5  
6  
7  
8  
9  
10  
11  
12  
13  
14  
15  
16  
17  
18  
19  
20  
21  
22  
23  
24  
25  
26  
27  
28  
29  
30  
31  
32  
33  
34  
35  
36  
37  
38  
39  
40  
41  
42  
43  
44  
45  
46  
47  
48  
49  
50  
51  
52  
53  
54  
55  
56  
57  
58  
59  
60

(S4)

**Informed consent to participate in a health science research study.**

Title of the research project: "The role of hyperglycemia, hyperinsulinemia and elevated free fatty acids for cardiac function in patients with type 2 diabetes – the HyperCarD2 study".

**Declaration from the patient:**

I have received written and oral information and I know enough about the purpose, method, benefits and disadvantages of saying yes to participating.

I know that participating is voluntary and that I can always withdraw my consent without losing my current or future rights to treatment.

I give my consent to participate in the research study and to have my biological material collected and stored in a research biobank. I have received a copy of this consent form as well as a copy of the written information about the study for my own use.

Name of the patient: \_\_\_\_\_

Date: \_\_\_\_\_ Signature: \_\_\_\_\_

If new essential health information about you appears in the research study, you will be informed. If you would like to **decline** receiving any new information about your health that appears in the research project, please mark here: \_\_\_\_\_ (insert an x)

Do you want to be informed about the result of the research study and any possible consequences for you?

Yes \_\_\_\_\_ (insert an x)      No \_\_\_\_\_ (insert an x)

**Declaration from the person providing the information:**

I declare that the patient has received oral and written information about the research study.

In my opinion, sufficient information has been provided to enable a decision to be taken on participation in the study.

The name of the person who provided the information: Roopameera Thirumathyam

Date: \_\_\_\_\_ Signature: \_\_\_\_\_

Study identification: (E.g comiteé ID, EudraCT no., version no./date or similar.)

EudraCT 2017-002101-35
