# Supplementary material for: Investigating the roles of hyperglycaemia, hyperinsulinaemia and elevated free fatty acids in cardiac function in patients with type 2 diabetes via treatment with insulin compared with empagliflozin: protocol for the HyperCarD2 randomised, crossover trial
Source: PubMed Central journal article supplement — BMJ Open. 2022 Aug 11;12(8):e054100. doi: 10.1136/bmjopen-2021-054100 (PMC9379482; doi:10.1136/bmjopen-2021-054100), 2022-08-11
Supplement: bmjopen-2021-054100supp001.pdf [file bmjopen-2021-054100supp001.pdf]

NB: THIS CONSENT FORM IS TRANSLATED FROM THE ORIGINAL DANISH FORM

**(S4)**

**Informed consent to participate in a health science research study.**

Title of the research project: "The role of hyperglycemia, hyperinsulinemia and elevated free fatty acids for cardiac function in patients with type 2 diabetes – the HyperCarD2 study".

**Declaration from the patient:**

I have received written and oral information and I know enough about the purpose, method, benefits and disadvantages of saying yes to participating.

I know that participating is voluntary and that I can always withdraw my consent without losing my current or future rights to treatment.

I give my consent to participate in the research study and to have my biological material collected and stored in a research biobank. I have received a copy of this consent form as well as a copy of the written information about the study for my own use.

Name of the patient: \_\_\_\_\_

Date: \_\_\_\_\_ Signature: \_\_\_\_\_

If new essential health information about you appears in the research study, you will be informed. If you would like to **decline** receiving any new information about your health that appears in the research project, please mark here: \_\_\_\_\_ (insert an x)

Do you want to be informed about the result of the research study and any possible consequences for you?

Yes \_\_\_\_\_ (insert an x)      No \_\_\_\_\_ (insert an x)

**Declaration from the person providing the information:**

I declare that the patient has received oral and written information about the research study.

In my opinion, sufficient information has been provided to enable a decision to be taken on participation in the study.

The name of the person who provided the information: Roopameera Thirumathyam

Date: \_\_\_\_\_ Signature: \_\_\_\_\_

Study identification: (E.g comité ID, EudraCT no., version no./date or similar.)

EudraCT 2017-002101-35
